# Supplementary material for: Canonical and Interior Circular RNAs Function as Competing Endogenous RNAs in Psoriatic Skin
Source: MDPI journal article supplement (doi:10.3390/ijms22105182), 2021-05-13
Supplement: s1 [file s1]

### Supplementary Online Content

**Figure S1.** Dataset and distribution of circRNAs.

**Figure S2.** Experimental validation of three identified circRNAs, *CDR1as*, *hsa\_skin\_088763* and *hsa\_skin\_052271* in psoriatic skin and HaCaT keratinocyte cells.

**Figure S3.** Pathways enriched by circRNA-associated genes between PP and NN.

**Figure S4.** Pathways enriched by circRNA-associated genes between PP and PN.

**Figure S5.** Pathways enriched by circRNA-associated genes between PN and NN.

**Figure S6.** Pathways enriched by differentially expressed genes between PP and NN.

**Table S1.** RNA-seq datasets

**Table S2.** 179 abundant circRNAs (expressed in at least 10 samples and supported by at least 5 reads in at least one sample, GRCh38)

**Table S3.** Genes significantly differentially expressed between PP and NN

**Table S4.** Divergent and convergent primers for the validation experiments

**Table S5.** Associated genes of three validated circRNAs, *CDR1as*, *hsa\_skin\_088763* and *hsa\_skin\_052271*

**Table S6.** CircRNAs significantly differentially expressed between PP and NN (p-value < 0.01)

## figures

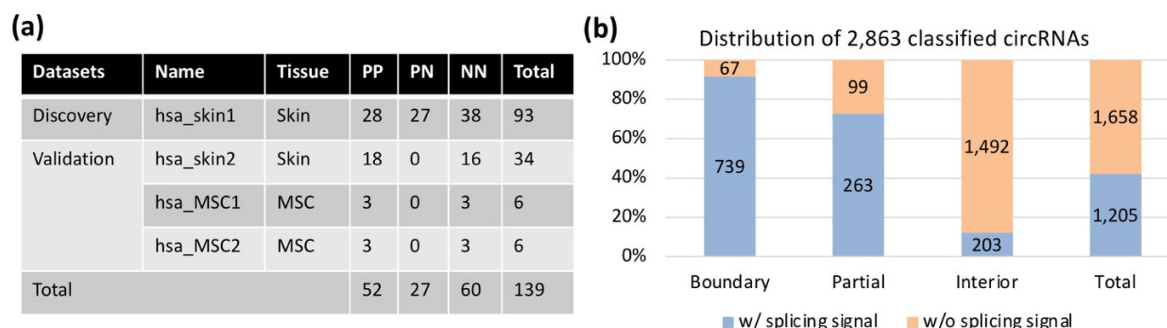

**Figure S1.** Dataset and distribution of circRNAs. **(a)** Distribution among psoriatic-involved (PP), psoriatic-uninvolved (PN) and normal (NN) skin of the 139 samples from four datasets: *hsa\_MSC1*, *hsa\_MSC2*, *hsa\_skin1* and *hsa\_skin2*. **(b)** Distribution of 2,863 annotated circRNAs and i-circRNAs in four datasets that are supported by at least 2 reads. Boundary circRNAs are canonical circRNAs, and i-circRNAs are further classified into *partial* and *complete i-circRNAs*. All circRNAs are further annotated as whether being adjacent to splicing signals or not.

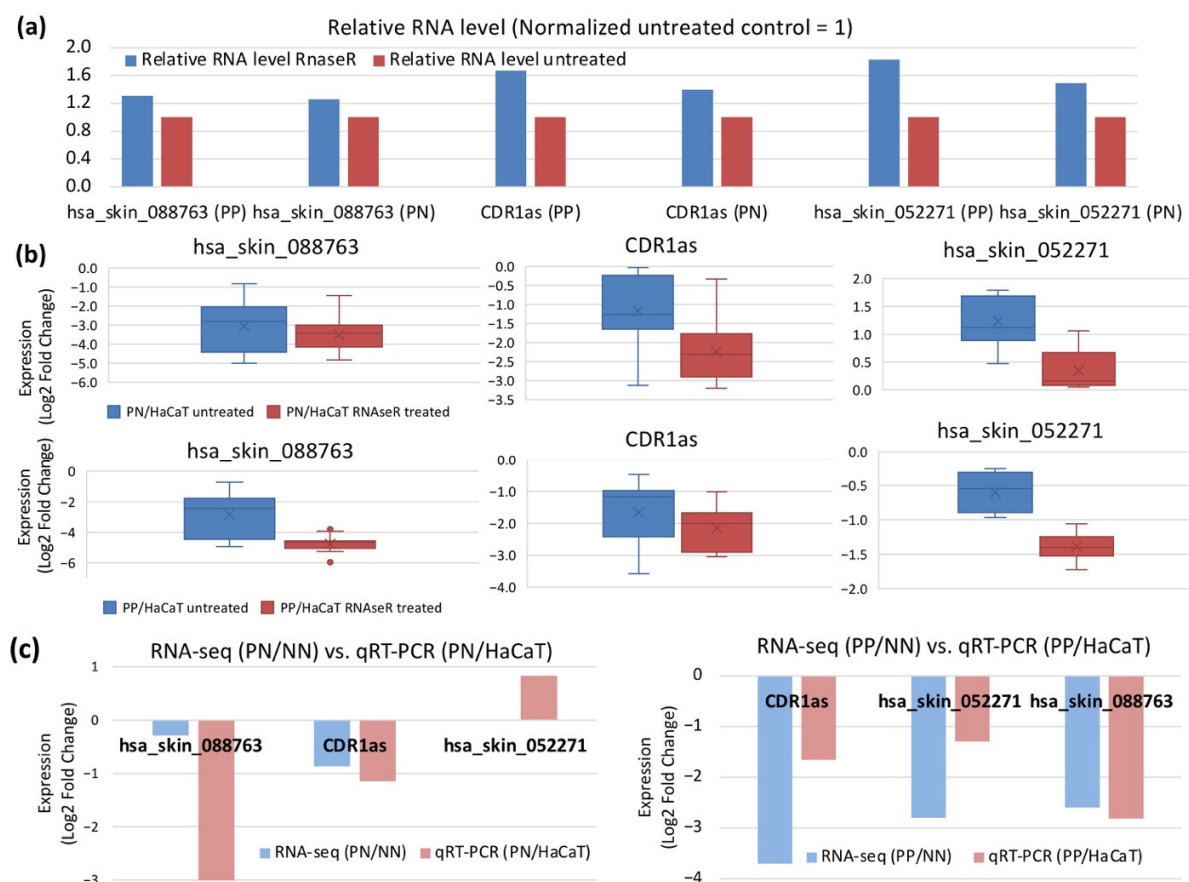

**Figure S2.** Experimental validation of three identified circRNAs, *CDR1as*, *hsa\_skin\_088763* and *hsa\_skin\_052271* in psoriatic skin and HaCaT keratinocyte cells. **(a)** Validation of existence of circRNAs in PP and PN skin by RNase R treatment. **(b)** Box and whisker plot for RNaseR and **(c)** Quantitative real-time (qRT-PCR) validation of differentially expressed circRNAs *hsa\_skin\_088763*, *CDR1as*, and *hsa\_skin\_052271* between PN vs. HaCaT and PP vs. HaCaT.

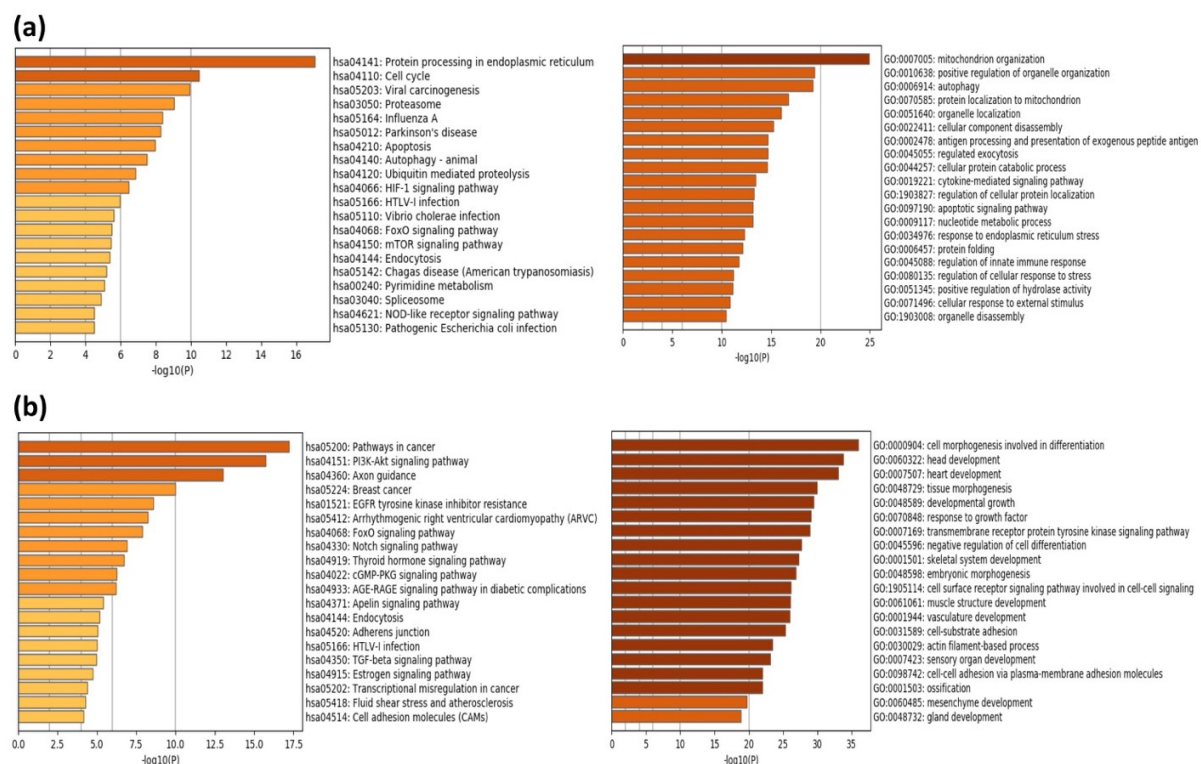

**Figure S3.** Pathways enriched by circRNA-associated genes between PP and NN. Enriched KEGG pathways (left) and GO pathways (right) by **(a)** up-regulated and **(b)** down-regulated circRNA-associated genes in PP vs. NN.

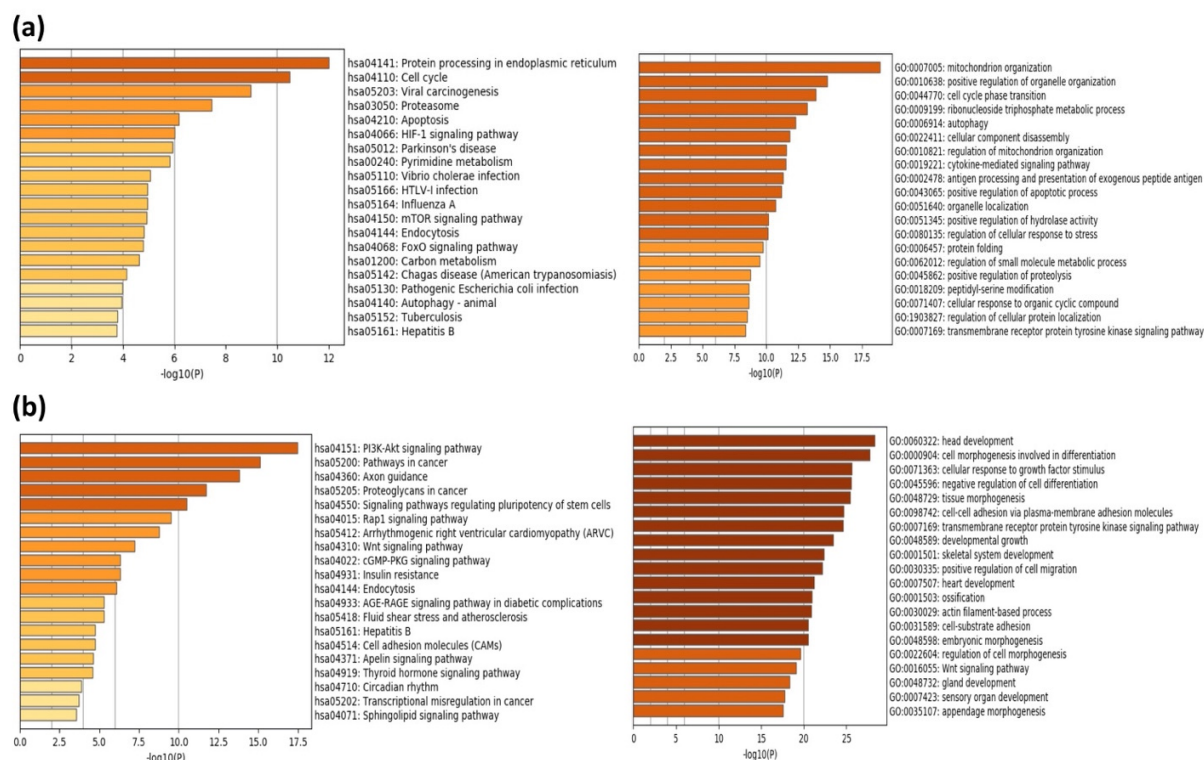

**Figure S4.** Pathways enriched by circRNA-associated genes between PP and PN. Enriched KEGG pathways (left) and GO pathways (right) by **(a)** up-regulated and **(b)** down-regulated circRNA-associated genes in PP vs. PN.

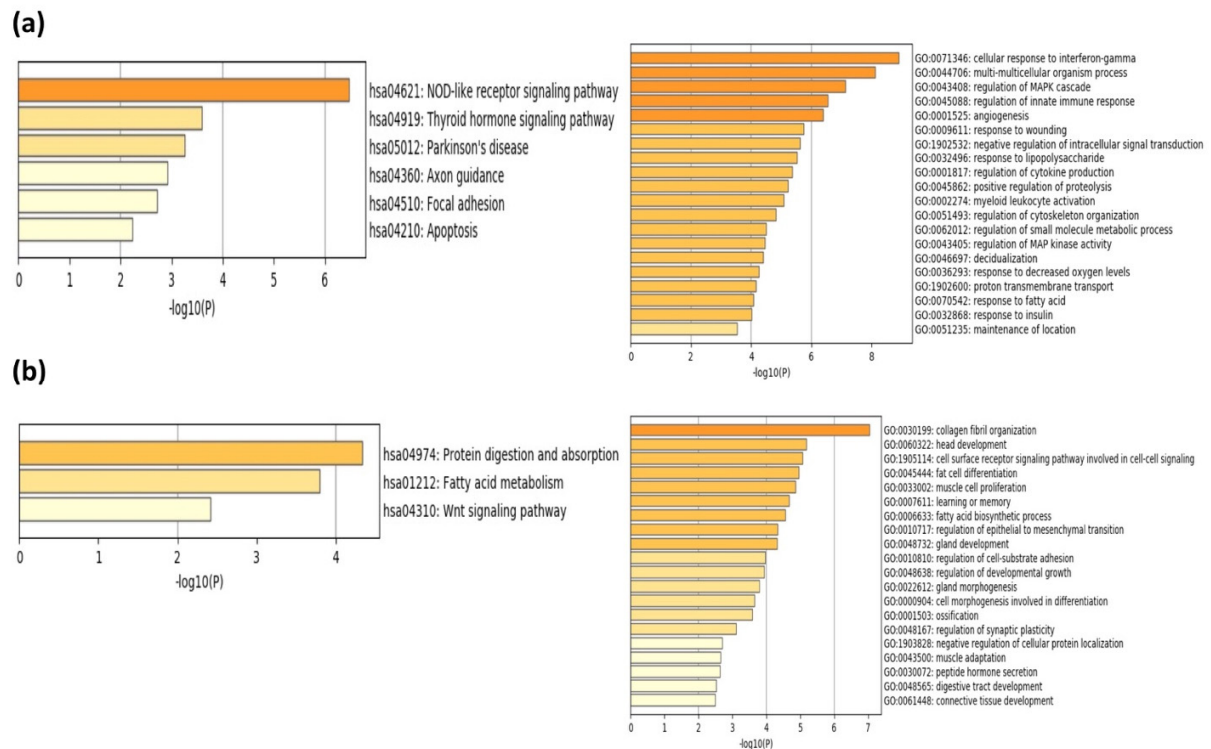

**Figure S5.** Pathways enriched by circRNA-associated genes between PN and NN. Enriched KEGG pathways (left) and GO pathways (right) by **(a)** up-regulated and **(b)** down-regulated circRNA-associated genes in PN vs. NN.

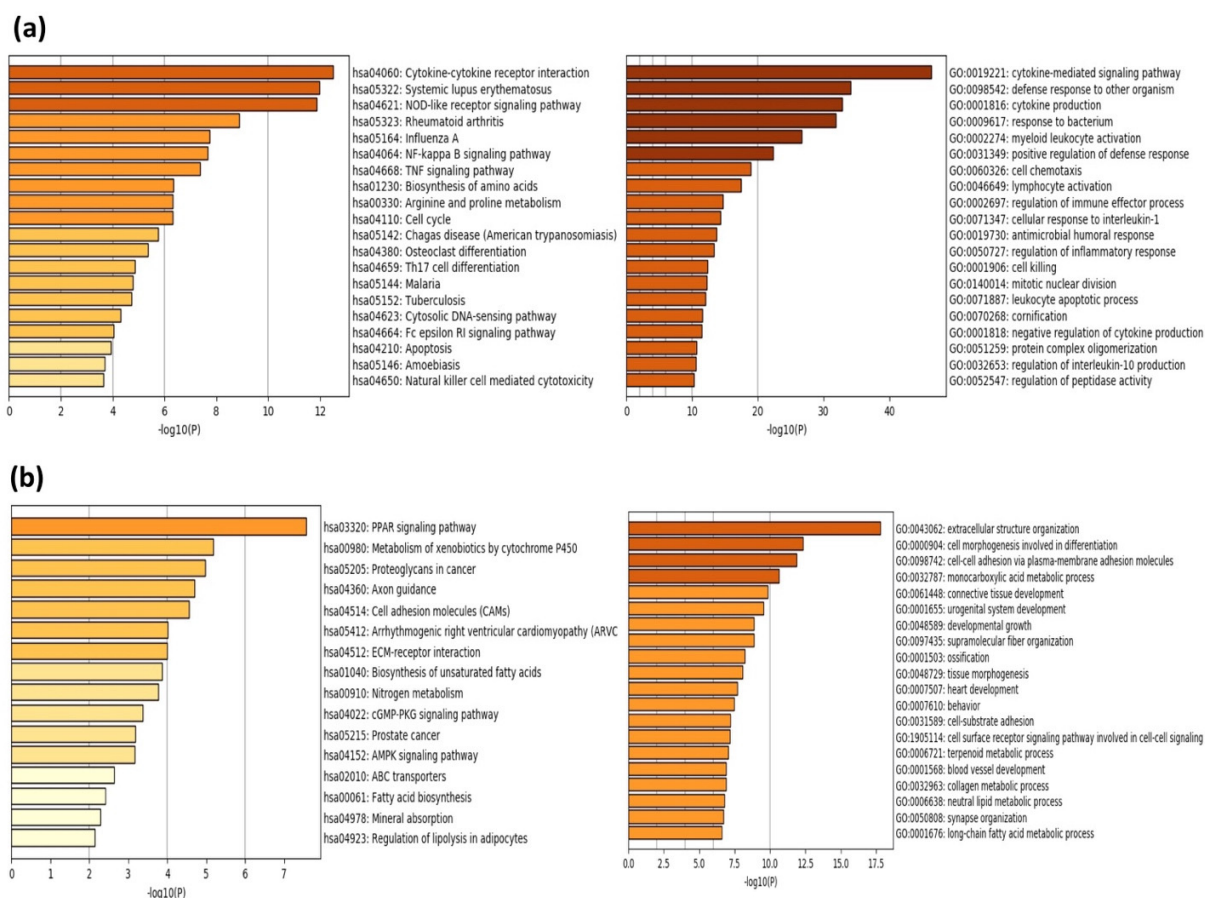

**Figure S6.** Pathways enriched by differentially expressed genes between PP and NN. Enriched KEGG pathways (left) and GO pathways (right) by **(a)** up-regulated and **(b)** down-regulated genes.

**Table S1. RNA-seq datasets**

| Name      | Organism     | Tissue                              | RNA library preparation                           | # samples | Accession |
|-----------|--------------|-------------------------------------|---------------------------------------------------|-----------|-----------|
| hsa_MSC1  | homo sapiens | Skin-derived Mesenchymal stem cells | circRNA enriched, stranded total RNA, paired-end  | 6         | GSE81106  |
| hsa_MSC2  | homo sapiens | Skin-derived Mesenchymal stem cells | ribo-zero, stranded total RNA, paired-end         | 6         | GSE89725  |
| hsa_skin1 | homo sapiens | skin                                | ribo-zero, stranded total RNA, paired-end         | 93        | GSE121212 |
| hsa_skin2 | homo sapiens | skin                                | ribosome-depleted, stranded total RNA, paired-end | 34        | GSE74697  |



**Table S2. 179 Abundant circRNAs (expressed in at least 10 samples && supported by at least 5 reads in at least one sample, GRCh38)**

chrom: chromosome of circRNA

start: start position or possible region (zero based) of circRNA

end: end position or possible region (exclusive) of circRNA

s: strand orientation

name: circRNA identifier

reads: number of supporting reads

uniq: number of unique supporting reads

ss: splicing signal, 2 = major signal AG/GT, 1 = minor signal AC/AT, 0 = no signal

len: distance between start and end position

SHS: short homologous sequence

host\_gene: genes overlapping with circRNAs

anno: type of annotations (exon/intron) overlap with circRNA

type: Whether the candidate originated from annotation boundary. B:boundary, I: Interior, 5': 5' boundary, 3': 3' boundary.

cs: Complementary sequences: Whether the 100-bp sequence outside of circRNA is complementary or not

| chrom | start               | end                 | s | name                     | reads | uniq | ss | len  | SHS                                                                              | host_gene                                               | anno            | type | cs   |
|-------|---------------------|---------------------|---|--------------------------|-------|------|----|------|----------------------------------------------------------------------------------|---------------------------------------------------------|-----------------|------|------|
| chrX  | 140783169-140783175 | 140784654-140784660 | + | hsa_skin_194345 (CDR1as) | 1440  | 262  | 2  | 1485 | TCCAGG                                                                           | CDR1-AS                                                 | intergenic      | I    | no   |
| chr1  | 152352401-152352423 | 152352626-152352648 | - | hsa_skin_052271          | 22    | 12   | 0  | 225  | CCACACAG<br>ACAGGGTC<br>CAGGAC                                                   | FLG2                                                    | exon            | I    | no   |
| chr19 | 23831593-23831599   | 23833518-23833524   | + | hsa_skin_088763          | 405   | 108  | 2  | 1925 | TAGGTA                                                                           | RP11-255H23.2                                           | exon            | B    | no   |
| chr3  | 37325180-37325187   | 37325378-37325385   | + | hsa_skin_124531          | 18    | 8    | 0  | 198  | GAAGAAG                                                                          | GOLGA4                                                  | intron;<br>exon | I    | no   |
| chr11 | 65499641-65499650   | 65499860-65499869   | + | hsa_skin_006690          | 48    | 31   | 0  | 219  | AAGATAGAA                                                                        | MALAT1                                                  | intron;<br>exon | I    | no   |
| chr1  | 62161623-62161626   | 62162662-62162665   | + | hsa_skin_212178          | 74    | 27   | 0  | 1039 | CCA                                                                              | INADL                                                   | intron;<br>exon | I    | fold |
| chr11 | 65504856-65504859   | 65505049-65505052   | + | hsa_skin_228518          | 50    | 25   | 0  | 193  | AAG                                                                              | MALAT1                                                  | exon            | I    | no   |
| chr17 | 7576810-7576812     | 7576950-7576952     | + | hsa_skin_169953          | 99    | 18   | 0  | 140  | GC                                                                               | EIF4A1;<br>RP11-186B7.4;<br>SEN3-<br>EIF4A1;<br>SNORD10 | exon            | 3' B | no   |
| chr19 | 35497284-35497288   | 35497481-35497485   | - | hsa_skin_017574          | 318   | 103  | 0  | 197  | CTCC                                                                             | DMKN                                                    | exon            | 3' B | no   |
| chr10 | 124942455-124942456 | 124943306-124943307 | + | hsa_skin_142248          | 529   | 144  | 2  | 851  | G                                                                                | RP11-298J20.4;<br>ZNRAN1                                | exon            | 3' B | no   |
| chr1  | 152354735-152354791 | 152354966-152355022 | - | hsa_skin_194228          | 65    | 24   | 1  | 231  | TATGGCCA<br>ACATGGTT<br>CTGGCTCA<br>AGTCAGTC<br>ATCTGGCT<br>ATGGTCAA<br>CATGGGTC | FLG2                                                    | exon            | I    | fold |
| chr12 | 52645094-52645118   | 52645241-52645265   | - | hsa_skin_151142          | 77    | 36   | 0  | 147  | CTCTGGAG<br>GAGGATAT<br>GGCTCTGG                                                 | KRT2                                                    | exon            | I    | no   |
| chr17 | 39254341-39254346   | 39255167-39255172   | - | hsa_skin_017093          | 25    | 21   | 0  | 826  | AGCCA                                                                            | FBXL20                                                  | exon            | I    | fold |
| chr1  | 152314125-152314130 | 152314264-152314269 | - | hsa_skin_226345          | 19    | 10   | 0  | 139  | AGAAA                                                                            | FLG                                                     | exon            | I    | no   |
| chr20 | 25297074-25297079   | 25297389-25297394   | + | hsa_skin_023969          | 26    | 15   | 0  | 315  | CTGCC                                                                            | PYGB                                                    | exon            | I    | no   |
| chr12 | 52645124-52645131   | 52645271-52645278   | - | hsa_skin_060631          | 51    | 30   | 0  | 147  | GAGGAGG                                                                          | KRT2                                                    | exon            | I    | no   |

Circular RNAs and interior circular RNAs under psoriatic skin, X. Liu *et al.*

| chrom | start               | end                 | s | name            | reads | uniq | ss | len  | SHS     | host_gene          | anno | type | cs   |
|-------|---------------------|---------------------|---|-----------------|-------|------|----|------|---------|--------------------|------|------|------|
| chr19 | 35497289-35497290   | 35497483-35497484   | - | hsa_skin_070366 | 308   | 98   | 0  | 194  | T       | DMKN               | exon | I    | no   |
| chr1  | 152314108-152314115 | 152314276-152314283 | - | hsa_skin_175896 | 70    | 33   | 0  | 168  | TGAAAGA | FLG                | exon | I    | no   |
| chr3  | 188882983-188882986 | 188883478-188883481 | + | hsa_skin_126952 | 143   | 38   | 0  | 495  | TCC     | LPP                | exon | I    | fold |
| chr10 | 86925982-86925988   | 86926267-86926273   | + | hsa_skin_020081 | 45    | 20   | 0  | 285  | TCCCAA  | BMP1A              | exon | I    | fold |
| chr1  | 152356347-152356353 | 152356497-152356503 | - | hsa_skin_093700 | 34    | 14   | 0  | 150  | GCTTTG  | FLG2               | exon | I    | no   |
| chr12 | 52644846-52644852   | 52644989-52644995   | - | hsa_skin_057157 | 70    | 19   | 0  | 143  | CTCTCC  | KRT2               | exon | I    | no   |
| chr2  | 54972968-54972975   | 54973124-54973131   | - | hsa_skin_055859 | 31    | 14   | 0  | 156  | GTTCATC | RTN4               | exon | I    | no   |
| chr3  | 188880286-188880293 | 188880862-188880869 | + | hsa_skin_038904 | 63    | 28   | 0  | 576  | TCCCAA  | LPP                | exon | I    | fold |
| chr3  | 179398017-179398019 | 179398266-179398268 | - | hsa_skin_084435 | 67    | 30   | 0  | 249  | TG      | GNB4               | exon | I    | fold |
| chr2  | 173954872-173954875 | 173956232-173956235 | - | hsa_skin_009497 | 366   | 124  | 2  | 1360 | CAG     | SP3                | exon | B    | no   |
| chr11 | 12764177-12764180   | 12764433-12764436   | + | hsa_skin_186524 | 65    | 32   | 2  | 256  | GGT     | TEAD1              | exon | B    | no   |
| chr8  | 38819521            | 38820635            | + | hsa_skin_044843 | 23    | 14   | 2  | 1114 | -       | TACC1              | exon | B    | no   |
| chr10 | 68644696-68644698   | 68647004-68647006   | + | hsa_skin_006010 | 231   | 65   | 2  | 2308 | GG      | TET1               | exon | B    | no   |
| chr17 | 40495986-40495987   | 40496520-40496521   | - | hsa_skin_141959 | 90    | 46   | 2  | 534  | G       | TNS4               | exon | B    | no   |
| chr2  | 23823256-23823259   | 23823568-23823571   | - | hsa_skin_223319 | 60    | 35   | 2  | 312  | AGG     | ATAD2B             | exon | B    | no   |
| chr2  | 40428470-40428472   | 40430299-40430301   | - | hsa_skin_130041 | 134   | 60   | 2  | 1829 | GT      | SLC8A1             | exon | B    | no   |
| chr17 | 83084936-83084937   | 83085322-83085323   | + | hsa_skin_203265 | 203   | 79   | 2  | 386  | G       | METRNL             | exon | B    | no   |
| chr17 | 73235473-73235476   | 73236993-73236996   | + | hsa_skin_189139 | 66    | 40   | 2  | 1520 | AGG     | C17orf80           | exon | B    | no   |
| chr5  | 73840477-73840481   | 73840758-73840762   | + | hsa_skin_013327 | 125   | 47   | 2  | 281  | AGGT    | ARHGEF28           | exon | B    | no   |
| chr10 | 68959803-68959805   | 68960247-68960249   | + | hsa_skin_153897 | 243   | 86   | 2  | 444  | AG      | DDX21              | exon | B    | no   |
| chr18 | 2890560             | 2892486             | + | hsa_skin_172138 | 138   | 68   | 2  | 1926 | -       | EMILIN2            | exon | B    | no   |
| chr14 | 99257470-99257473   | 99257839-99257842   | - | hsa_skin_065509 | 326   | 124  | 2  | 369  | CAG     | BCL11B             | exon | B    | no   |
| chr17 | 46170854            | 46172232            | - | hsa_skin_039501 | 80    | 51   | 2  | 1378 | -       | AC217773.1; KANSL1 | exon | B    | no   |
| chr5  | 66053403-66053406   | 66054949-66054952   | + | hsa_skin_130930 | 737   | 154  | 2  | 1546 | AGG     | ERBB2IP            | exon | B    | no   |
| chr5  | 177209633-177209637 | 177212193-177212197 | + | hsa_skin_187603 | 86    | 46   | 2  | 2560 | AGGT    | NSD1               | exon | B    | no   |
| chr1  | 28987428-28987430   | 28987903-28987905   | + | hsa_skin_228015 | 53    | 34   | 2  | 475  | AG      | EPB41              | exon | B    | no   |
| chr1  | 224189575-224189576 | 224190318-224190319 | + | hsa_skin_039030 | 197   | 52   | 2  | 743  | G       | DEGS1              | exon | B    | no   |
| chr1  | 151315572-151315574 | 151316509-151316511 | - | hsa_skin_026246 | 120   | 51   | 2  | 937  | AG      | PI4KB              | exon | B    | no   |
| chr4  | 186706562-186706565 | 186709845-186709848 | - | hsa_skin_186947 | 251   | 114  | 2  | 3283 | CAG     | FAT1               | exon | B    | no   |
| chr11 | 92352094-92352096   | 92355403-92355405   | + | hsa_skin_112375 | 139   | 58   | 2  | 3309 | GG      | FAT3               | exon | B    | no   |
| chr12 | 45926138-45926142   | 45928856-45928860   | - | hsa_skin_069048 | 199   | 87   | 2  | 2718 | GGTA    | SCAF11             | exon | B    | no   |
| chr8  | 127890586-127890589 | 127890996-127890999 | + | hsa_skin_171562 | 123   | 54   | 2  | 410  | AGG     | PVT1; PVT1_3       | exon | B    | no   |
| chr6  | 111177210-111177211 | 111177664-111177665 | + | hsa_skin_019506 | 26    | 13   | 2  | 454  | G       | SLC16A10           | exon | B    | no   |
| chr16 | 346146-346150       | 347105-347109       | - | hsa_skin_213436 | 68    | 43   | 2  | 959  | CAGG    | AXIN1              | exon | B    | fold |
| chr4  | 177353304-177353307 | 177353725-177353728 | + | hsa_skin_031743 | 70    | 38   | 2  | 421  | CAG     | NEIL3              | exon | B    | no   |

Circular RNAs and interior circular RNAs under psoriatic skin, X. Liu *et al.*

| chrom | start               | end                 | s | name            | reads | uniq | ss | len  | SHS     | host_gene               | anno | type | cs   |
|-------|---------------------|---------------------|---|-----------------|-------|------|----|------|---------|-------------------------|------|------|------|
| chr12 | 14423906-14423908   | 14425471-14425473   | + | hsa_skin_001100 | 142   | 63   | 2  | 1565 | AG      | ATF7IP                  | exon | B    | no   |
| chr4  | 36228580-36228583   | 36229644-36229647   | - | hsa_skin_083065 | 2572  | 324  | 2  | 1064 | AGG     | ARAP2                   | exon | B    | no   |
| chr12 | 95208842-95208844   | 95211267-95211269   | - | hsa_skin_192569 | 396   | 148  | 2  | 2425 | AG      | FGD6                    | exon | B    | no   |
| chr8  | 38429681-38429684   | 38429948-38429951   | - | hsa_skin_194732 | 38    | 24   | 2  | 267  | CAG     | FGFR1                   | exon | B    | no   |
| chr22 | 32478979-32478980   | 32479274-32479275   | + | hsa_skin_223866 | 98    | 49   | 2  | 295  | G       | FBXO7                   | exon | B    | no   |
| chr8  | 60741255-60741259   | 60743094-60743098   | + | hsa_skin_218487 | 146   | 61   | 2  | 1839 | CAGG    | CHD7                    | exon | B    | no   |
| chr3  | 136001056-136001060 | 136003491-136003495 | + | hsa_skin_174542 | 72    | 28   | 2  | 2435 | AGGT    | PPP2R3A                 | exon | B    | no   |
| chr17 | 20204329-20204333   | 20205909-20205913   | + | hsa_skin_192421 | 398   | 120  | 2  | 1580 | AAGG    | AC004702.2;<br>SPECC1   | exon | B    | fold |
| chr6  | 161048613-161048615 | 161049977-161049979 | + | hsa_skin_198152 | 79    | 31   | 2  | 1364 | AG      | MAP3K4                  | exon | B    | no   |
| chr18 | 46890579-46890584   | 46891054-46891059   | - | hsa_skin_121259 | 29    | 17   | 2  | 475  | TTTAG   | PIAS2                   | exon | B    | no   |
| chr6  | 134028379-134028380 | 134029720-134029721 | - | hsa_skin_189369 | 51    | 26   | 2  | 1341 | G       | SLC2A12                 | exon | B    | no   |
| chr8  | 100287500-100287501 | 100288267-100288268 | - | hsa_skin_102735 | 149   | 62   | 2  | 767  | G       | RNF19A                  | exon | B    | no   |
| chr4  | 109462899-109462902 | 109463643-109463646 | + | hsa_skin_059513 | 51    | 26   | 2  | 744  | GGT     | SEC24B                  | exon | B    | no   |
| chr2  | 40428472            | 40430304            | - | hsa_skin_192510 | 884   | 194  | 2  | 1832 | -       | SLC8A1                  | exon | B    | no   |
| chr2  | 207976650-207976652 | 207977586-207977588 | - | hsa_skin_072281 | 410   | 112  | 2  | 936  | AG      | PLEKHM3                 | exon | B    | no   |
| chr18 | 44701172-44701174   | 44701830-44701832   | + | hsa_skin_043278 | 150   | 62   | 2  | 658  | AG      | SETBP1                  | exon | B    | no   |
| chr6  | 75702639-75702644   | 75703067-75703072   | + | hsa_skin_169713 | 160   | 56   | 2  | 428  | TACAG   | SENP6                   | exon | B    | no   |
| chr1  | 12275822-12275824   | 12278036-12278038   | + | hsa_skin_184098 | 211   | 76   | 2  | 2214 | AG      | VPS13D                  | exon | B    | no   |
| chr10 | 45625950-45625951   | 45627105-45627106   | - | hsa_skin_032293 | 29    | 16   | 2  | 1155 | G       | ZFAND4                  | exon | B    | no   |
| chr7  | 98191610-98191617   | 98194569-98194576   | + | hsa_skin_175784 | 134   | 53   | 2  | 2959 | CAGGTAT | LMTK2                   | exon | B    | no   |
| chr19 | 13025019-13025021   | 13025551-13025553   | + | hsa_skin_231328 | 139   | 56   | 2  | 532  | GG      | NFIX                    | exon | B    | no   |
| chr12 | 82857009            | 82857580            | + | hsa_skin_144913 | 212   | 85   | 2  | 571  | -       | TMTC2                   | exon | B    | no   |
| chr5  | 83537003-83537008   | 83542265-83542270   | + | hsa_skin_130995 | 175   | 59   | 2  | 5262 | CAGGT   | VCAN                    | exon | B    | no   |
| chr13 | 52397231-52397234   | 52398194-52398197   | - | hsa_skin_216799 | 79    | 38   | 2  | 963  | CAG     | THSD1                   | exon | B    | no   |
| chr10 | 124681606-124681609 | 124682379-124682382 | - | hsa_skin_148616 | 320   | 114  | 2  | 773  | CAG     | FAM53B;<br>RP11-12J10.3 | exon | B    | no   |
| chr1  | 155853275-155853277 | 155853806-155853808 | - | hsa_skin_206471 | 411   | 142  | 2  | 531  | AG      | GON4L                   | exon | B    | no   |
| chr6  | 48917110-48917114   | 4892377-4892381     | + | hsa_skin_001947 | 1422  | 345  | 2  | 667  | AGGT    | CDYL                    | exon | B    | no   |
| chr12 | 128814772-128814775 | 128815068-128815071 | - | hsa_skin_213580 | 92    | 46   | 2  | 296  | GGT     | SLC15A4                 | exon | B    | no   |
| chr17 | 77402057-77402058   | 77402702-77402703   | + | hsa_skin_084383 | 173   | 73   | 2  | 645  | G       | 9-Sep                   | exon | B    | fold |
| chr13 | 30630832-30630834   | 30631472-30631474   | + | hsa_skin_150608 | 41    | 31   | 2  | 640  | AG      | USPL1                   | exon | B    | no   |
| chr7  | 66240324            | 66241270            | + | hsa_skin_203402 | 92    | 44   | 2  | 946  | -       | TPST1                   | exon | B    | no   |
| chr8  | 51860843-51860846   | 51861245-51861248   | - | hsa_skin_034968 | 3525  | 381  | 2  | 402  | AGG     | PCMTD1                  | exon | B    | no   |
| chr5  | 61472679-61472682   | 61473036-61473039   | + | hsa_skin_104582 | 144   | 64   | 2  | 357  | GGT     | ZSWIM6                  | exon | B    | no   |
| chr4  | 73090665-73090668   | 73092299-73092302   | - | hsa_skin_189986 | 490   | 120  | 2  | 1634 | AGG     | ANKRD17                 | exon | B    | no   |
| chr17 | 37553113-37553117   | 37554058-37554062   | - | hsa_skin_017912 | 52    | 26   | 2  | 945  | CAGG    | SYNRG                   | exon | B    | fold |

Circular RNAs and interior circular RNAs under psoriatic skin, X. Liu *et al.*

| chrom | start               | end                 | s | name            | reads | uniq | ss | len  | SHS     | host_gene           | anno | type | cs   |
|-------|---------------------|---------------------|---|-----------------|-------|------|----|------|---------|---------------------|------|------|------|
| chr19 | 48633442-48633446   | 48633654-48633658   | - | hsa_skin_004930 | 101   | 53   | 2  | 212  | AAGG    | DBP                 | exon | B    | no   |
| chr1  | 200760837-200760838 | 200761097-200761098 | + | hsa_skin_098650 | 38    | 21   | 2  | 260  | G       | CAMSAP2             | exon | B    | no   |
| chr20 | 63202286-63202288   | 63203807-63203809   | - | hsa_skin_185622 | 37    | 28   | 2  | 1521 | AG      | YTHDF1              | exon | B    | no   |
| chr2  | 121605700-121605702 | 121606180-121606182 | - | hsa_skin_164494 | 79    | 39   | 2  | 480  | AG      | CLASP1              | exon | B    | fold |
| chr7  | 102227365-102227366 | 102227668-102227669 | + | hsa_skin_222254 | 101   | 48   | 2  | 303  | G       | CUX1                | exon | B    | no   |
| chr14 | 50150006-50150010   | 50150229-50150233   | - | hsa_skin_086492 | 329   | 146  | 2  | 223  | CAGG    | SOS2                | exon | B    | fold |
| chr1  | 24514311-24514313   | 24514565-24514567   | + | hsa_skin_224575 | 260   | 88   | 2  | 254  | AG      | RCAN3               | exon | B    | no   |
| chr8  | 101558416-101558418 | 101558810-101558812 | + | hsa_skin_048041 | 368   | 101  | 2  | 394  | AG      | GRHL2               | exon | B    | no   |
| chr14 | 32090499-32090502   | 32094384-32094387   | + | hsa_skin_055982 | 246   | 57   | 2  | 3885 | AGG     | ARHGAP5             | exon | B    | no   |
| chr22 | 40881767-40881770   | 40882175-40882178   | + | hsa_skin_158920 | 59    | 37   | 2  | 408  | AGG     | XPNPEP3             | exon | B    | no   |
| chr1  | 84865383-84865387   | 84866137-84866141   | - | hsa_skin_165206 | 350   | 145  | 2  | 754  | TAGG    | LPAR3               | exon | B    | no   |
| chr3  | 114350269-114350276 | 114351874-114351881 | - | hsa_skin_209986 | 336   | 129  | 2  | 1605 | CAGGTGA | ZBTB20              | exon | B    | no   |
| chr8  | 27294077-27294080   | 27294308-27294311   | - | hsa_skin_191860 | 139   | 82   | 2  | 231  | GGT     | TRIM35              | exon | B    | no   |
| chr12 | 122340750-122340754 | 122341695-122341699 | - | hsa_skin_183503 | 605   | 169  | 2  | 945  | AGGT    | CLIP1               | exon | B    | no   |
| chr18 | 58918270            | 58920633            | + | hsa_skin_115457 | 54    | 33   | 2  | 2363 | -       | ZNF532              | exon | B    | no   |
| chr9  | 710801-710804       | 713462-713465       | + | hsa_skin_135493 | 162   | 73   | 2  | 2661 | AGG     | KANK1               | exon | B    | no   |
| chr1  | 155521099           | 155521618           | - | hsa_skin_199419 | 67    | 36   | 2  | 519  | -       | ASH1L               | exon | B    | no   |
| chr2  | 210153492-210153494 | 210154609-210154611 | - | hsa_skin_090282 | 310   | 127  | 2  | 1117 | GT      | KANSL1L             | exon | B    | no   |
| chr16 | 68121985-68121986   | 68123120-68123121   | + | hsa_skin_090307 | 247   | 68   | 2  | 1135 | G       | NFATC3; RP11-67A1.2 | exon | B    | no   |
| chr19 | 3623685-3623689     | 3624160-3624164     | - | hsa_skin_156795 | 67    | 39   | 2  | 475  | AGGT    | CACTIN              | exon | B    | no   |
| chr9  | 37126309-37126311   | 37126940-37126942   | + | hsa_skin_051924 | 172   | 77   | 2  | 631  | AG      | ZCCHC7              | exon | B    | no   |
| chr3  | 183650293-183650295 | 183651274-183651276 | + | hsa_skin_229401 | 27    | 12   | 2  | 981  | AG      | KLHL24              | exon | B    | no   |
| chr1  | 155438326-155438328 | 155439068-155439070 | - | hsa_skin_119897 | 135   | 64   | 2  | 742  | AG      | ASH1L               | exon | B    | no   |
| chrX  | 148661907           | 148662768           | + | hsa_skin_165464 | 113   | 57   | 2  | 861  | -       | AFF2                | exon | B    | no   |
| chr11 | 33286409-33286415   | 33287508-33287514   | + | hsa_skin_080884 | 3914  | 476  | 2  | 1099 | CAGGTA  | HIPK3               | exon | B    | no   |
| chr15 | 98707561            | 98708107            | + | hsa_skin_215849 | 119   | 52   | 2  | 546  | -       | IGF1R               | exon | B    | no   |
| chr4  | 87195323-87195325   | 87195690-87195692   | - | hsa_skin_008217 | 147   | 67   | 2  | 367  | AG      | KLHL8               | exon | B    | no   |
| chr14 | 71587569-71587570   | 71589369-71589370   | + | hsa_skin_199788 | 102   | 46   | 2  | 1800 | G       | SIPA1L1             | exon | B    | no   |
| chr16 | 53155923-53155926   | 53157539-53157542   | + | hsa_skin_193893 | 184   | 52   | 2  | 1616 | AGG     | CHD9                | exon | B    | fold |
| chr2  | 32414764-32414769   | 32416159-32416164   | + | hsa_skin_083378 | 160   | 71   | 2  | 1395 | AAAGG   | BIRC6               | exon | B    | no   |
| chr17 | 19958012-19958013   | 19958570-19958571   | - | hsa_skin_033567 | 76    | 37   | 2  | 558  | G       | AKAP10              | exon | B    | no   |
| chr16 | 85633911-85633914   | 85634130-85634133   | + | hsa_skin_117924 | 310   | 106  | 2  | 219  | AGG     | GSE1                | exon | B    | no   |
| chr2  | 37316235-37316238   | 37317178-37317181   | - | hsa_skin_050529 | 1075  | 170  | 2  | 943  | AGG     | PRKD3               | exon | B    | no   |
| chr7  | 23611169-23611170   | 23611552-23611553   | + | hsa_skin_208978 | 514   | 99   | 2  | 383  | G       | CCDC126             | exon | B    | no   |
| chr14 | 34862043-34862045   | 34862322-34862324   | - | hsa_skin_062816 | 148   | 78   | 2  | 279  | AG      | BAZ1A               | exon | B    | no   |

Circular RNAs and interior circular RNAs under psoriatic skin, X. Liu *et al.*

| chrom | start               | end                 | s | name            | reads | uniq | ss | len   | SHS    | host_gene            | anno        | type | cs   |
|-------|---------------------|---------------------|---|-----------------|-------|------|----|-------|--------|----------------------|-------------|------|------|
| chr16 | 69695135            | 69695379            | + | hsa_skin_057128 | 109   | 43   | 2  | 244   | -      | NFAT5                | exon        | B    | no   |
| chr2  | 64551439-64551444   | 64553406-64553411   | + | hsa_skin_154906 | 188   | 64   | 2  | 1967  | CAGGT  | AFTPH                | exon        | B    | no   |
| chr9  | 34241183-34241184   | 34242107-34242108   | + | hsa_skin_156445 | 52    | 35   | 2  | 924   | G      | UBAP1                | exon        | B    | no   |
| chr8  | 37877105-37877109   | 37877548-37877552   | - | hsa_skin_105527 | 114   | 61   | 2  | 443   | GGTG   | RAB11FIP1            | exon        | B    | no   |
| chr6  | 106519129-106519130 | 106521452-106521453 | + | hsa_skin_056888 | 78    | 37   | 2  | 2323  | G      | AIM1                 | exon        | B    | no   |
| chr14 | 75046374-75046376   | 75049717-75049719   | - | hsa_skin_025687 | 260   | 92   | 2  | 3343  | GG     | MLH3                 | exon        | B    | no   |
| chr18 | 32287028-32287030   | 32288201-32288203   | - | hsa_skin_139144 | 40    | 26   | 2  | 1173  | GT     | GAREM                | exon        | B    | no   |
| chr22 | 20933776-20933781   | 20934242-20934247   | + | hsa_skin_171883 | 106   | 53   | 2  | 466   | AGGTA  | CRKL                 | exon        | B    | no   |
| chr15 | 101235081-101235083 | 101235577-101235579 | - | hsa_skin_186182 | 109   | 53   | 2  | 496   | AG     | CHSY1                | exon        | B    | no   |
| chr9  | 112574054-112574057 | 112575249-112575252 | + | hsa_skin_105944 | 51    | 38   | 2  | 1195  | AGG    | KIAA1958             | exon        | B    | no   |
| chr14 | 64521484-64521488   | 64523400-64523404   | + | hsa_skin_001742 | 90    | 46   | 2  | 1916  | AGGT   | ZBTB1                | exon        | B    | no   |
| chr15 | 41668826-41668828   | 41669957-41669959   | + | hsa_skin_023883 | 775   | 152  | 2  | 1131  | GG     | MGA                  | exon        | B    | no   |
| chr6  | 16326393-16326398   | 16328470-16328475   | - | hsa_skin_127186 | 114   | 66   | 2  | 2077  | CCCAG  | ATXN1                | exon        | B    | no   |
| chr16 | 3850296-3850298     | 3851009-3851011     | - | hsa_skin_048346 | 286   | 121  | 2  | 713   | AG     | CREBBP               | exon        | B    | no   |
| chr17 | 59353212-59353215   | 59353524-59353527   | + | hsa_skin_039912 | 138   | 57   | 2  | 312   | AGG    | YPEL2                | exon        | B    | no   |
| chr12 | 116230531-116230535 | 116237704-116237708 | - | hsa_skin_129279 | 56    | 33   | 2  | 7173  | CAGG   | MED13L               | intron-exon | 5' B | no   |
| chr7  | 139715928-139715933 | 139717012-139717017 | - | hsa_skin_232176 | 110   | 65   | 2  | 1084  | AGGTA  | HIPK2                | intron-exon | 5' B | no   |
| chr10 | 20957728-20957731   | 20961777-20961780   | - | hsa_skin_108592 | 46    | 25   | 2  | 4049  | GGT    | NEBL                 | intron-exon | 5' B | no   |
| chr12 | 109852141-109852147 | 109853437-109853443 | - | hsa_skin_063495 | 37    | 19   | 0  | 1296  | GCTGGG | GLTP                 | exon        | I    | fold |
| chr11 | 119068010-119068014 | 119069195-119069199 | + | hsa_skin_132621 | 15    | 8    | 0  | 1185  | ATAT   | VPS11                | intron      | B    | no   |
| chr1  | 92836390-92836392   | 92837453-92837455   | + | hsa_skin_060951 | 22    | 14   | 0  | 1063  | AG     | RPL5; SNORD21        | intron      | B    | no   |
| chr16 | 53141174-53141178   | 53157537-53157541   | + | hsa_skin_119115 | 322   | 82   | 2  | 16363 | ACAG   | CHD9                 | intron-exon | 3' B | no   |
| chr11 | 36227082-36227084   | 36227428-36227430   | + | hsa_skin_176158 | 197   | 70   | 2  | 346   | AG     | LDLRAD3              | intron-exon | 3' B | no   |
| chr9  | 33293676-33293680   | 33295424-33295428   | + | hsa_skin_044188 | 128   | 58   | 2  | 1748  | CAGG   | NFX1                 | intron-exon | 3' B | no   |
| chr5  | 36982162-36982165   | 36986299-36986302   | + | hsa_skin_017868 | 181   | 45   | 2  | 4137  | AGG    | NIPBL                | intron-exon | 3' B | no   |
| chr11 | 19159809-19159815   | 19160675-19160681   | + | hsa_skin_120213 | 96    | 36   | 0  | 866   | GGTTAC | ZDHHC13              | intron      | I    | fold |
| chr5  | 158941693-158941696 | 158941979-158941982 | - | hsa_skin_203753 | 112   | 42   | 2  | 286   | CAG    | EBF1                 | intron      | I    | no   |
| chr7  | 99493037-99493042   | 99494629-99494634   | - | hsa_skin_112754 | 308   | 108  | 2  | 1592  | CAGGT  | ZNF394               | intron      | I    | no   |
| chr8  | 141253988-141253989 | 141254629-141254630 | - | hsa_skin_124307 | 390   | 141  | 2  | 641   | G      | SLC45A4              | intron      | I    | no   |
| chr6  | 158312048-158312050 | 158314266-158314268 | + | hsa_skin_043418 | 1363  | 240  | 2  | 2218  | AG     | RP11-732M18.4; TULP4 | intron      | I    | no   |
| chr11 | 3811755-3811759     | 3812083-3812087     | + | hsa_skin_100269 | 41    | 26   | 0  | 328   | TGTC   | PGAP2                | intron      | I    | fold |
| chr20 | 43587212-43587218   | 43587378-43587384   | + | hsa_skin_020512 | 20    | 9    | 0  | 166   | GCTGGG | SGK2                 | intron      | I    | fold |
| chr2  | 113707872-113707876 | 113708437-113708441 | - | hsa_skin_143837 | 24    | 15   | 0  | 565   | TGAG   | SLC35F5              | intron      | I    | fold |
| chr22 | 24573141-24573145   | 24574592-24574596   | + | hsa_skin_201121 | 69    | 23   | 0  | 1451  | TGCA   | SNRPD3               | intron      | I    | fold |
| chr20 | 62276203-62276204   | 62276962-62276963   | + | hsa_skin_130118 | 32    | 15   | 0  | 759   | A      | OSBPL2               | intron      | I    | fold |

Circular RNAs and interior circular RNAs under psoriatic skin, X. Liu *et al.*

| chrom | start               | end                 | s | name            | reads | uniq | ss | len  | SHS      | host_gene                                                | anno       | type | cs   |
|-------|---------------------|---------------------|---|-----------------|-------|------|----|------|----------|----------------------------------------------------------|------------|------|------|
| chr20 | 3218514-3218518     | 3218992-3218996     | + | hsa_skin_137810 | 47    | 24   | 2  | 478  | AGGT     | ITPA                                                     | exon       | 5' B | no   |
| chr10 | 92450736-92450738   | 92451257-92451259   | - | hsa_skin_228653 | 25    | 15   | 0  | 521  | GA       | -                                                        | intergenic | I    | no   |
| chr10 | 92450725-92450733   | 92451246-92451254   | - | hsa_skin_098241 | 57    | 27   | 0  | 521  | CAGGCATG | -                                                        | intergenic | I    | fold |
| chr4  | 86822780-86822784   | 86823096-86823100   | - | hsa_skin_081592 | 87    | 40   | 0  | 316  | CATG     | -                                                        | intergenic | I    | fold |
| chr19 | 52383847-52383848   | 52385323-52385324   | + | hsa_skin_102568 | 25    | 13   | 2  | 1476 | G        | ZNF880                                                   | exon       | 5' B | no   |
| chr6  | 106568470-106568472 | 106568970-106568972 | + | hsa_skin_188406 | 47    | 29   | 2  | 500  | GG       | AIM1                                                     | exon       | 5' B | no   |
| chr9  | 4860124-4860125     | 4860901-4860902     | + | hsa_skin_050166 | 118   | 51   | 2  | 777  | G        | RCL1                                                     | exon       | 5' B | no   |
| chr9  | 127444025-127444029 | 127445246-127445250 | + | hsa_skin_028220 | 49    | 26   | 2  | 1221 | CAGG     | ZNF79                                                    | exon       | 5' B | fold |
| chr17 | 40818300-40818303   | 40818481-40818484   | - | hsa_skin_108296 | 142   | 51   | 0  | 181  | AGA      | KRT10                                                    | exon       | 5' B | no   |
| chr17 | 76007059-76007062   | 76010543-76010546   | - | hsa_skin_194492 | 81    | 52   | 2  | 3484 | CAG      | EVPL                                                     | exon       | 5' B | no   |
| chr14 | 89411932-89411935   | 89412489-89412492   | - | hsa_skin_093345 | 88    | 61   | 2  | 557  | AGG      | FOXN3;<br>RP11-33N16.3                                   | exon       | 5' B | no   |
| chr16 | 16141172-16141173   | 16142942-16142943   | + | hsa_skin_146560 | 54    | 24   | 2  | 1770 | G        | ABCC1                                                    | exon       | 5' B | no   |
| chr11 | 130260854-130260858 | 130261928-130261932 | - | hsa_skin_102236 | 1169  | 240  | 2  | 1074 | TAGG     | ZBTB44                                                   | exon       | 5' B | no   |
| chr15 | 64499290-64499292   | 64500164-64500166   | + | hsa_skin_164127 | 1378  | 328  | 2  | 874  | AG       | ZNF609                                                   | exon       | 5' B | no   |
| chr12 | 1027744-1027747     | 1028569-1028572     | + | hsa_skin_183280 | 470   | 151  | 2  | 825  | CAG      | ERC1                                                     | exon       | 5' B | no   |
| chr15 | 72045723-72045725   | 72046634-72046636   | - | hsa_skin_173421 | 140   | 61   | 2  | 911  | AG       | MYO9A                                                    | exon       | 5' B | no   |
| chr19 | 52383847-52383848   | 52385741-52385742   | + | hsa_skin_220483 | 58    | 27   | 2  | 1894 | G        | ZNF880                                                   | exon       | 5' B | no   |
| chr6  | 89083752-89083754   | 89084643-89084645   | + | hsa_skin_184272 | 245   | 82   | 2  | 891  | GT       | PNRC1                                                    | exon       | 5' B | no   |
| chr19 | 58260847-58260850   | 58263673-58263676   | + | hsa_skin_039493 | 159   | 82   | 2  | 2826 | CAG      | ZNF544                                                   | exon       | 5' B | no   |
| chr17 | 40818151-40818157   | 40818475-40818481   | - | hsa_skin_214394 | 78    | 15   | 0  | 324  | TACTAA   | KRT10                                                    | exon       | 5' B | no   |
| chr17 | 7576810             | 7576951             | + | hsa_skin_036960 | 31    | 6    | 0  | 141  | -        | EIF4A1;<br>RP11-186B7.4;<br>SENP3-<br>EIF4A1;<br>SNORD10 | exon       | 5' B | no   |
| chr19 | 23358426-23358431   | 23362722-23362727   | - | hsa_skin_107727 | 903   | 166  | 2  | 4296 | AGGTA    | ZNF91                                                    | exon       | 5' B | no   |
| chr18 | 75285445-75285447   | 75288646-75288648   | + | hsa_skin_010497 | 28    | 16   | 2  | 3201 | AG       | TSHZ1                                                    | exon       | 5' B | no   |

**Table S3 Genes significantly differentially expressed between PP and NN**

Only genes with fold change  $\geq 2$  or  $\leq -2$ , and q\_value  $\leq 0.01$  are listed due to the large amount.

| gene_id     | gene                  | locus                    | NN    | PP       | log2(fold_change) | p_value | q_value |
|-------------|-----------------------|--------------------------|-------|----------|-------------------|---------|---------|
| XLOC_060937 | DEFB4A                | chr8:7894628-7896711     | 0.49  | 1552.09  | 11.62             | 0.00    | 0.00    |
| XLOC_002649 | IL19                  | chr1:206767601-206842981 | 0.00  | 6.88     | 10.73             | 0.00    | 0.00    |
| XLOC_004974 | SPRR2F                | chr1:153092172-153150872 | 0.39  | 521.29   | 10.39             | 0.00    | 0.00    |
| XLOC_034142 | IL36A                 | chr2:113005306-113012244 | 0.03  | 29.27    | 10.10             | 0.00    | 0.00    |
| XLOC_001909 | S100A7A               | chr1:153416523-153423225 | 0.47  | 271.72   | 9.16              | 0.00    | 0.00    |
| XLOC_021769 | -                     | chr15:32700980-32701376  | 0.01  | 3.24     | 9.13              | 0.00    | 0.00    |
| XLOC_004971 | SPRR2A                | chr1:153056112-153057537 | 4.07  | 2143.20  | 9.04              | 0.00    | 0.00    |
| XLOC_004976 | SPRR2C                | chr1:153092172-153150872 | 0.05  | 16.98    | 8.45              | 0.00    | 0.00    |
| XLOC_011558 | TCN1                  | chr11:59852799-59866575  | 0.28  | 93.19    | 8.40              | 0.00    | 0.00    |
| XLOC_038755 | PI3                   | chr20:45174875-45176544  | 7.43  | 2067.88  | 8.12              | 0.00    | 0.00    |
| XLOC_035681 | -                     | chr2:10902893-10903530   | 0.00  | 1.21     | 8.12              | 0.00    | 0.00    |
| XLOC_004992 | S100A8                | chr1:153390031-153391188 | 86.70 | 23819.90 | 8.10              | 0.00    | 0.00    |
| XLOC_004955 | LCE3A                 | chr1:152622600-152624052 | 0.92  | 239.97   | 8.03              | 0.00    | 0.00    |
| XLOC_001907 | S100A9                | chr1:153357853-153361027 | 83.81 | 21838.20 | 8.03              | 0.00    | 0.00    |
| XLOC_047028 | CXCL8                 | chr4:73740505-73743716   | 0.10  | 25.50    | 7.94              | 0.00    | 0.00    |
| XLOC_004972 | SPRR2B                | chr1:153070223-153072162 | 3.86  | 945.43   | 7.93              | 0.00    | 0.00    |
| XLOC_004989 | S100A12               | chr1:153373705-153375649 | 0.28  | 68.02    | 7.93              | 0.00    | 0.00    |
| XLOC_057190 | AGPAT4                | chr6:160990317-161288561 | 0.01  | 1.23     | 7.91              | 0.00    | 0.00    |
| XLOC_049116 | TNIP3                 | chr4:121129120-121227466 | 0.02  | 5.96     | 7.91              | 0.00    | 0.00    |
| XLOC_032360 | CTC-490G23.2          | chr19:43329294-43331430  | 0.01  | 2.94     | 7.85              | 0.00    | 0.00    |
| XLOC_009616 | -                     | chr11:47910012-47910294  | 0.02  | 5.17     | 7.81              | 0.00    | 0.00    |
| XLOC_004997 | S100A7                | chr1:153457743-153460701 | 64.05 | 13102.10 | 7.68              | 0.00    | 0.00    |
| XLOC_010374 | -                     | chr11:94115643-94128772  | 0.01  | 1.47     | 7.55              | 0.00    | 0.00    |
| XLOC_001898 | SPRR3                 | chr1:152984035-153032902 | 0.01  | 1.84     | 7.53              | 0.00    | 0.00    |
| XLOC_029819 | SERPINB3,<br>SERPINB4 | chr18:63634977-63726432  | 9.61  | 1630.12  | 7.41              | 0.00    | 0.00    |
| XLOC_022582 | RHCG                  | chr15:89471397-89496613  | 1.10  | 158.71   | 7.17              | 0.00    | 0.00    |
| XLOC_048635 | TMPRSS11D             | chr4:67701213-68133166   | 0.16  | 23.07    | 7.17              | 0.00    | 0.00    |
| XLOC_010373 | HEPHL1                | chr11:94021360-94113751  | 0.46  | 65.84    | 7.15              | 0.00    | 0.00    |
| XLOC_056564 | -                     | chr6:106860623-106872275 | 0.01  | 0.75     | 7.10              | 0.00    | 0.01    |
| XLOC_015050 | KRT6A                 | chr12:52446650-52493257  | 1.44  | 192.10   | 7.06              | 0.00    | 0.00    |
| XLOC_002650 | IL20                  | chr1:206863384-206869389 | 0.02  | 3.01     | 7.00              | 0.00    | 0.00    |
| XLOC_023603 | CNGB1                 | chr16:57881681-57971116  | 0.01  | 1.39     | 6.69              | 0.00    | 0.01    |
| XLOC_021139 | -                     | chr15:70190114-70302720  | 0.02  | 2.06     | 6.66              | 0.00    | 0.00    |
| XLOC_024043 | CTD-2555A7.2          | chr16:89046171-89059251  | 0.01  | 0.74     | 6.65              | 0.00    | 0.00    |
| XLOC_056796 | VNN3                  | chr6:132720559-132734765 | 0.07  | 6.56     | 6.64              | 0.00    | 0.00    |

Circular RNAs and interior circular RNAs under psoriatic skin, X. Liu *et al.*

| gene_id     | gene       | locus                     | NN     | PP      | log2(fold_change) | p_value | q_value |
|-------------|------------|---------------------------|--------|---------|-------------------|---------|---------|
| XLOC_022581 | -          | chr15:89451829-89470044   | 0.02   | 2.28    | 6.61              | 0.00    | 0.00    |
| XLOC_056030 | ADGRF1     | chr6:46997702-47042363    | 0.02   | 1.79    | 6.38              | 0.00    | 0.00    |
| XLOC_027384 | KRT16P3    | chr17:20449394-20699914   | 0.01   | 0.78    | 6.38              | 0.00    | 0.00    |
| XLOC_003952 | CYP4Z2P    | chr1:46749643-47180339    | 0.02   | 1.71    | 6.36              | 0.00    | 0.00    |
| XLOC_004969 | SPRR2D     | chr1:153039724-153041931  | 15.08  | 1217.52 | 6.33              | 0.00    | 0.00    |
| XLOC_022268 | -          | chr15:66887508-66896506   | 0.02   | 1.90    | 6.33              | 0.00    | 0.00    |
| XLOC_029101 | SERPINB11  | chr18:63634977-63726432   | 6.24   | 485.71  | 6.28              | 0.00    | 0.00    |
| XLOC_059615 | C7orf57    | chr7:48035510-48061304    | 0.03   | 2.33    | 6.27              | 0.00    | 0.00    |
| XLOC_004953 | LCE3E      | chr1:152510745-152601086  | 4.81   | 361.25  | 6.23              | 0.00    | 0.00    |
| XLOC_047035 | CXCL1      | chr4:73869392-73871242    | 0.14   | 10.41   | 6.22              | 0.00    | 0.00    |
| XLOC_048636 | TMPRSS11A  | chr4:67701213-68133166    | 0.01   | 0.99    | 6.20              | 0.00    | 0.00    |
| XLOC_025752 | KRT16P1    | chr17:18432050-18442994   | 0.04   | 2.62    | 6.04              | 0.00    | 0.00    |
| XLOC_040700 | CLDN17     | chr21:30164327-30167091   | 0.07   | 4.57    | 6.02              | 0.00    | 0.00    |
| XLOC_020708 | CHAC1      | chr15:40952961-40957811   | 0.30   | 18.79   | 5.96              | 0.00    | 0.00    |
| XLOC_061159 | ADAMDEC1   | chr8:24294039-24912073    | 0.02   | 1.35    | 5.93              | 0.00    | 0.00    |
| XLOC_004954 | LCE3D      | chr1:152510745-152601086  | 16.39  | 994.48  | 5.92              | 0.00    | 0.00    |
| XLOC_030897 | CD177      | chr19:43353658-43368970   | 0.04   | 2.19    | 5.91              | 0.00    | 0.00    |
| XLOC_012170 | PHBP16     | chr11:94021360-94113751   | 0.02   | 0.96    | 5.89              | 0.00    | 0.00    |
| XLOC_016927 | -          | chr13:20330950-20402282   | 0.02   | 0.97    | 5.88              | 0.00    | 0.00    |
| XLOC_029818 | SERPINB4   | chr18:63634977-63726432   | 1.90   | 109.49  | 5.85              | 0.00    | 0.00    |
| XLOC_065058 | LCN2       | chr9:128149070-128153455  | 3.46   | 192.21  | 5.80              | 0.00    | 0.00    |
| XLOC_058723 | AKR1B10    | chr7:134527557-134541549  | 2.11   | 111.91  | 5.73              | 0.00    | 0.00    |
| XLOC_008516 | -          | chr10:84166690-84172816   | 0.03   | 1.59    | 5.71              | 0.00    | 0.00    |
| XLOC_015051 | KRT6C      | chr12:52446650-52493257   | 6.53   | 305.72  | 5.55              | 0.00    | 0.00    |
| XLOC_055798 | -          | chr6:31853374-31853595    | 0.06   | 2.81    | 5.52              | 0.00    | 0.00    |
| XLOC_043188 | -          | chr3:71897133-71899275    | 0.03   | 1.36    | 5.52              | 0.00    | 0.01    |
| XLOC_058724 | AKR1B15    | chr7:134549106-134579875  | 0.08   | 3.67    | 5.44              | 0.00    | 0.00    |
| XLOC_034386 | KYNU       | chr2:142877276-143055832  | 0.82   | 34.43   | 5.40              | 0.00    | 0.00    |
| XLOC_015052 | KRT6A      | chr12:52446650-52493257   | 100.67 | 4023.08 | 5.32              | 0.00    | 0.00    |
| XLOC_030979 | IGFL1      | chr19:46078815-46250270   | 0.66   | 25.51   | 5.27              | 0.00    | 0.00    |
| XLOC_016176 | ATP12A     | chr13:24680410-24716604   | 1.87   | 71.45   | 5.26              | 0.00    | 0.00    |
| XLOC_015873 | OASL       | chr12:121017487-121039242 | 0.47   | 17.01   | 5.19              | 0.00    | 0.00    |
| XLOC_018812 | IFI27      | chr14:94104488-94116725   | 34.16  | 1192.60 | 5.13              | 0.00    | 0.00    |
| XLOC_057827 | AC004870.5 | chr7:46890624-47079128    | 0.03   | 1.15    | 5.11              | 0.00    | 0.00    |
| XLOC_010607 | ABCG4      | chr11:119149011-119162654 | 0.08   | 2.72    | 5.10              | 0.00    | 0.00    |
| XLOC_044806 | LTF        | chr3:46435520-46485234    | 1.60   | 54.26   | 5.08              | 0.00    | 0.00    |
| XLOC_032223 | -          | chr19:38797508-38798775   | 0.15   | 5.15    | 5.08              | 0.00    | 0.00    |
| XLOC_064440 | GDA        | chr9:72114594-72257193    | 0.50   | 17.01   | 5.08              | 0.00    | 0.00    |



Circular RNAs and interior circular RNAs under psoriatic skin, X. Liu *et al.*

| gene_id     | gene                | locus                     | NN     | PP      | log2(fold_change) | p_value | q_value |
|-------------|---------------------|---------------------------|--------|---------|-------------------|---------|---------|
| XLOC_005658 | REN                 | chr1:204153763-204166322  | 0.06   | 1.86    | 5.05              | 0.00    | 0.00    |
| XLOC_012228 | MMP1                | chr11:102746967-102843803 | 0.03   | 0.90    | 5.04              | 0.00    | 0.00    |
| XLOC_027642 | CCL3L3              | chr17:36116176-36264553   | 0.06   | 1.87    | 5.02              | 0.00    | 0.00    |
| XLOC_016925 | GJB2                | chr13:20184110-20192967   | 31.36  | 981.98  | 4.97              | 0.00    | 0.00    |
| XLOC_007122 | C10orf99            | chr10:84173717-84190044   | 7.49   | 229.47  | 4.94              | 0.00    | 0.00    |
| XLOC_068139 | SLC6A14             | chrX:116436443-116461556  | 3.05   | 92.37   | 4.92              | 0.00    | 0.00    |
| XLOC_038245 | TGM6                | chr20:2380870-2435307     | 0.07   | 2.11    | 4.91              | 0.00    | 0.00    |
| XLOC_062363 | DEFB103B            | chr8:7426692-7430348      | 0.05   | 1.23    | 4.77              | 0.00    | 0.00    |
| XLOC_039864 | HRH3                | chr20:62214962-62221841   | 0.04   | 0.97    | 4.76              | 0.00    | 0.00    |
| XLOC_035394 | CCL20               | chr2:227813841-227817564  | 0.48   | 12.83   | 4.75              | 0.00    | 0.00    |
| XLOC_014140 | CCDC60              | chr12:119334711-119682273 | 0.03   | 0.91    | 4.75              | 0.00    | 0.00    |
| XLOC_044493 | SLC6A11             | chr3:10816026-10941067    | 0.04   | 0.93    | 4.71              | 0.00    | 0.00    |
| XLOC_026069 | CCL4L2              | chr17:36116176-36264553   | 0.08   | 2.06    | 4.70              | 0.00    | 0.00    |
| XLOC_009487 | RP4-743O11.1        | chr11:34727049-34754578   | 0.14   | 3.65    | 4.70              | 0.00    | 0.00    |
| XLOC_058598 | HYAL4               | chr7:123814138-123877823  | 0.32   | 7.91    | 4.64              | 0.00    | 0.00    |
| XLOC_034086 | -                   | chr2:110321522-110345715  | 0.06   | 1.41    | 4.63              | 0.00    | 0.00    |
| XLOC_021135 | RNU6-745P           | chr15:70190114-70302720   | 0.13   | 3.29    | 4.63              | 0.00    | 0.00    |
| XLOC_055320 | RP4-529N6.2         | chr6:4599286-4602420      | 0.51   | 12.24   | 4.58              | 0.00    | 0.00    |
| XLOC_062160 | -                   | chr8:140646162-140646439  | 0.36   | 8.65    | 4.58              | 0.00    | 0.00    |
| XLOC_004973 | SPRR2E,<br>SPRR2G   | chr1:153092172-153150872  | 179.67 | 4251.19 | 4.56              | 0.00    | 0.00    |
| XLOC_024190 | PRSS27              | chr16:2712417-2720803     | 1.85   | 43.16   | 4.55              | 0.00    | 0.00    |
| XLOC_036791 | -                   | chr2:110042108-110050039  | 0.06   | 1.33    | 4.49              | 0.00    | 0.00    |
| XLOC_001548 | CHI3L2              | chr1:111117332-111243440  | 5.36   | 119.70  | 4.48              | 0.00    | 0.00    |
| XLOC_027302 | KRT16P2,<br>KRT16P6 | chr17:16817982-16832830   | 0.34   | 7.60    | 4.47              | 0.00    | 0.00    |
| XLOC_026064 | CCL4                | chr17:36103589-36105621   | 0.12   | 2.61    | 4.45              | 0.00    | 0.00    |
| XLOC_027640 | CCL3                | chr17:36072717-36091012   | 0.16   | 3.43    | 4.45              | 0.00    | 0.00    |
| XLOC_032222 | RNU6-140P           | chr19:38791952-38797411   | 0.04   | 0.86    | 4.41              | 0.00    | 0.00    |
| XLOC_024199 | PRSS22              | chr16:2852726-2859726     | 2.04   | 43.33   | 4.41              | 0.00    | 0.00    |
| XLOC_009071 | KRTAP5-AS1          | chr11:1554043-1600142     | 0.04   | 0.84    | 4.40              | 0.00    | 0.00    |
| XLOC_030899 | TEX101              | chr19:43395738-43418597   | 0.07   | 1.47    | 4.39              | 0.00    | 0.00    |
| XLOC_010523 | HTR3A               | chr11:113974880-113990313 | 0.32   | 6.56    | 4.34              | 0.00    | 0.00    |
| XLOC_032578 | KLK6                | chr19:50941230-51020175   | 4.27   | 84.52   | 4.31              | 0.00    | 0.00    |
| XLOC_042476 | CTA-384D8.35        | chr22:50542058-50547852   | 0.28   | 5.34    | 4.27              | 0.00    | 0.00    |
| XLOC_020660 | -                   | chr15:38610131-38651319   | 0.10   | 1.95    | 4.27              | 0.00    | 0.00    |
| XLOC_048733 | CXCL9               | chr4:75910871-76007488    | 0.20   | 3.83    | 4.25              | 0.00    | 0.00    |
| XLOC_047038 | EPGN                | chr4:74308223-74323535    | 0.67   | 12.55   | 4.23              | 0.00    | 0.00    |
| XLOC_056815 | RP11-557H15.3       | chr6:134428037-134524383  | 0.14   | 2.61    | 4.20              | 0.00    | 0.00    |

Circular RNAs and interior circular RNAs under psoriatic skin, X. Liu *et al.*

| gene_id     | gene                          | locus                     | NN    | PP      | log2(fold_change) | p_value | q_value |
|-------------|-------------------------------|---------------------------|-------|---------|-------------------|---------|---------|
| XLOC_001897 | SPRR1A,<br>SPRR1B             | chr1:152984035-153032902  | 78.04 | 1421.88 | 4.19              | 0.00    | 0.00    |
| XLOC_042059 | -                             | chr22:24790469-24790786   | 0.20  | 3.69    | 4.18              | 0.00    | 0.00    |
| XLOC_039828 | ZBP1                          | chr20:57603845-57620576   | 0.10  | 1.84    | 4.18              | 0.00    | 0.00    |
| XLOC_041822 | CTA-384D8.31,<br>CTA-384D8.34 | chr22:50542058-50547852   | 0.20  | 3.62    | 4.17              | 0.00    | 0.00    |
| XLOC_056794 | VNN1                          | chr6:132681467-132714049  | 0.20  | 3.54    | 4.16              | 0.00    | 0.00    |
| XLOC_042972 | CAMP                          | chr3:48223346-48225491    | 0.06  | 1.13    | 4.16              | 0.00    | 0.00    |
| XLOC_063840 | CD274                         | chr9:5439195-5833117      | 0.35  | 6.32    | 4.16              | 0.00    | 0.00    |
| XLOC_018601 | LINC01269                     | chr14:70681937-70714872   | 0.10  | 1.69    | 4.14              | 0.00    | 0.00    |
| XLOC_057834 | UPP1                          | chr7:48088627-48108734    | 2.07  | 36.32   | 4.13              | 0.00    | 0.00    |
| XLOC_019921 | KCNK10                        | chr14:88175390-88327481   | 0.09  | 1.58    | 4.08              | 0.00    | 0.00    |
| XLOC_052738 | PITX1                         | chr5:135027341-135401296  | 0.88  | 14.11   | 4.01              | 0.00    | 0.00    |
| XLOC_021937 | PLA2G4D                       | chr15:42064650-42094651   | 7.94  | 125.89  | 3.99              | 0.00    | 0.00    |
| XLOC_065918 | TJP2                          | chr9:69121110-69255208    | 0.07  | 1.15    | 3.97              | 0.00    | 0.00    |
| XLOC_004946 | HRNR                          | chr1:152122533-152445456  | 0.54  | 8.41    | 3.97              | 0.00    | 0.00    |
| XLOC_041561 | APOL1                         | chr22:36253009-36267530   | 0.99  | 15.40   | 3.96              | 0.00    | 0.00    |
| XLOC_000926 | FAAHP1                        | chr1:46423797-46482493    | 0.12  | 1.80    | 3.96              | 0.00    | 0.00    |
| XLOC_042144 | OSM                           | chr22:30262754-30266911   | 0.08  | 1.24    | 3.95              | 0.00    | 0.00    |
| XLOC_003606 | IFI6                          | chr1:27666060-27703063    | 17.77 | 273.41  | 3.94              | 0.00    | 0.00    |
| XLOC_040936 | -                             | chr21:43300384-43303838   | 0.08  | 1.21    | 3.93              | 0.00    | 0.01    |
| XLOC_041823 | KLHDC7B                       | chr22:50547966-50551023   | 0.09  | 1.30    | 3.92              | 0.00    | 0.00    |
| XLOC_019275 | GZMB                          | chr14:24595722-24657774   | 0.28  | 4.22    | 3.92              | 0.00    | 0.00    |
| XLOC_019941 | CTD-2547L24.4                 | chr14:91255833-91259003   | 0.08  | 1.13    | 3.90              | 0.00    | 0.01    |
| XLOC_000460 | EPHB2                         | chr1:22710838-22921500    | 0.63  | 9.37    | 3.89              | 0.00    | 0.00    |
| XLOC_007932 | ENKUR                         | chr10:24843535-25062477   | 0.07  | 0.97    | 3.89              | 0.00    | 0.00    |
| XLOC_015049 | KRT6B                         | chr12:52446650-52493257   | 59.80 | 866.90  | 3.86              | 0.00    | 0.00    |
| XLOC_011676 | BATF2                         | chr11:64987847-64997211   | 0.15  | 2.22    | 3.85              | 0.00    | 0.00    |
| XLOC_012230 | MMP3                          | chr11:102746967-102843803 | 0.05  | 0.74    | 3.85              | 0.00    | 0.00    |
| XLOC_061891 | LINC01181                     | chr8:103121031-103335268  | 0.35  | 5.02    | 3.84              | 0.00    | 0.00    |
| XLOC_051335 | HRH2                          | chr5:175657798-175719643  | 0.55  | 7.80    | 3.84              | 0.00    | 0.00    |
| XLOC_051305 | CTB-33O18.1                   | chr5:173561391-173574283  | 0.08  | 1.09    | 3.83              | 0.00    | 0.00    |
| XLOC_000038 | ISG15                         | chr1:1001137-1014541      | 4.13  | 58.53   | 3.83              | 0.00    | 0.00    |
| XLOC_014070 | OAS2                          | chr12:112906776-113017751 | 1.40  | 19.79   | 3.82              | 0.00    | 0.00    |
| XLOC_025753 | LGALS9C                       | chr17:18450243-18494945   | 0.15  | 2.19    | 3.82              | 0.00    | 0.00    |
| XLOC_031586 | FUT3                          | chr19:5842179-5858239     | 0.73  | 10.13   | 3.80              | 0.00    | 0.00    |
| XLOC_021542 | ALDH1A3                       | chr15:100849560-101086066 | 1.19  | 16.51   | 3.79              | 0.00    | 0.00    |
| XLOC_057742 | TRG-AS1                       | chr7:38239579-38378804    | 0.14  | 1.94    | 3.77              | 0.00    | 0.00    |
| XLOC_014540 | CLEC7A                        | chr12:10116776-10130258   | 2.69  | 36.49   | 3.76              | 0.00    | 0.00    |

Circular RNAs and interior circular RNAs under psoriatic skin, X. Liu *et al.*

| gene_id     | gene                                          | locus                     | NN     | PP      | log2(fold_change) | p_value | q_value |
|-------------|-----------------------------------------------|---------------------------|--------|---------|-------------------|---------|---------|
| XLOC_055039 | RP11-350J20.12                                | chr6:149724314-149923121  | 3.82   | 51.75   | 3.76              | 0.00    | 0.00    |
| XLOC_032585 | KLK13                                         | chr19:51055405-51069556   | 5.03   | 67.54   | 3.75              | 0.00    | 0.00    |
| XLOC_048734 | CXCL10                                        | chr4:76011183-76112802    | 0.76   | 10.04   | 3.73              | 0.00    | 0.00    |
| XLOC_046459 | S100P                                         | chr4:6693068-6697170      | 6.19   | 82.19   | 3.73              | 0.00    | 0.00    |
| XLOC_035156 | ADAM23                                        | chr2:206443503-206621277  | 0.26   | 3.48    | 3.73              | 0.00    | 0.00    |
| XLOC_007779 | PRKCQ                                         | chr10:6394335-6616452     | 0.18   | 2.41    | 3.72              | 0.00    | 0.00    |
| XLOC_008577 | HTR7                                          | chr10:90739646-90857865   | 0.09   | 1.23    | 3.72              | 0.00    | 0.00    |
| XLOC_001268 | IFI44,IFI44L                                  | chr1:78619921-78664373    | 3.36   | 43.60   | 3.70              | 0.00    | 0.00    |
| XLOC_040307 | MX1                                           | chr21:41420303-41459214   | 4.62   | 59.82   | 3.70              | 0.00    | 0.00    |
| XLOC_049593 | -                                             | chr4:183329999-183350835  | 0.10   | 1.28    | 3.69              | 0.00    | 0.00    |
| XLOC_042474 | ODF3B,<br>SCO2,<br>TYMP                       | chr22:50523567-50532580   | 29.46  | 366.53  | 3.64              | 0.00    | 0.00    |
| XLOC_005986 | PGBD5                                         | chr1:230314454-230425729  | 0.38   | 4.65    | 3.63              | 0.00    | 0.00    |
| XLOC_032916 | RSAD2                                         | chr2:6840569-6898239      | 0.68   | 8.34    | 3.63              | 0.00    | 0.00    |
| XLOC_027254 | HS3ST3A1                                      | chr17:13492712-13601997   | 0.26   | 3.17    | 3.61              | 0.00    | 0.00    |
| XLOC_048735 | CXCL11                                        | chr4:76011183-76112802    | 0.07   | 0.88    | 3.59              | 0.00    | 0.00    |
| XLOC_055724 | TRIM10                                        | chr6:30151882-30172696    | 0.12   | 1.49    | 3.58              | 0.00    | 0.00    |
| XLOC_064447 | TMC1                                          | chr9:72521800-72836351    | 0.10   | 1.16    | 3.57              | 0.00    | 0.00    |
| XLOC_011555 | FABP5P7                                       | chr11:59712822-59806024   | 0.62   | 7.34    | 3.57              | 0.00    | 0.00    |
| XLOC_016926 | GJB6                                          | chr13:20221960-20233032   | 28.10  | 332.89  | 3.57              | 0.00    | 0.00    |
| XLOC_039903 | SRMS                                          | chr20:63538369-63547736   | 0.29   | 3.33    | 3.51              | 0.00    | 0.00    |
| XLOC_067067 | -                                             | chrX:7040872-7446415      | 0.16   | 1.79    | 3.50              | 0.00    | 0.00    |
| XLOC_030773 | PAPL                                          | chr19:38990713-39117070   | 6.02   | 67.73   | 3.49              | 0.00    | 0.00    |
| XLOC_036838 | HMG2P23                                       | chr2:112882045-112985723  | 0.23   | 2.61    | 3.48              | 0.00    | 0.00    |
| XLOC_061670 | FABP5                                         | chr8:81279870-81284777    | 181.21 | 2018.80 | 3.48              | 0.00    | 0.00    |
| XLOC_048951 | ADH7                                          | chr4:99412233-99438578    | 0.32   | 3.47    | 3.46              | 0.00    | 0.00    |
| XLOC_006343 | PRKCQ-AS1                                     | chr10:6394335-6616452     | 0.40   | 4.40    | 3.46              | 0.00    | 0.00    |
| XLOC_062782 | PLAT                                          | chr8:42175232-42271263    | 2.62   | 28.53   | 3.45              | 0.00    | 0.00    |
| XLOC_002556 | ELF3                                          | chr1:201982371-202017188  | 2.04   | 22.26   | 3.45              | 0.00    | 0.00    |
| XLOC_005230 | ADAMTS4                                       | chr1:161184252-161214468  | 0.16   | 1.77    | 3.45              | 0.00    | 0.00    |
| XLOC_001892 | -                                             | chr1:152859986-152861423  | 0.33   | 3.48    | 3.42              | 0.00    | 0.00    |
| XLOC_067049 | ARSF                                          | chrX:3041372-3112891      | 1.74   | 18.47   | 3.40              | 0.00    | 0.00    |
| XLOC_062713 | LINC01605,<br>RP11-150O12.6,<br>RP11-527N22.2 | chr8:37403374-37554183    | 0.86   | 9.07    | 3.39              | 0.00    | 0.00    |
| XLOC_005162 | AIM2                                          | chr1:159062483-159147096  | 0.13   | 1.36    | 3.39              | 0.00    | 0.00    |
| XLOC_010572 | RP11-832A4.7                                  | chr11:118264540-118268506 | 0.19   | 1.96    | 3.38              | 0.00    | 0.00    |
| XLOC_003777 | RP11-334L9.1                                  | chr1:38568805-38728578    | 0.25   | 2.62    | 3.38              | 0.00    | 0.00    |
| XLOC_063326 | BAALC-AS2                                     | chr8:103121031-103335268  | 0.12   | 1.20    | 3.37              | 0.00    | 0.00    |

Circular RNAs and interior circular RNAs under psoriatic skin, X. Liu *et al.*

| gene_id     | gene                               | locus                     | NN     | PP      | log2(fold_change) | p_value | q_value |
|-------------|------------------------------------|---------------------------|--------|---------|-------------------|---------|---------|
| XLOC_000733 | ZC3H12A                            | chr1:37453001-37484563    | 10.44  | 107.64  | 3.37              | 0.00    | 0.00    |
| XLOC_064710 | FOXE1                              | chr9:97853124-97860370    | 0.64   | 6.58    | 3.37              | 0.00    | 0.00    |
| XLOC_018782 | CTD-2547L24.4                      | chr14:91255833-91259003   | 0.14   | 1.45    | 3.36              | 0.00    | 0.00    |
| XLOC_032340 | CXCL17                             | chr19:42397127-42740569   | 0.08   | 0.78    | 3.34              | 0.00    | 0.00    |
| XLOC_062656 | LINC00589                          | chr8:29667485-29748109    | 0.07   | 0.71    | 3.34              | 0.00    | 0.00    |
| XLOC_046759 | CHRNA9                             | chr4:40334989-40355304    | 0.55   | 5.56    | 3.33              | 0.00    | 0.00    |
| XLOC_021415 | MESP2                              | chr15:89760590-89778754   | 0.16   | 1.57    | 3.31              | 0.00    | 0.00    |
| XLOC_001339 | GBP6                               | chr1:89363890-89427806    | 0.97   | 9.54    | 3.30              | 0.00    | 0.00    |
| XLOC_027793 | KRT17                              | chr17:41619436-41624842   | 201.69 | 1980.40 | 3.30              | 0.00    | 0.00    |
| XLOC_010570 | TMPRSS4                            | chr11:118015771-118121890 | 1.73   | 16.98   | 3.29              | 0.00    | 0.00    |
| XLOC_005111 | NES                                | chr1:156668762-156677397  | 1.02   | 9.98    | 3.29              | 0.00    | 0.00    |
| XLOC_055044 | ULBP2                              | chr6:149941988-149949235  | 0.14   | 1.40    | 3.28              | 0.00    | 0.00    |
| XLOC_043320 | GPR15                              | chr3:98497603-98593723    | 0.08   | 0.77    | 3.25              | 0.00    | 0.00    |
| XLOC_021204 | CPLX3,<br>LMAN1L                   | chr15:74812715-74831821   | 0.14   | 1.26    | 3.20              | 0.00    | 0.00    |
| XLOC_050969 | SPATA24                            | chr5:139390591-139404088  | 0.22   | 1.97    | 3.18              | 0.00    | 0.00    |
| XLOC_045427 | -                                  | chr3:124749563-124751229  | 0.26   | 2.30    | 3.16              | 0.00    | 0.00    |
| XLOC_053802 | TRIM15                             | chr6:30151882-30172696    | 0.33   | 2.93    | 3.16              | 0.00    | 0.00    |
| XLOC_038781 | MMP9                               | chr20:46008907-46089971   | 0.68   | 6.03    | 3.15              | 0.00    | 0.00    |
| XLOC_032318 | AC005626.3                         | chr19:41630960-41641861   | 0.24   | 2.09    | 3.15              | 0.00    | 0.00    |
| XLOC_022886 | IL32                               | chr16:3065296-3087100     | 2.07   | 18.09   | 3.13              | 0.00    | 0.00    |
| XLOC_067065 | -                                  | chrX:7040872-7446415      | 0.18   | 1.58    | 3.12              | 0.00    | 0.00    |
| XLOC_008261 | SLC16A9                            | chr10:59650760-59736002   | 0.17   | 1.45    | 3.12              | 0.00    | 0.00    |
| XLOC_004391 | GBP5                               | chr1:89256194-89273057    | 0.33   | 2.88    | 3.12              | 0.00    | 0.00    |
| XLOC_031833 | PGLYRP2                            | chr19:15468644-15498956   | 0.15   | 1.31    | 3.11              | 0.00    | 0.00    |
| XLOC_029516 | DSC2                               | chr18:31058839-31163061   | 10.20  | 87.61   | 3.10              | 0.00    | 0.00    |
| XLOC_019264 | -                                  | chr14:24243401-24244191   | 0.12   | 1.05    | 3.09              | 0.00    | 0.00    |
| XLOC_018818 | SERPINA3,<br>SERPINA4,<br>SERPINA5 | chr14:94561090-94624646   | 3.46   | 29.22   | 3.08              | 0.00    | 0.00    |
| XLOC_061996 | FAM83A                             | chr8:123178863-123210471  | 2.04   | 17.12   | 3.07              | 0.00    | 0.00    |
| XLOC_044181 | RTP4                               | chr3:187368331-187372423  | 0.39   | 3.22    | 3.06              | 0.00    | 0.00    |
| XLOC_044997 | FAM3D                              | chr3:58564085-58666848    | 0.70   | 5.87    | 3.06              | 0.00    | 0.00    |
| XLOC_005003 | S100A2,<br>S100A3                  | chr1:153543612-153567890  | 103.96 | 861.89  | 3.05              | 0.00    | 0.00    |
| XLOC_005368 | -                                  | chr1:172531729-172532344  | 0.22   | 1.80    | 3.03              | 0.00    | 0.00    |
| XLOC_019972 | SERPINA1                           | chr14:94376746-94390693   | 0.71   | 5.80    | 3.03              | 0.00    | 0.00    |
| XLOC_037052 | CXCR4                              | chr2:136114348-136118165  | 0.98   | 7.98    | 3.03              | 0.00    | 0.00    |
| XLOC_035630 | CMPK2                              | chr2:6840569-6898239      | 0.89   | 7.24    | 3.02              | 0.00    | 0.00    |
| XLOC_005687 | SLC26A9                            | chr1:205912922-205943460  | 1.04   | 8.46    | 3.02              | 0.00    | 0.00    |
| XLOC_040892 | AP001610.5                         | chr21:41420303-41459214   | 0.10   | 0.81    | 3.02              | 0.00    | 0.00    |

Circular RNAs and interior circular RNAs under psoriatic skin, X. Liu *et al.*

| gene_id     | gene                        | locus                     | NN     | PP      | log2(fold_change) | p_value | q_value |
|-------------|-----------------------------|---------------------------|--------|---------|-------------------|---------|---------|
| XLOC_047173 | HERC6                       | chr4:88378738-88443111    | 2.28   | 18.47   | 3.02              | 0.00    | 0.00    |
| XLOC_054041 | MDFI                        | chr6:41636881-41654501    | 3.30   | 26.37   | 3.00              | 0.00    | 0.00    |
| XLOC_012575 | LINC01395,<br>RP11-507F16.1 | chr11:129591492-129815147 | 0.27   | 2.19    | 3.00              | 0.00    | 0.00    |
| XLOC_036904 | -                           | chr2:120227406-120232462  | 0.11   | 0.84    | 2.99              | 0.00    | 0.00    |
| XLOC_047365 | RP11-384K6.6                | chr4:118591752-118633893  | 0.96   | 7.60    | 2.98              | 0.00    | 0.00    |
| XLOC_059973 | AC073850.6                  | chr7:80312573-80682610    | 0.40   | 3.09    | 2.96              | 0.00    | 0.00    |
| XLOC_048700 | CXCL2                       | chr4:74097034-74099293    | 0.19   | 1.49    | 2.95              | 0.00    | 0.00    |
| XLOC_027381 | LGALS9B                     | chr17:20449394-20699914   | 0.40   | 3.07    | 2.94              | 0.00    | 0.00    |
| XLOC_009395 | LUZP2                       | chr11:24496710-25082879   | 0.23   | 1.72    | 2.92              | 0.00    | 0.00    |
| XLOC_057471 | AC011288.2                  | chr7:13101390-13704149    | 0.33   | 2.47    | 2.92              | 0.00    | 0.00    |
| XLOC_038976 | CDH26                       | chr20:59958331-60034460   | 0.24   | 1.80    | 2.91              | 0.00    | 0.00    |
| XLOC_019011 | CTD-2555C10.3               | chr14:102545253-102558930 | 0.22   | 1.65    | 2.91              | 0.00    | 0.00    |
| XLOC_008067 | NAMPTP1                     | chr10:36521720-36524234   | 0.72   | 5.36    | 2.89              | 0.00    | 0.00    |
| XLOC_027143 | RP11-609D21.3               | chr17:6755432-6776116     | 2.19   | 16.25   | 2.89              | 0.00    | 0.00    |
| XLOC_005114 | CRABP2                      | chr1:156699605-156705816  | 61.56  | 448.20  | 2.86              | 0.00    | 0.00    |
| XLOC_019940 | GPR68                       | chr14:90845874-91253925   | 3.25   | 23.51   | 2.86              | 0.00    | 0.00    |
| XLOC_044990 | DNASE1L3                    | chr3:58192107-58214697    | 1.74   | 12.60   | 2.86              | 0.00    | 0.00    |
| XLOC_056566 | CD24                        | chr6:106969830-106975627  | 57.77  | 414.99  | 2.84              | 0.00    | 0.00    |
| XLOC_002247 | FMO2                        | chr1:171167182-171286274  | 0.76   | 5.46    | 2.84              | 0.00    | 0.00    |
| XLOC_050336 | TMEM171                     | chr5:73120291-73131817    | 0.52   | 3.72    | 2.83              | 0.00    | 0.00    |
| XLOC_036833 | IL1B                        | chr2:112829750-112864043  | 0.61   | 4.30    | 2.82              | 0.00    | 0.00    |
| XLOC_031683 | ZNF812                      | chr19:9689923-9700817     | 0.10   | 0.71    | 2.82              | 0.00    | 0.00    |
| XLOC_001091 | PCSK9                       | chr1:55039447-55064906    | 0.98   | 6.91    | 2.82              | 0.00    | 0.00    |
| XLOC_056032 | TNFRSF21                    | chr6:47231378-47309974    | 1.96   | 13.80   | 2.82              | 0.00    | 0.00    |
| XLOC_006010 | RP11-295G20.2               | chr1:231519950-231528643  | 14.83  | 103.40  | 2.80              | 0.00    | 0.00    |
| XLOC_024293 | CARHSP1                     | chr16:8674564-8869028     | 13.25  | 92.24   | 2.80              | 0.00    | 0.00    |
| XLOC_044964 | WNT5A                       | chr3:55465714-55490539    | 2.04   | 14.07   | 2.79              | 0.00    | 0.00    |
| XLOC_060058 | SAMD9                       | chr7:93098363-93118023    | 2.11   | 14.55   | 2.79              | 0.00    | 0.00    |
| XLOC_014068 | OAS1                        | chr12:112906776-113017751 | 5.58   | 38.01   | 2.77              | 0.00    | 0.00    |
| XLOC_060015 | STEAP4                      | chr7:87934127-88306993    | 5.08   | 34.18   | 2.75              | 0.00    | 0.00    |
| XLOC_017209 | EPSTI1                      | chr13:42886202-42992271   | 1.13   | 7.60    | 2.75              | 0.00    | 0.00    |
| XLOC_059320 | STEAP1B                     | chr7:22418996-22665533    | 0.22   | 1.45    | 2.75              | 0.00    | 0.00    |
| XLOC_032337 | CNFN                        | chr19:42387018-42390287   | 248.25 | 1650.74 | 2.73              | 0.00    | 0.00    |
| XLOC_030144 | ANGPTL4                     | chr19:7958578-8489114     | 5.44   | 36.08   | 2.73              | 0.00    | 0.00    |
| XLOC_030107 | TNFSF9                      | chr19:6530998-6536793     | 0.41   | 2.73    | 2.72              | 0.00    | 0.00    |
| XLOC_063464 | FAM83A-AS1                  | chr8:123178863-123210471  | 0.13   | 0.86    | 2.71              | 0.00    | 0.00    |
| XLOC_060269 | NAMPT                       | chr7:106248119-106286326  | 30.99  | 200.22  | 2.69              | 0.00    | 0.00    |
| XLOC_007382 | INA                         | chr10:103277146-103290351 | 0.72   | 4.63    | 2.69              | 0.00    | 0.00    |

Circular RNAs and interior circular RNAs under psoriatic skin, X. Liu *et al.*

| gene_id     | gene                        | locus                     | NN    | PP     | log2(fold_change) | p_value | q_value |
|-------------|-----------------------------|---------------------------|-------|--------|-------------------|---------|---------|
| XLOC_007199 | IFIT3                       | chr10:89213464-89414557   | 2.82  | 18.08  | 2.68              | 0.00    | 0.00    |
| XLOC_052794 | PROB1                       | chr5:139390591-139404088  | 0.49  | 3.10   | 2.68              | 0.00    | 0.00    |
| XLOC_045299 | ZBED2                       | chr3:111292718-111665750  | 0.61  | 3.85   | 2.66              | 0.00    | 0.00    |
| XLOC_011147 | SAA2,<br>SAA2-SAA4,<br>SAA4 | chr11:18231348-18248643   | 0.34  | 2.13   | 2.65              | 0.00    | 0.00    |
| XLOC_052835 | FCHSD1                      | chr5:141636949-141651621  | 14.25 | 88.67  | 2.64              | 0.00    | 0.00    |
| XLOC_028973 | LIPG                        | chr18:49560698-49599685   | 1.53  | 9.52   | 2.63              | 0.00    | 0.00    |
| XLOC_048819 | HPSE                        | chr4:83292460-83335153    | 6.65  | 41.13  | 2.63              | 0.00    | 0.00    |
| XLOC_055950 | TREM2                       | chr6:41158505-41163186    | 0.13  | 0.83   | 2.62              | 0.00    | 0.00    |
| XLOC_041546 | APOL6                       | chr22:35648374-35668462   | 2.43  | 14.85  | 2.61              | 0.00    | 0.00    |
| XLOC_032931 | AC092580.4                  | chr2:7725568-7732348      | 0.37  | 2.26   | 2.61              | 0.00    | 0.01    |
| XLOC_069890 | HAUS7,<br>TREX2             | chrX:153432711-153509554  | 16.45 | 100.50 | 2.61              | 0.00    | 0.00    |
| XLOC_003148 | RP11-34P13.16               | chr1:89217-181062         | 0.34  | 2.05   | 2.60              | 0.00    | 0.00    |
| XLOC_022705 | RP11-66B24.4                | chr15:100849560-101086066 | 1.25  | 7.60   | 2.60              | 0.00    | 0.00    |
| XLOC_011721 | FOSL1                       | chr11:65891762-65900573   | 0.56  | 3.36   | 2.59              | 0.00    | 0.00    |
| XLOC_051216 | FABP6                       | chr5:160187366-160238735  | 0.17  | 1.01   | 2.57              | 0.00    | 0.00    |
| XLOC_025547 | XAF1                        | chr17:6755432-6776116     | 2.48  | 14.76  | 2.57              | 0.00    | 0.00    |
| XLOC_059133 | RP11-482G13.1               | chr7:12703-36681          | 0.47  | 2.79   | 2.56              | 0.00    | 0.00    |
| XLOC_058238 | CD36                        | chr7:80312573-80682610    | 16.51 | 96.73  | 2.55              | 0.00    | 0.00    |
| XLOC_028433 | SOCS3                       | chr17:78355177-78360077   | 3.39  | 19.87  | 2.55              | 0.00    | 0.00    |
| XLOC_024072 | FAM157C                     | chr16:90102220-90222678   | 0.17  | 0.97   | 2.55              | 0.00    | 0.00    |
| XLOC_046204 | -                           | chr3:193824058-193837852  | 0.74  | 4.27   | 2.53              | 0.00    | 0.00    |
| XLOC_035924 | XDH                         | chr2:31334009-31429404    | 0.76  | 4.37   | 2.52              | 0.00    | 0.00    |
| XLOC_041824 | SYCE3                       | chr22:50551111-50565795   | 0.16  | 0.91   | 2.50              | 0.00    | 0.00    |
| XLOC_030874 | LIPE-AS1                    | chr19:42397127-42740569   | 6.32  | 35.74  | 2.50              | 0.00    | 0.00    |
| XLOC_007202 | IFIT1                       | chr10:89213464-89414557   | 3.17  | 17.92  | 2.50              | 0.00    | 0.00    |
| XLOC_013489 | IL23A                       | chr12:56334173-56340410   | 0.17  | 0.95   | 2.50              | 0.00    | 0.00    |
| XLOC_055287 | SERPINB1                    | chr6:2832331-2842006      | 8.74  | 49.24  | 2.49              | 0.00    | 0.00    |
| XLOC_045413 | PARP9                       | chr3:122527772-122575203  | 5.10  | 28.21  | 2.47              | 0.00    | 0.00    |
| XLOC_002453 | RGS1                        | chr1:192491723-192766340  | 0.67  | 3.73   | 2.47              | 0.00    | 0.00    |
| XLOC_019155 | RP11-203M5.8                | chr14:20468953-20482076   | 1.76  | 9.71   | 2.46              | 0.00    | 0.00    |
| XLOC_024802 | NETO2                       | chr16:47077692-47144014   | 0.75  | 4.08   | 2.45              | 0.00    | 0.00    |
| XLOC_049607 | -                           | chr4:183794945-184023924  | 0.48  | 2.64   | 2.44              | 0.00    | 0.00    |
| XLOC_022462 | BCL2A1                      | chr15:79960888-79971446   | 0.59  | 3.21   | 2.44              | 0.00    | 0.00    |
| XLOC_031846 | UCA1                        | chr19:15827044-15838385   | 0.20  | 1.06   | 2.44              | 0.00    | 0.01    |
| XLOC_002224 | ATP1B1                      | chr1:169105696-169367967  | 22.91 | 123.66 | 2.43              | 0.00    | 0.00    |
| XLOC_044392 | FAM157A                     | chr3:198153286-198222513  | 0.22  | 1.21   | 2.43              | 0.00    | 0.00    |
| XLOC_034535 | DHRS9                       | chr2:168918130-169101210  | 1.98  | 10.58  | 2.42              | 0.00    | 0.00    |

Circular RNAs and interior circular RNAs under psoriatic skin, X. Liu *et al.*

| gene_id     | gene          | locus                     | NN    | PP     | log2(fold_change) | p_value | q_value |
|-------------|---------------|---------------------------|-------|--------|-------------------|---------|---------|
| XLOC_029099 | SERPINB13     | chr18:63586988-63604639   | 18.07 | 96.64  | 2.42              | 0.00    | 0.00    |
| XLOC_065957 | TRPM6         | chr9:74722404-74888094    | 0.15  | 0.81   | 2.42              | 0.00    | 0.00    |
| XLOC_026413 | B4GALNT2      | chr17:49095388-49177580   | 0.37  | 1.97   | 2.42              | 0.00    | 0.00    |
| XLOC_038243 | TGM3          | chr20:2295952-2346939     | 45.73 | 243.53 | 2.41              | 0.00    | 0.00    |
| XLOC_012594 | -             | chr11:129591492-129815147 | 0.14  | 0.73   | 2.41              | 0.00    | 0.00    |
| XLOC_017820 | PNP           | chr14:20468953-20482076   | 10.68 | 55.43  | 2.38              | 0.00    | 0.00    |
| XLOC_031032 | FUT2          | chr19:48695805-48708218   | 4.86  | 25.25  | 2.38              | 0.00    | 0.00    |
| XLOC_032237 | -             | chr19:38990713-39117070   | 0.21  | 1.08   | 2.36              | 0.00    | 0.00    |
| XLOC_061450 | LYN           | chr8:55879812-56014421    | 2.33  | 11.84  | 2.35              | 0.00    | 0.00    |
| XLOC_027676 | C17orf96      | chr17:38671702-38729803   | 1.64  | 8.35   | 2.34              | 0.00    | 0.00    |
| XLOC_025596 | AC129492.6    | chr17:8063935-8088016     | 1.55  | 7.85   | 2.34              | 0.00    | 0.00    |
| XLOC_009909 | RP11-783K16.5 | chr11:64244463-64249494   | 6.10  | 30.96  | 2.34              | 0.00    | 0.00    |
| XLOC_013631 | LYZ           | chr12:69348340-69354234   | 10.44 | 52.96  | 2.34              | 0.00    | 0.00    |
| XLOC_050083 | CARD6         | chr5:40841183-40860175    | 1.08  | 5.49   | 2.34              | 0.00    | 0.00    |
| XLOC_010750 | TMEM45B       | chr11:129815818-129895620 | 16.80 | 84.43  | 2.33              | 0.00    | 0.00    |
| XLOC_005308 | NME7          | chr1:169105696-169367967  | 14.24 | 71.32  | 2.32              | 0.00    | 0.00    |
| XLOC_019265 | TGM1          | chr14:24244271-24264432   | 39.41 | 197.10 | 2.32              | 0.00    | 0.00    |
| XLOC_012408 | MPZL2         | chr11:118253402-118264536 | 27.87 | 138.14 | 2.31              | 0.00    | 0.00    |
| XLOC_067066 | -             | chrX:7040872-7446415      | 0.19  | 0.92   | 2.31              | 0.00    | 0.00    |
| XLOC_028693 | RAB31         | chr18:9708164-9862717     | 7.27  | 35.95  | 2.30              | 0.00    | 0.00    |
| XLOC_009477 | EHF           | chr11:34620760-34666569   | 28.34 | 140.04 | 2.30              | 0.00    | 0.00    |
| XLOC_023191 | IL4R          | chr16:27313386-27364778   | 7.77  | 38.19  | 2.30              | 0.00    | 0.00    |
| XLOC_015023 | GALNT6        | chr12:51351246-51515763   | 5.14  | 25.22  | 2.30              | 0.00    | 0.00    |
| XLOC_007392 | SH3PXD2A-AS1  | chr10:103593042-104029233 | 3.03  | 14.86  | 2.30              | 0.00    | 0.00    |
| XLOC_056973 | RAET1G        | chr6:149724314-149923121  | 1.16  | 5.70   | 2.29              | 0.00    | 0.00    |
| XLOC_040275 | DSCR8,KCNJ15  | chr21:38121450-38307448   | 1.74  | 8.48   | 2.28              | 0.00    | 0.00    |
| XLOC_054667 | FAM26F        | chr6:116460738-116464944  | 0.69  | 3.34   | 2.28              | 0.00    | 0.00    |
| XLOC_023249 | RP11-455F5.6  | chr16:30104395-30123506   | 0.16  | 0.75   | 2.27              | 0.00    | 0.00    |
| XLOC_005213 | SLAMF1        | chr1:160608099-160647295  | 0.17  | 0.81   | 2.26              | 0.00    | 0.00    |
| XLOC_064581 | CTSL          | chr9:87725518-87731393    | 8.60  | 41.25  | 2.26              | 0.00    | 0.00    |
| XLOC_055958 | TREM1         | chr6:41267925-41286719    | 0.16  | 0.75   | 2.26              | 0.00    | 0.00    |
| XLOC_038559 | ID1           | chr20:31605282-31606515   | 44.41 | 211.37 | 2.25              | 0.00    | 0.00    |
| XLOC_033165 | EFR3B         | chr2:25042129-25159423    | 0.43  | 2.03   | 2.25              | 0.00    | 0.00    |
| XLOC_035280 | CXCR2         | chr2:218125288-218137259  | 2.46  | 11.68  | 2.25              | 0.00    | 0.00    |
| XLOC_015329 | RP11-1143G9.4 | chr12:69348340-69354234   | 9.63  | 45.76  | 2.25              | 0.00    | 0.00    |
| XLOC_051785 | -             | chr5:34396437-34396748    | 0.66  | 3.14   | 2.24              | 0.00    | 0.01    |
| XLOC_038504 | CST7          | chr20:24949201-24992979   | 1.00  | 4.74   | 2.24              | 0.00    | 0.00    |
| XLOC_004388 | GBP1          | chr1:89051513-89065363    | 5.22  | 24.54  | 2.23              | 0.00    | 0.00    |

Circular RNAs and interior circular RNAs under psoriatic skin, X. Liu *et al.*

| gene_id     | gene                        | locus                     | NN     | PP      | log2(fold_change) | p_value | q_value |
|-------------|-----------------------------|---------------------------|--------|---------|-------------------|---------|---------|
| XLOC_053205 | GPRIN1                      | chr5:176526342-176610133  | 0.96   | 4.52    | 2.23              | 0.00    | 0.00    |
| XLOC_034143 | IL36RN                      | chr2:113058637-113065382  | 40.92  | 191.99  | 2.23              | 0.00    | 0.00    |
| XLOC_009484 | RP11-350D17.3               | chr11:34709269-34715086   | 0.16   | 0.75    | 2.23              | 0.00    | 0.01    |
| XLOC_002081 | SLAMF7                      | chr1:160739056-160755112  | 0.71   | 3.30    | 2.21              | 0.00    | 0.00    |
| XLOC_011332 | CHST1                       | chr11:45648876-45665622   | 0.21   | 0.96    | 2.21              | 0.00    | 0.00    |
| XLOC_010820 | IRF7                        | chr11:575704-616003       | 8.56   | 39.52   | 2.21              | 0.00    | 0.00    |
| XLOC_031564 | CTB-50L17.14,<br>LRG1,PLIN5 | chr19:4522440-4540474     | 7.53   | 34.70   | 2.21              | 0.00    | 0.00    |
| XLOC_054382 | TPBG                        | chr6:82363205-82401505    | 6.74   | 31.07   | 2.20              | 0.00    | 0.00    |
| XLOC_032582 | KLK10                       | chr19:50941230-51020175   | 31.37  | 143.71  | 2.20              | 0.00    | 0.00    |
| XLOC_027730 | CCR7                        | chr17:40552261-40565472   | 0.40   | 1.82    | 2.19              | 0.00    | 0.00    |
| XLOC_028443 | LGALS3BP                    | chr17:78971186-78980109   | 16.33  | 74.45   | 2.19              | 0.00    | 0.00    |
| XLOC_061322 | IDO1                        | chr8:39902274-40016391    | 0.29   | 1.30    | 2.19              | 0.00    | 0.00    |
| XLOC_005121 | SH2D2A                      | chr1:156806242-156881850  | 0.20   | 0.89    | 2.19              | 0.00    | 0.00    |
| XLOC_014069 | OAS3                        | chr12:112906776-113017751 | 5.48   | 24.92   | 2.19              | 0.00    | 0.00    |
| XLOC_009185 | OR56B1,<br>TRIM22           | chr11:5663234-5938619     | 5.91   | 26.84   | 2.18              | 0.00    | 0.00    |
| XLOC_001895 | LINC01527                   | chr1:152897815-152955627  | 0.79   | 3.57    | 2.18              | 0.00    | 0.00    |
| XLOC_002102 | PCP4L1                      | chr1:161258726-161289057  | 3.15   | 14.25   | 2.18              | 0.00    | 0.00    |
| XLOC_019652 | RP11-1112J20.2              | chr14:63122614-63183526   | 0.36   | 1.62    | 2.18              | 0.00    | 0.00    |
| XLOC_038841 | LINC01272                   | chr20:50267485-50279795   | 0.21   | 0.96    | 2.18              | 0.00    | 0.00    |
| XLOC_007760 | RP11-116G8.5                | chr10:5514243-5531184     | 271.60 | 1225.76 | 2.17              | 0.00    | 0.00    |
| XLOC_001618 | CD2                         | chr1:116754384-116769230  | 0.57   | 2.58    | 2.17              | 0.00    | 0.00    |
| XLOC_028857 | DSG3                        | chr18:31447556-31486660   | 36.66  | 165.01  | 2.17              | 0.00    | 0.00    |
| XLOC_029463 | ANKRD29                     | chr18:23598925-23663203   | 0.83   | 3.71    | 2.17              | 0.00    | 0.00    |
| XLOC_051143 | GPX3                        | chr5:151020437-151028993  | 0.26   | 1.16    | 2.16              | 0.00    | 0.01    |
| XLOC_019059 | ASPG,KIF26A                 | chr14:104085678-104181093 | 9.56   | 42.71   | 2.16              | 0.00    | 0.00    |
| XLOC_042586 | IRAK2                       | chr3:10164718-10243888    | 1.52   | 6.75    | 2.15              | 0.00    | 0.00    |
| XLOC_006308 | CALML3                      | chr10:5514243-5531184     | 54.53  | 241.74  | 2.15              | 0.00    | 0.00    |
| XLOC_014615 | PLBD1                       | chr12:14503595-14757963   | 21.89  | 97.01   | 2.15              | 0.00    | 0.00    |
| XLOC_056048 | CRISP3                      | chr6:49727380-49744437    | 0.49   | 2.18    | 2.15              | 0.00    | 0.00    |
| XLOC_023716 | HAS3                        | chr16:69105563-69408571   | 2.90   | 12.86   | 2.15              | 0.00    | 0.00    |
| XLOC_041082 | USP18                       | chr22:18149723-18177397   | 0.98   | 4.32    | 2.15              | 0.00    | 0.00    |
| XLOC_031851 | CYP4F11                     | chr19:15907826-15934881   | 0.38   | 1.68    | 2.14              | 0.00    | 0.00    |
| XLOC_065200 | PAEP                        | chr9:135561755-135566955  | 0.19   | 0.85    | 2.14              | 0.00    | 0.00    |
| XLOC_036556 | IGKV3-20                    | chr2:89142573-89143160    | 0.61   | 2.66    | 2.13              | 0.00    | 0.01    |
| XLOC_025595 | RP11-599B13.9               | chr17:8063935-8088016     | 0.29   | 1.26    | 2.13              | 0.00    | 0.00    |
| XLOC_055290 | SERPINB9                    | chr6:2887265-2903325      | 1.01   | 4.41    | 2.13              | 0.00    | 0.00    |
| XLOC_025665 | RP11-214O1.2                | chr17:14301082-14349404   | 0.34   | 1.50    | 2.13              | 0.00    | 0.01    |



Circular RNAs and interior circular RNAs under psoriatic skin, X. Liu *et al.*

| gene_id     | gene                                          | locus                     | NN    | PP     | log2(fold_change) | p_value | q_value |
|-------------|-----------------------------------------------|---------------------------|-------|--------|-------------------|---------|---------|
| XLOC_000690 | TRIM62                                        | chr1:33124076-33301015    | 0.19  | 0.83   | 2.13              | 0.00    | 0.00    |
| XLOC_050266 | CCNB1                                         | chr5:69167009-69178245    | 5.47  | 23.88  | 2.13              | 0.00    | 0.00    |
| XLOC_058869 | TRBV20-1                                      | chr7:142626648-142627399  | 0.38  | 1.66   | 2.12              | 0.00    | 0.01    |
| XLOC_030599 | CCNE1                                         | chr19:29811779-29824405   | 1.64  | 7.15   | 2.12              | 0.00    | 0.00    |
| XLOC_012099 | CTSC                                          | chr11:88293553-88337791   | 21.04 | 91.47  | 2.12              | 0.00    | 0.00    |
| XLOC_000045 | SCNN1D                                        | chr1:1274716-1292188      | 1.24  | 5.33   | 2.11              | 0.00    | 0.00    |
| XLOC_015214 | AGAP2                                         | chr12:57723760-57761067   | 0.88  | 3.80   | 2.11              | 0.00    | 0.00    |
| XLOC_022442 | CHRNA3                                        | chr15:78565490-78621295   | 0.31  | 1.35   | 2.10              | 0.00    | 0.00    |
| XLOC_003961 | PDZK1IP1                                      | chr1:47183435-47191044    | 52.78 | 226.21 | 2.10              | 0.00    | 0.00    |
| XLOC_008815 | AFAP1L2                                       | chr10:114239222-114405186 | 4.92  | 21.05  | 2.10              | 0.00    | 0.00    |
| XLOC_027794 | KRT42P                                        | chr17:41626326-41640199   | 0.61  | 2.60   | 2.10              | 0.00    | 0.00    |
| XLOC_008334 | LRRC20                                        | chr10:70298682-70382688   | 1.42  | 6.04   | 2.09              | 0.00    | 0.00    |
| XLOC_064114 | -                                             | chr9:38078383-38094674    | 0.27  | 1.14   | 2.08              | 0.00    | 0.00    |
| XLOC_024743 | BCAP31P1,<br>RP11-812E19.14,<br>RP11-812E19.3 | chr16:33965578-33991740   | 0.51  | 2.17   | 2.08              | 0.00    | 0.00    |
| XLOC_001894 | IVL                                           | chr1:152897815-152955627  | 43.72 | 184.41 | 2.08              | 0.00    | 0.00    |
| XLOC_004390 | GBP4                                          | chr1:89181147-89198945    | 1.04  | 4.39   | 2.07              | 0.00    | 0.00    |
| XLOC_047041 | AREG                                          | chr4:74445133-74455653    | 1.21  | 5.09   | 2.07              | 0.00    | 0.00    |
| XLOC_032964 | RRM2                                          | chr2:10120733-10131419    | 5.52  | 23.15  | 2.07              | 0.00    | 0.00    |
| XLOC_011266 | ELF5                                          | chr11:34478670-34525096   | 0.79  | 3.32   | 2.07              | 0.00    | 0.00    |
| XLOC_004029 | LRP8                                          | chr1:53226891-53328070    | 1.32  | 5.51   | 2.06              | 0.00    | 0.00    |
| XLOC_020730 | CTD-2382E5.2                                  | chr15:41972762-42051190   | 0.67  | 2.79   | 2.06              | 0.00    | 0.00    |
| XLOC_041610 | APOBEC3A,<br>APOBEC3B                         | chr22:38952740-38998209   | 1.06  | 4.41   | 2.06              | 0.00    | 0.00    |
| XLOC_003601 | CD164L2                                       | chr1:27379173-27383380    | 1.94  | 8.01   | 2.05              | 0.00    | 0.00    |
| XLOC_040840 | AP000692.10                                   | chr21:36319791-36419015   | 0.32  | 1.32   | 2.05              | 0.00    | 0.01    |
| XLOC_035133 | CTLA4                                         | chr2:203853905-203874119  | 0.20  | 0.81   | 2.04              | 0.00    | 0.00    |
| XLOC_057174 | SOD2                                          | chr6:159669056-159789749  | 52.37 | 215.46 | 2.04              | 0.00    | 0.00    |
| XLOC_021396 | ISG20                                         | chr15:88636152-88656483   | 2.31  | 9.50   | 2.04              | 0.00    | 0.00    |
| XLOC_023342 | BCAP31P2,<br>RP11-989E6.3                     | chr16:32869793-32890918   | 0.19  | 0.78   | 2.04              | 0.00    | 0.00    |
| XLOC_010806 | IFITM3                                        | chr11:318639-330122       | 65.67 | 269.13 | 2.04              | 0.00    | 0.00    |
| XLOC_016923 | GJA3                                          | chr13:20138254-20161478   | 0.21  | 0.85   | 2.03              | 0.00    | 0.00    |
| XLOC_064036 | PRSS3                                         | chr9:33750465-34049181    | 24.54 | 100.04 | 2.03              | 0.00    | 0.00    |
| XLOC_039765 | FAM65C                                        | chr20:50510320-50691538   | 1.26  | 5.14   | 2.03              | 0.00    | 0.00    |
| XLOC_003997 | TTC39A                                        | chr1:51285852-51350193    | 6.90  | 28.06  | 2.02              | 0.00    | 0.00    |
| XLOC_055574 | HIST1H1A                                      | chr6:26017084-26017732    | 5.85  | 23.80  | 2.02              | 0.00    | 0.00    |
| XLOC_001009 | TTC39A-AS1                                    | chr1:51285852-51350193    | 0.25  | 1.00   | 2.02              | 0.00    | 0.00    |
| XLOC_026028 | CCL2                                          | chr17:34255217-34257203   | 6.02  | 24.34  | 2.01              | 0.00    | 0.00    |
| XLOC_021933 | PLA2G4E                                       | chr15:41972762-42051190   | 21.03 | 84.75  | 2.01              | 0.00    | 0.00    |

Circular RNAs and interior circular RNAs under psoriatic skin, X. Liu *et al.*

| gene_id     | gene         | locus                     | NN     | PP     | log2(fold_change) | p_value | q_value |
|-------------|--------------|---------------------------|--------|--------|-------------------|---------|---------|
| XLOC_017623 | RP11-12G12.7 | chr13:100083705-100589528 | 1.21   | 4.89   | 2.01              | 0.00    | 0.00    |
| XLOC_042233 | APOL2        | chr22:36225910-36239954   | 4.04   | 16.22  | 2.01              | 0.00    | 0.00    |
| XLOC_052648 | FBN2         | chr5:128257908-129033882  | 0.31   | 1.24   | 2.00              | 0.00    | 0.00    |
| XLOC_047389 | PDE5A        | chr4:119454700-119628991  | 0.75   | 0.19   | -2.00             | 0.00    | 0.01    |
| XLOC_025701 | LRRRC75A     | chr17:16438821-16492153   | 1.88   | 0.47   | -2.01             | 0.00    | 0.00    |
| XLOC_014644 | NDFIP1P1     | chr12:18080648-18773385   | 0.81   | 0.20   | -2.01             | 0.00    | 0.00    |
| XLOC_004948 | FLG2         | chr1:152122533-152445456  | 756.93 | 188.44 | -2.01             | 0.00    | 0.01    |
| XLOC_043418 | SLC9C1       | chr3:112086334-112294258  | 2.89   | 0.72   | -2.01             | 0.00    | 0.00    |
| XLOC_065683 | CNTNAP3      | chr9:39072048-39288443    | 15.81  | 3.92   | -2.01             | 0.00    | 0.00    |
| XLOC_051341 | FAM153B      | chr5:176049677-176132258  | 5.85   | 1.45   | -2.01             | 0.00    | 0.00    |
| XLOC_032430 | AC007193.6   | chr19:46078815-46250270   | 2.01   | 0.50   | -2.02             | 0.00    | 0.00    |
| XLOC_023746 | IL34         | chr16:70579521-70686066   | 51.50  | 12.69  | -2.02             | 0.00    | 0.00    |
| XLOC_031328 | ZNF471       | chr19:56507842-56530532   | 1.42   | 0.35   | -2.03             | 0.00    | 0.00    |
| XLOC_020749 | MAP1A        | chr15:43510957-43532330   | 2.61   | 0.64   | -2.03             | 0.00    | 0.00    |
| XLOC_001901 | RP1-140J1.1  | chr1:153174517-153215617  | 1.10   | 0.27   | -2.03             | 0.00    | 0.00    |
| XLOC_069579 | TMEM255A     | chrX:120258649-120315775  | 2.20   | 0.54   | -2.03             | 0.00    | 0.00    |
| XLOC_029332 | LINC01254    | chr18:10405132-10425411   | 0.73   | 0.18   | -2.03             | 0.00    | 0.00    |
| XLOC_048746 | SOWAHB       | chr4:76893789-76898211    | 2.04   | 0.50   | -2.03             | 0.00    | 0.00    |
| XLOC_058456 | LRRRC17      | chr7:102748970-103149560  | 1.26   | 0.31   | -2.03             | 0.00    | 0.00    |
| XLOC_017675 | -            | chr13:105570154-105599548 | 2.77   | 0.68   | -2.03             | 0.00    | 0.00    |
| XLOC_004099 | CYP2J2       | chr1:59893307-59926790    | 10.28  | 2.51   | -2.03             | 0.00    | 0.00    |
| XLOC_046967 | TMPRSS11E    | chr4:68447413-68501058    | 3.24   | 0.79   | -2.04             | 0.00    | 0.00    |
| XLOC_023880 | GAN          | chr16:81314934-81396605   | 116.59 | 28.35  | -2.04             | 0.00    | 0.00    |
| XLOC_046241 | APOD         | chr3:195568701-195584205  | 33.27  | 8.06   | -2.05             | 0.00    | 0.00    |
| XLOC_014670 | SOX5         | chr12:23528854-23951197   | 7.94   | 1.92   | -2.05             | 0.00    | 0.00    |
| XLOC_062488 | RPS3AP34     | chr8:12448012-12708364    | 1.92   | 0.47   | -2.05             | 0.00    | 0.00    |
| XLOC_068494 | BGN          | chrX:153432711-153509554  | 23.58  | 5.68   | -2.05             | 0.00    | 0.00    |
| XLOC_054669 | FAM26E       | chr6:116492296-116558868  | 1.17   | 0.28   | -2.06             | 0.00    | 0.00    |
| XLOC_009612 | FAM180B      | chr11:47586692-47589194   | 3.78   | 0.90   | -2.06             | 0.00    | 0.00    |
| XLOC_012221 | MMP7         | chr11:102520507-102530753 | 5.53   | 1.32   | -2.07             | 0.00    | 0.00    |
| XLOC_064163 | RP11-290L7.5 | chr9:39072048-39288443    | 1.25   | 0.30   | -2.07             | 0.00    | 0.00    |
| XLOC_007506 | SLC18A2      | chr10:117239599-117375467 | 1.45   | 0.34   | -2.07             | 0.00    | 0.00    |
| XLOC_026512 | ANKFN1       | chr17:56110957-56516998   | 2.18   | 0.52   | -2.07             | 0.00    | 0.00    |
| XLOC_022281 | ITGA11       | chr15:68267791-68432314   | 2.85   | 0.68   | -2.07             | 0.00    | 0.00    |
| XLOC_045035 | MAGI1-AS1    | chr3:65353016-66038834    | 1.14   | 0.27   | -2.07             | 0.00    | 0.00    |
| XLOC_018441 | PELI2        | chr14:56117315-56310761   | 6.51   | 1.55   | -2.08             | 0.00    | 0.00    |
| XLOC_032431 | AC007193.6   | chr19:46078815-46250270   | 2.41   | 0.57   | -2.08             | 0.00    | 0.01    |
| XLOC_009058 | CRACR2B      | chr11:818901-842545       | 2.90   | 0.69   | -2.08             | 0.00    | 0.00    |

| gene_id     | gene                          | locus                     | NN     | PP    | log2(fold_change) | p_value | q_value |
|-------------|-------------------------------|---------------------------|--------|-------|-------------------|---------|---------|
| XLOC_021257 | RP11-307C19.2                 | chr15:77568969-77608888   | 1.85   | 0.44  | -2.08             | 0.00    | 0.00    |
| XLOC_056429 | TBX18                         | chr6:84687350-84764592    | 2.96   | 0.70  | -2.08             | 0.00    | 0.00    |
| XLOC_004713 | HMGCS2                        | chr1:119747900-119769001  | 2.66   | 0.63  | -2.09             | 0.00    | 0.00    |
| XLOC_064270 | -                             | chr9:61330412-61380478    | 1.66   | 0.39  | -2.09             | 0.00    | 0.00    |
| XLOC_045445 | ENPP7P4                       | chr3:125826844-125916384  | 0.79   | 0.19  | -2.09             | 0.00    | 0.01    |
| XLOC_043421 | SLC9C1                        | chr3:112086334-112294258  | 1.06   | 0.25  | -2.09             | 0.00    | 0.00    |
| XLOC_008681 | LOXL4                         | chr10:98134491-98268250   | 2.37   | 0.55  | -2.09             | 0.00    | 0.00    |
| XLOC_055346 | RP1-80N2.2                    | chr6:6691955-6745253      | 3.27   | 0.77  | -2.10             | 0.00    | 0.00    |
| XLOC_004139 | LINC01359                     | chr1:64972224-65002489    | 0.93   | 0.22  | -2.10             | 0.00    | 0.00    |
| XLOC_045013 | CADPS                         | chr3:62398294-62875389    | 1.52   | 0.35  | -2.10             | 0.00    | 0.00    |
| XLOC_019092 | AL928654.7,<br>C14orf80,CRIP1 | chr14:105486316-105499575 | 291.24 | 67.76 | -2.10             | 0.00    | 0.00    |
| XLOC_056075 | GSTA3,<br>GSTA5               | chr6:52831654-52909717    | 7.49   | 1.74  | -2.11             | 0.00    | 0.00    |
| XLOC_051626 | FAM134B                       | chr5:16448159-16629969    | 10.53  | 2.45  | -2.11             | 0.00    | 0.00    |
| XLOC_023151 | CHP2                          | chr16:23753688-23759057   | 103.25 | 23.92 | -2.11             | 0.00    | 0.00    |
| XLOC_008827 | GFRA1                         | chr10:116056924-116273998 | 7.96   | 1.84  | -2.11             | 0.00    | 0.00    |
| XLOC_060506 | PLXNA4                        | chr7:132123283-132648688  | 2.82   | 0.65  | -2.11             | 0.00    | 0.00    |
| XLOC_056603 | METTL24                       | chr6:110180140-110358474  | 0.85   | 0.20  | -2.11             | 0.00    | 0.00    |
| XLOC_018703 | NRXN3                         | chr14:78170372-79868290   | 1.09   | 0.25  | -2.11             | 0.00    | 0.00    |
| XLOC_035769 | OSR1                          | chr2:19351484-19364109    | 4.32   | 1.00  | -2.11             | 0.00    | 0.00    |
| XLOC_023099 | ACSM3                         | chr16:20610242-20925006   | 4.19   | 0.97  | -2.11             | 0.00    | 0.00    |
| XLOC_036009 | SLC8A1                        | chr2:39786452-40611053    | 17.05  | 3.94  | -2.11             | 0.00    | 0.00    |
| XLOC_046174 | -                             | chr3:189415689-189903858  | 1.88   | 0.43  | -2.11             | 0.00    | 0.00    |
| XLOC_009409 | BDNF-AS                       | chr11:27506837-27877648   | 2.31   | 0.53  | -2.12             | 0.00    | 0.00    |
| XLOC_029960 | PALM                          | chr19:708938-748332       | 11.44  | 2.63  | -2.12             | 0.00    | 0.00    |
| XLOC_054768 | FABP7                         | chr6:122778494-122784074  | 37.94  | 8.70  | -2.12             | 0.00    | 0.00    |
| XLOC_050904 | CTC-321K16.4                  | chr5:135634962-135828910  | 1.61   | 0.37  | -2.13             | 0.00    | 0.00    |
| XLOC_051107 | ADRB2                         | chr5:148451031-149063163  | 5.97   | 1.36  | -2.13             | 0.00    | 0.00    |
| XLOC_024149 | HS3ST6                        | chr16:1901752-1918440     | 77.88  | 17.71 | -2.14             | 0.00    | 0.00    |
| XLOC_049113 | NDNF                          | chr4:121030692-121080476  | 1.43   | 0.32  | -2.14             | 0.00    | 0.00    |
| XLOC_031160 | ZNF528-AS1                    | chr19:52369843-52418709   | 1.23   | 0.28  | -2.14             | 0.00    | 0.00    |
| XLOC_064234 | RP11-24B13.2                  | chr9:41889198-42129510    | 0.90   | 0.20  | -2.14             | 0.00    | 0.00    |
| XLOC_045033 | MAGI1-AS1                     | chr3:65353016-66038834    | 1.25   | 0.28  | -2.14             | 0.00    | 0.01    |
| XLOC_068731 | RAI2                          | chrX:17800042-17861337    | 2.99   | 0.68  | -2.14             | 0.00    | 0.00    |
| XLOC_060550 | ATP6V0A4,<br>SVOPL            | chr7:138593969-138981318  | 2.71   | 0.62  | -2.14             | 0.00    | 0.00    |
| XLOC_061143 | PEBP4                         | chr8:22678706-23083619    | 1.24   | 0.28  | -2.14             | 0.00    | 0.00    |
| XLOC_012835 | RP11-113C12.4                 | chr12:8254526-8396803     | 0.74   | 0.17  | -2.14             | 0.00    | 0.00    |
| XLOC_053582 | ID4                           | chr6:19534535-19847453    | 124.74 | 28.16 | -2.15             | 0.00    | 0.00    |

Circular RNAs and interior circular RNAs under psoriatic skin, X. Liu *et al.*

| gene_id     | gene                            | locus                     | NN     | PP    | log2(fold_change) | p_value | q_value |
|-------------|---------------------------------|---------------------------|--------|-------|-------------------|---------|---------|
| XLOC_019922 | PTPN21                          | chr14:88384923-88555056   | 45.03  | 10.16 | -2.15             | 0.00    | 0.00    |
| XLOC_042143 | LIF                             | chr22:30239193-30257981   | 2.60   | 0.59  | -2.15             | 0.00    | 0.00    |
| XLOC_037655 | NAB1                            | chr2:190606685-190708716  | 1.05   | 0.23  | -2.16             | 0.00    | 0.00    |
| XLOC_065598 | CCL27,<br>RP11-195F19.5         | chr9:34638132-34681298    | 157.69 | 35.35 | -2.16             | 0.00    | 0.00    |
| XLOC_024760 | FRG2HP                          | chr16:35315906-35336932   | 9.90   | 2.22  | -2.16             | 0.00    | 0.00    |
| XLOC_045666 | PCOLCE2                         | chr3:142815921-142889203  | 6.70   | 1.50  | -2.16             | 0.00    | 0.00    |
| XLOC_037841 | ACADL                           | chr2:210171517-210230383  | 2.04   | 0.45  | -2.17             | 0.00    | 0.00    |
| XLOC_069340 | NAP1L3                          | chrX:93670929-93673568    | 1.15   | 0.25  | -2.17             | 0.00    | 0.00    |
| XLOC_024900 | CES1                            | chr16:55802846-55833337   | 7.44   | 1.65  | -2.17             | 0.00    | 0.00    |
| XLOC_029968 | CFD                             | chr19:859448-863630       | 249.67 | 55.42 | -2.17             | 0.00    | 0.00    |
| XLOC_002414 | PRG4                            | chr1:186296278-186421764  | 1.45   | 0.32  | -2.17             | 0.00    | 0.00    |
| XLOC_013766 | ACSS3                           | chr12:80792519-81759553   | 2.45   | 0.54  | -2.17             | 0.00    | 0.00    |
| XLOC_046182 | -                               | chr3:190292901-190297567  | 0.82   | 0.18  | -2.18             | 0.00    | 0.00    |
| XLOC_004438 | BCAR3                           | chr1:93448066-93848939    | 9.26   | 2.03  | -2.19             | 0.00    | 0.00    |
| XLOC_044508 | TIMP4                           | chr3:12004401-12191705    | 1.11   | 0.24  | -2.19             | 0.00    | 0.00    |
| XLOC_002334 | SOAT1                           | chr1:179273165-179358680  | 16.09  | 3.51  | -2.20             | 0.00    | 0.00    |
| XLOC_046183 | CLDN1                           | chr3:190305700-190412237  | 260.82 | 56.67 | -2.20             | 0.00    | 0.00    |
| XLOC_001519 | GSTM5                           | chr1:109712254-109775428  | 2.95   | 0.64  | -2.21             | 0.00    | 0.00    |
| XLOC_062185 | PSCA                            | chr8:142641560-142682724  | 3.69   | 0.80  | -2.21             | 0.00    | 0.00    |
| XLOC_054924 | ARFGEF3                         | chr6:138161784-138344663  | 1.15   | 0.25  | -2.21             | 0.00    | 0.00    |
| XLOC_004023 | RP11-334A14.5                   | chr1:53062051-53142632    | 6.25   | 1.35  | -2.21             | 0.00    | 0.00    |
| XLOC_006906 | LINC01515                       | chr10:65570284-65820595   | 14.52  | 3.11  | -2.22             | 0.00    | 0.00    |
| XLOC_047420 | LINC01091,<br>RP11-381N20.1     | chr4:123490267-123934766  | 2.90   | 0.62  | -2.22             | 0.00    | 0.00    |
| XLOC_066091 | OMD                             | chr9:92297357-92674943    | 5.03   | 1.07  | -2.23             | 0.00    | 0.00    |
| XLOC_023543 | IRX6                            | chr16:55258674-55346844   | 4.26   | 0.91  | -2.23             | 0.00    | 0.00    |
| XLOC_015794 | TBX5                            | chr12:114353905-114412961 | 0.77   | 0.16  | -2.23             | 0.00    | 0.00    |
| XLOC_052832 | AC005618.8                      | chr5:141330570-141512981  | 0.87   | 0.19  | -2.23             | 0.00    | 0.00    |
| XLOC_002678 | RP11-372M18.2                   | chr1:209367661-209389072  | 1.47   | 0.31  | -2.23             | 0.00    | 0.00    |
| XLOC_038953 | APCDD1L-AS1                     | chr20:58515378-58619888   | 1.40   | 0.30  | -2.23             | 0.00    | 0.00    |
| XLOC_028467 | NPTX1                           | chr17:80466877-80477843   | 2.63   | 0.56  | -2.24             | 0.00    | 0.00    |
| XLOC_004453 | F3                              | chr1:94529224-94562515    | 45.86  | 9.68  | -2.24             | 0.00    | 0.00    |
| XLOC_025672 | RP11-849N15.1,<br>RP11-849N15.3 | chr17:15229776-15265707   | 1.05   | 0.22  | -2.25             | 0.00    | 0.00    |
| XLOC_046228 | -                               | chr3:194981415-194999067  | 0.93   | 0.20  | -2.25             | 0.00    | 0.00    |
| XLOC_015044 | KRT85                           | chr12:52360005-52367481   | 3.28   | 0.69  | -2.25             | 0.00    | 0.00    |
| XLOC_025563 | SLC2A4                          | chr17:7281666-7294615     | 1.08   | 0.23  | -2.26             | 0.00    | 0.00    |
| XLOC_031301 | SSC5D                           | chr19:55488403-55519117   | 5.60   | 1.17  | -2.26             | 0.00    | 0.00    |
| XLOC_002581 | PRELP                           | chr1:203475782-203491643  | 5.02   | 1.05  | -2.26             | 0.00    | 0.00    |

Circular RNAs and interior circular RNAs under psoriatic skin, X. Liu *et al.*

| gene_id     | gene                       | locus                     | NN    | PP    | log2(fold_change) | p_value | q_value |
|-------------|----------------------------|---------------------------|-------|-------|-------------------|---------|---------|
| XLOC_022373 | CYP1A1                     | chr15:74719437-74725679   | 1.55  | 0.32  | -2.26             | 0.00    | 0.00    |
| XLOC_044995 | ACOX2                      | chr3:58505135-58537360    | 3.66  | 0.76  | -2.26             | 0.00    | 0.00    |
| XLOC_044705 | ITGA9                      | chr3:37441319-37861780    | 1.39  | 0.29  | -2.27             | 0.00    | 0.00    |
| XLOC_068820 | TMEM47                     | chrX:34627063-34657288    | 4.92  | 1.02  | -2.27             | 0.00    | 0.00    |
| XLOC_032643 | ZNF415                     | chr19:53062150-53193386   | 2.11  | 0.44  | -2.27             | 0.00    | 0.00    |
| XLOC_008717 | PDZD7                      | chr10:100996598-101031157 | 1.05  | 0.22  | -2.28             | 0.00    | 0.00    |
| XLOC_020975 | AQP9                       | chr15:57953423-58570035   | 22.30 | 4.60  | -2.28             | 0.00    | 0.00    |
| XLOC_047922 | HAND2-AS1                  | chr4:173524968-173591324  | 1.20  | 0.25  | -2.28             | 0.00    | 0.00    |
| XLOC_043014 | SEMA3B                     | chr3:50267392-50277546    | 5.60  | 1.15  | -2.28             | 0.00    | 0.00    |
| XLOC_013355 | OR7E47P                    | chr12:52069245-52118207   | 0.82  | 0.17  | -2.29             | 0.00    | 0.00    |
| XLOC_042527 | CNTN4                      | chr3:2098751-3126613      | 1.38  | 0.28  | -2.29             | 0.00    | 0.00    |
| XLOC_055561 | -                          | chr6:25077351-25218560    | 0.73  | 0.15  | -2.29             | 0.00    | 0.01    |
| XLOC_059306 | SP8                        | chr7:20615206-20787054    | 6.18  | 1.26  | -2.29             | 0.00    | 0.00    |
| XLOC_041618 | PDGFB                      | chr22:39215719-39249159   | 0.76  | 0.16  | -2.29             | 0.00    | 0.00    |
| XLOC_014505 | MFAP5                      | chr12:8634366-8662888     | 23.23 | 4.75  | -2.29             | 0.00    | 0.00    |
| XLOC_028518 | NOTUM                      | chr17:81952506-81961840   | 0.93  | 0.19  | -2.29             | 0.00    | 0.00    |
| XLOC_043420 | SLC9C1                     | chr3:112086334-112294258  | 1.18  | 0.24  | -2.29             | 0.00    | 0.00    |
| XLOC_037883 | IGFBP5                     | chr2:216671971-216994079  | 80.04 | 16.25 | -2.30             | 0.00    | 0.00    |
| XLOC_010859 | PRR33                      | chr11:1852969-1917678     | 2.45  | 0.50  | -2.30             | 0.00    | 0.00    |
| XLOC_061040 | -                          | chr8:12448012-12708364    | 1.66  | 0.34  | -2.30             | 0.00    | 0.00    |
| XLOC_032570 | KLK1                       | chr19:50818906-50823787   | 12.92 | 2.61  | -2.31             | 0.00    | 0.00    |
| XLOC_065593 | CNTFR                      | chr9:34551346-34591830    | 1.55  | 0.31  | -2.31             | 0.00    | 0.00    |
| XLOC_010707 | DDX25                      | chr11:125883613-125939111 | 1.06  | 0.21  | -2.31             | 0.00    | 0.00    |
| XLOC_003226 | RP4-740C4.7                | chr1:2321173-2391732      | 1.03  | 0.21  | -2.32             | 0.00    | 0.00    |
| XLOC_045452 | KLF15                      | chr3:126301346-126357442  | 1.26  | 0.25  | -2.32             | 0.00    | 0.00    |
| XLOC_017972 | DHRS2                      | chr14:23630114-23645639   | 0.91  | 0.18  | -2.32             | 0.00    | 0.00    |
| XLOC_015032 | AC078864.1,<br>RP1-288H2.2 | chr12:52069245-52118207   | 1.34  | 0.27  | -2.33             | 0.00    | 0.00    |
| XLOC_047181 | RP11-115D19.1              | chr4:89551355-89841978    | 0.95  | 0.19  | -2.33             | 0.00    | 0.00    |
| XLOC_069495 | CHRD1                      | chrX:110671940-110796414  | 10.02 | 2.00  | -2.33             | 0.00    | 0.00    |
| XLOC_047675 | GLRB                       | chr4:157076056-157172090  | 1.09  | 0.22  | -2.33             | 0.00    | 0.00    |
| XLOC_029074 | CDH20                      | chr18:61333581-61555863   | 0.76  | 0.15  | -2.33             | 0.00    | 0.00    |
| XLOC_021273 | CRABP1                     | chr15:78339207-78348230   | 6.60  | 1.30  | -2.34             | 0.00    | 0.00    |
| XLOC_012472 | CLMP                       | chr11:123068355-123228277 | 8.55  | 1.68  | -2.35             | 0.00    | 0.00    |
| XLOC_043422 | RP11-757F18.3              | chr3:112086334-112294258  | 0.92  | 0.18  | -2.36             | 0.00    | 0.00    |
| XLOC_062182 | ADGRB1                     | chr8:142444494-142545009  | 2.68  | 0.52  | -2.36             | 0.00    | 0.00    |
| XLOC_055560 | AL590084.1                 | chr6:25077351-25218560    | 0.74  | 0.14  | -2.37             | 0.00    | 0.00    |
| XLOC_064649 | WNK2                       | chr9:93184134-93346414    | 8.33  | 1.62  | -2.37             | 0.00    | 0.00    |
| XLOC_052746 | CTC-321K16.4               | chr5:135634962-135828910  | 1.42  | 0.27  | -2.37             | 0.00    | 0.00    |

Circular RNAs and interior circular RNAs under psoriatic skin, X. Liu *et al.*

| gene_id     | gene                    | locus                    | NN    | PP    | log2(fold_change) | p_value | q_value |
|-------------|-------------------------|--------------------------|-------|-------|-------------------|---------|---------|
| XLOC_065099 | RP11-344B5.2            | chr9:129282407-129288674 | 2.95  | 0.57  | -2.37             | 0.00    | 0.00    |
| XLOC_017121 | POSTN                   | chr13:37562429-37598897  | 90.85 | 17.56 | -2.37             | 0.00    | 0.00    |
| XLOC_065680 | ANKRD18A                | chr9:38568683-38625132   | 1.71  | 0.33  | -2.39             | 0.00    | 0.00    |
| XLOC_067928 | -                       | chrX:93434920-93438590   | 0.80  | 0.15  | -2.39             | 0.00    | 0.00    |
| XLOC_053342 | FOXCUT                  | chr6:1604213-1607599     | 1.22  | 0.23  | -2.39             | 0.00    | 0.00    |
| XLOC_004977 | RP1-140J1.1             | chr1:153174517-153215617 | 2.11  | 0.40  | -2.39             | 0.00    | 0.00    |
| XLOC_008517 | LRIT2                   | chr10:84194387-84225589  | 1.41  | 0.27  | -2.39             | 0.00    | 0.00    |
| XLOC_033319 | AC007317.1              | chr2:40716945-40770668   | 3.79  | 0.72  | -2.39             | 0.00    | 0.00    |
| XLOC_027783 | KRT35                   | chr17:41399001-41481140  | 1.04  | 0.20  | -2.40             | 0.00    | 0.01    |
| XLOC_032614 | HAS1                    | chr19:51685362-51724137  | 1.32  | 0.25  | -2.40             | 0.00    | 0.00    |
| XLOC_046379 | RP11-20I20.4            | chr4:1166931-1209393     | 1.34  | 0.25  | -2.40             | 0.00    | 0.00    |
| XLOC_013063 | RP11-666F17.1           | chr12:26117866-26833260  | 1.90  | 0.36  | -2.41             | 0.00    | 0.00    |
| XLOC_007733 | -                       | chr10:3432492-3467563    | 2.16  | 0.41  | -2.41             | 0.00    | 0.00    |
| XLOC_007792 | -                       | chr10:8569756-8595407    | 1.29  | 0.24  | -2.41             | 0.00    | 0.00    |
| XLOC_043419 | SLC9C1                  | chr3:112086334-112294258 | 1.82  | 0.34  | -2.42             | 0.00    | 0.01    |
| XLOC_028322 | AC005152.3,<br>SOX9-AS1 | chr17:72021850-72237203  | 2.00  | 0.37  | -2.42             | 0.00    | 0.00    |
| XLOC_022586 | PLIN1                   | chr15:89664364-89690783  | 2.10  | 0.39  | -2.42             | 0.00    | 0.00    |
| XLOC_025388 | SLC22A31                | chr16:89195760-89201664  | 2.16  | 0.40  | -2.43             | 0.00    | 0.00    |
| XLOC_056844 | NHEG1                   | chr6:136965395-136999690 | 0.91  | 0.17  | -2.43             | 0.00    | 0.00    |
| XLOC_066676 | ABO                     | chr9:133233290-133275214 | 1.15  | 0.21  | -2.43             | 0.00    | 0.00    |
| XLOC_066090 | OGN                     | chr9:92297357-92674943   | 3.78  | 0.70  | -2.44             | 0.00    | 0.00    |
| XLOC_042463 | MLC1                    | chr22:50059209-50085902  | 1.11  | 0.20  | -2.44             | 0.00    | 0.00    |
| XLOC_045034 | MAGI1-AS1               | chr3:65353016-66038834   | 1.19  | 0.22  | -2.44             | 0.00    | 0.00    |
| XLOC_013647 | LGR5                    | chr12:71124995-71586310  | 3.35  | 0.62  | -2.44             | 0.00    | 0.00    |
| XLOC_042044 | GSTT2B                  | chr22:23957256-23984094  | 4.08  | 0.75  | -2.45             | 0.00    | 0.00    |
| XLOC_027788 | KRT19                   | chr17:41523614-41537123  | 6.66  | 1.22  | -2.45             | 0.00    | 0.00    |
| XLOC_013090 | FAR2                    | chr12:29149102-29381263  | 17.36 | 3.17  | -2.45             | 0.00    | 0.00    |
| XLOC_064424 | FAM189A2                | chr9:69324571-69393795   | 4.80  | 0.88  | -2.45             | 0.00    | 0.00    |
| XLOC_066123 | FBP1                    | chr9:94603081-94640249   | 3.47  | 0.63  | -2.46             | 0.00    | 0.00    |
| XLOC_068315 | FHL1                    | chrX:136146701-136211475 | 32.88 | 5.96  | -2.46             | 0.00    | 0.00    |
| XLOC_035245 | AC007563.5              | chr2:216671971-216994079 | 17.61 | 3.19  | -2.46             | 0.00    | 0.00    |
| XLOC_048498 | CNGA1                   | chr4:47593792-48040173   | 2.61  | 0.47  | -2.47             | 0.00    | 0.00    |
| XLOC_030553 | ZNF730                  | chr19:23075200-23148112  | 1.09  | 0.20  | -2.47             | 0.00    | 0.00    |
| XLOC_020424 | RP11-701H24.3           | chr15:24823636-25439099  | 0.80  | 0.14  | -2.49             | 0.00    | 0.00    |
| XLOC_059988 | SEMA3E                  | chr7:83362376-83649156   | 1.52  | 0.27  | -2.50             | 0.00    | 0.00    |
| XLOC_016723 | CLDN10                  | chr13:95433603-95644703  | 1.69  | 0.30  | -2.51             | 0.00    | 0.00    |
| XLOC_045449 | ALDH1L1                 | chr3:126103561-126210169 | 0.81  | 0.14  | -2.51             | 0.00    | 0.00    |
| XLOC_059995 | SEMA3D                  | chr7:84995128-85187172   | 2.86  | 0.50  | -2.51             | 0.00    | 0.00    |

| gene_id     | gene              | locus                     | NN    | PP    | log2(fold_change) | p_value | q_value |
|-------------|-------------------|---------------------------|-------|-------|-------------------|---------|---------|
| XLOC_022182 | RP11-39M21.1      | chr15:60479177-61229319   | 1.20  | 0.21  | -2.51             | 0.00    | 0.01    |
| XLOC_055546 | CMAHP             | chr6:25077351-25218560    | 17.81 | 3.10  | -2.52             | 0.00    | 0.00    |
| XLOC_048806 | SCD5              | chr4:82629538-82798982    | 7.96  | 1.38  | -2.53             | 0.00    | 0.00    |
| XLOC_015071 | KRT4              | chr12:52806548-52820393   | 0.72  | 0.13  | -2.53             | 0.00    | 0.00    |
| XLOC_032552 | MYH14             | chr19:50168089-50310545   | 1.18  | 0.20  | -2.53             | 0.00    | 0.00    |
| XLOC_006421 | OLAH              | chr10:15032226-15073853   | 0.87  | 0.15  | -2.54             | 0.00    | 0.00    |
| XLOC_065591 | ENHO              | chr9:34521039-34524241    | 1.37  | 0.23  | -2.54             | 0.00    | 0.01    |
| XLOC_030628 | RGS9BP            | chr19:32596906-32681760   | 1.51  | 0.26  | -2.54             | 0.00    | 0.00    |
| XLOC_015072 | KRT79             | chr12:52821256-52836899   | 60.61 | 10.40 | -2.54             | 0.00    | 0.00    |
| XLOC_061041 | -                 | chr8:12448012-12708364    | 1.87  | 0.32  | -2.55             | 0.00    | 0.00    |
| XLOC_014673 | -                 | chr12:24055859-24056661   | 0.94  | 0.16  | -2.56             | 0.00    | 0.00    |
| XLOC_057460 | SCIN              | chr7:12570124-12660179    | 5.22  | 0.89  | -2.56             | 0.00    | 0.00    |
| XLOC_061035 | RP11-419I17.1     | chr8:12448012-12708364    | 0.75  | 0.13  | -2.56             | 0.00    | 0.00    |
| XLOC_013360 | KRT7              | chr12:52232519-52309163   | 6.00  | 1.02  | -2.56             | 0.00    | 0.00    |
| XLOC_007149 | SNCG              | chr10:86935539-87024732   | 8.19  | 1.39  | -2.56             | 0.00    | 0.00    |
| XLOC_069169 | P2RY4             | chrX:70250925-70260217    | 1.45  | 0.25  | -2.56             | 0.00    | 0.00    |
| XLOC_065682 | -                 | chr9:39068308-39070583    | 0.79  | 0.13  | -2.57             | 0.00    | 0.00    |
| XLOC_018838 | C14orf132         | chr14:96039303-96098023   | 17.21 | 2.90  | -2.57             | 0.00    | 0.00    |
| XLOC_061865 | KB-1107E3.1       | chr8:101686542-102124907  | 1.20  | 0.20  | -2.58             | 0.00    | 0.00    |
| XLOC_067232 | CNKSR2            | chrX:21374192-21658330    | 0.92  | 0.15  | -2.58             | 0.00    | 0.00    |
| XLOC_051267 | GABRP             | chr5:170747046-170814047  | 1.82  | 0.30  | -2.58             | 0.00    | 0.00    |
| XLOC_010775 | NTM               | chr11:131370477-132336978 | 4.62  | 0.77  | -2.58             | 0.00    | 0.00    |
| XLOC_020425 | PWAR6             | chr15:24823636-25439099   | 0.78  | 0.13  | -2.61             | 0.00    | 0.00    |
| XLOC_043738 | CLSTN2            | chr3:139935184-140577731  | 1.55  | 0.25  | -2.61             | 0.00    | 0.00    |
| XLOC_046184 | CLDN16            | chr3:190305700-190412237  | 2.24  | 0.37  | -2.62             | 0.00    | 0.00    |
| XLOC_014681 | -                 | chr12:24191516-24562741   | 1.47  | 0.24  | -2.62             | 0.00    | 0.00    |
| XLOC_011275 | SLC1A2            | chr11:35251205-35421002   | 1.09  | 0.18  | -2.62             | 0.00    | 0.00    |
| XLOC_033633 | ATP6V1B1,<br>VAX2 | chr2:70900589-71083371    | 2.93  | 0.48  | -2.63             | 0.00    | 0.00    |
| XLOC_048112 | RP11-1263C18.1    | chr4:572425-576119        | 4.20  | 0.68  | -2.63             | 0.00    | 0.00    |
| XLOC_048948 | ADH6              | chr4:99088856-99321571    | 1.46  | 0.23  | -2.63             | 0.00    | 0.00    |
| XLOC_014674 | -                 | chr12:24057011-24057985   | 1.01  | 0.16  | -2.63             | 0.00    | 0.00    |
| XLOC_014676 | -                 | chr12:24072750-24086530   | 1.05  | 0.17  | -2.64             | 0.00    | 0.00    |
| XLOC_014672 | -                 | chr12:24007792-24055495   | 0.96  | 0.15  | -2.65             | 0.00    | 0.00    |
| XLOC_033227 | FAM179A           | chr2:28956610-29074261    | 1.09  | 0.17  | -2.65             | 0.00    | 0.00    |
| XLOC_052277 | EDIL3             | chr5:83940386-84490765    | 10.99 | 1.74  | -2.66             | 0.00    | 0.00    |
| XLOC_046594 | C1QTNF7           | chr4:15002443-15446166    | 3.50  | 0.55  | -2.66             | 0.00    | 0.00    |
| XLOC_051470 | ZDHHC11B          | chr5:612271-784746        | 3.60  | 0.57  | -2.66             | 0.00    | 0.00    |
| XLOC_065925 | MAMDC2-AS1        | chr9:69996082-70356817    | 1.15  | 0.18  | -2.67             | 0.00    | 0.00    |

Circular RNAs and interior circular RNAs under psoriatic skin, X. Liu *et al.*

| gene_id     | gene          | locus                     | NN     | PP    | log2(fold_change) | p_value | q_value |
|-------------|---------------|---------------------------|--------|-------|-------------------|---------|---------|
| XLOC_014675 | -             | chr12:24059440-24071649   | 1.06   | 0.17  | -2.67             | 0.00    | 0.00    |
| XLOC_063444 | SNTB1         | chr8:120380760-120813359  | 16.18  | 2.53  | -2.68             | 0.00    | 0.00    |
| XLOC_057963 | ZNF727        | chr7:64045438-64086611    | 1.25   | 0.19  | -2.69             | 0.00    | 0.00    |
| XLOC_002861 | C1orf95       | chr1:226548781-226609290  | 1.80   | 0.28  | -2.70             | 0.00    | 0.00    |
| XLOC_019283 | NOVA1         | chr14:26443048-26597981   | 1.64   | 0.25  | -2.70             | 0.00    | 0.00    |
| XLOC_058108 | RP11-731K22.1 | chr7:73916739-74000066    | 2.73   | 0.42  | -2.72             | 0.00    | 0.00    |
| XLOC_002611 | CNTN2         | chr1:205043196-205078499  | 0.78   | 0.12  | -2.72             | 0.00    | 0.00    |
| XLOC_038766 | WFDC2         | chr20:45469705-45481532   | 2.57   | 0.39  | -2.72             | 0.00    | 0.00    |
| XLOC_042253 | TMPRSS6       | chr22:37065014-37109759   | 1.61   | 0.24  | -2.72             | 0.00    | 0.00    |
| XLOC_053229 | FAM153A       | chr5:177682293-177794396  | 1.28   | 0.19  | -2.72             | 0.00    | 0.00    |
| XLOC_031327 | ZNF667-AS1    | chr19:56439138-56500666   | 5.98   | 0.90  | -2.73             | 0.00    | 0.00    |
| XLOC_055133 | FNDC1         | chr6:159165898-159272353  | 0.85   | 0.13  | -2.73             | 0.00    | 0.00    |
| XLOC_005164 | CADM3-AS1     | chr1:159164658-159207973  | 5.92   | 0.89  | -2.74             | 0.00    | 0.00    |
| XLOC_055140 | PNLDC1        | chr6:159800116-159821123  | 2.00   | 0.30  | -2.74             | 0.00    | 0.00    |
| XLOC_014088 | TBX5-AS1      | chr12:114353905-114412961 | 1.27   | 0.19  | -2.75             | 0.00    | 0.00    |
| XLOC_061707 | CA3           | chr8:85319016-85481493    | 0.99   | 0.15  | -2.75             | 0.00    | 0.00    |
| XLOC_014679 | -             | chr12:24187382-24191047   | 1.67   | 0.25  | -2.75             | 0.00    | 0.00    |
| XLOC_032762 | ZNF667        | chr19:56439138-56500666   | 1.13   | 0.17  | -2.76             | 0.00    | 0.00    |
| XLOC_026131 | PPP1R1B       | chr17:39626739-39636638   | 4.46   | 0.66  | -2.76             | 0.00    | 0.00    |
| XLOC_014677 | -             | chr12:24086914-24180291   | 1.23   | 0.18  | -2.76             | 0.00    | 0.00    |
| XLOC_023868 | LINC01229     | chr16:79645561-79827150   | 2.57   | 0.38  | -2.77             | 0.00    | 0.00    |
| XLOC_011276 | PAMR1         | chr11:35431822-35530300   | 14.85  | 2.17  | -2.78             | 0.00    | 0.00    |
| XLOC_021234 | ODF3L1        | chr15:75723600-75763321   | 1.11   | 0.16  | -2.78             | 0.00    | 0.00    |
| XLOC_012215 | ANGPTL5       | chr11:101890437-102001255 | 3.52   | 0.51  | -2.78             | 0.00    | 0.00    |
| XLOC_045676 | -             | chr3:144374342-144379684  | 3.85   | 0.56  | -2.78             | 0.00    | 0.00    |
| XLOC_043144 | ADAMTS9-AS2   | chr3:64515653-65027017    | 1.46   | 0.21  | -2.78             | 0.00    | 0.00    |
| XLOC_058359 | AC079781.7    | chr7:97852117-97972357    | 5.92   | 0.86  | -2.79             | 0.00    | 0.00    |
| XLOC_011629 | CHRM1         | chr11:62891174-62921869   | 1.95   | 0.28  | -2.79             | 0.00    | 0.00    |
| XLOC_034032 | C2orf40       | chr2:106041549-106078159  | 3.34   | 0.48  | -2.79             | 0.00    | 0.00    |
| XLOC_052906 | C5orf46       | chr5:147850533-147906556  | 254.59 | 36.70 | -2.79             | 0.00    | 0.00    |
| XLOC_064156 | FAM201A       | chr9:38568683-38625132    | 2.11   | 0.30  | -2.80             | 0.00    | 0.00    |
| XLOC_010066 | MYEOV         | chr11:69292478-69367726   | 4.14   | 0.60  | -2.80             | 0.00    | 0.00    |
| XLOC_068091 | PAK3          | chrX:110944284-111227519  | 2.09   | 0.30  | -2.80             | 0.00    | 0.00    |
| XLOC_009086 | TNNT3         | chr11:1919561-1938779     | 2.03   | 0.29  | -2.81             | 0.00    | 0.00    |
| XLOC_025188 | FA2H          | chr16:74712550-74774831   | 7.30   | 1.03  | -2.82             | 0.00    | 0.00    |
| XLOC_055792 | VWA7          | chr6:31739947-31777403    | 6.87   | 0.97  | -2.83             | 0.00    | 0.00    |
| XLOC_064567 | -             | chr9:86750997-86768101    | 4.90   | 0.69  | -2.83             | 0.00    | 0.00    |
| XLOC_031985 | ZNF208        | chr19:21932957-22010949   | 1.06   | 0.15  | -2.85             | 0.00    | 0.00    |



| gene_id     | gene                      | locus                    | NN    | PP   | log2(fold_change) | p_value | q_value |
|-------------|---------------------------|--------------------------|-------|------|-------------------|---------|---------|
| XLOC_003712 | RP1-34M23.5               | chr1:34712736-34859816   | 28.61 | 3.94 | -2.86             | 0.00    | 0.00    |
| XLOC_014678 | -                         | chr12:24181038-24186766  | 1.77  | 0.24 | -2.87             | 0.00    | 0.00    |
| XLOC_049463 | NPY1R                     | chr4:163323869-163352379 | 8.49  | 1.16 | -2.87             | 0.00    | 0.00    |
| XLOC_032114 | SCGB1B2P                  | chr19:34576725-34577729  | 4.16  | 0.57 | -2.88             | 0.00    | 0.01    |
| XLOC_032799 | ZSCAN18                   | chr19:58059238-58118427  | 17.97 | 2.41 | -2.90             | 0.00    | 0.00    |
| XLOC_052423 | SLCO4C1                   | chr5:102233985-102296549 | 0.73  | 0.10 | -2.90             | 0.00    | 0.01    |
| XLOC_042151 | SEC14L4                   | chr22:30475363-30505871  | 1.06  | 0.14 | -2.91             | 0.00    | 0.00    |
| XLOC_057316 | CYP2W1                    | chr7:978140-1138271      | 5.39  | 0.72 | -2.91             | 0.00    | 0.00    |
| XLOC_011809 | AP000439.3                | chr11:69475365-69479989  | 2.90  | 0.38 | -2.92             | 0.00    | 0.00    |
| XLOC_058524 | AC003989.4                | chr7:110662503-111562517 | 0.78  | 0.10 | -2.92             | 0.00    | 0.00    |
| XLOC_064572 | -                         | chr9:86942719-86947959   | 1.65  | 0.22 | -2.93             | 0.00    | 0.00    |
| XLOC_018633 | ACOT1                     | chr14:73478483-73558947  | 9.69  | 1.26 | -2.94             | 0.00    | 0.00    |
| XLOC_014533 | -                         | chr12:9852364-9932887    | 2.02  | 0.26 | -2.96             | 0.00    | 0.01    |
| XLOC_034000 | SLC9A2                    | chr2:102619532-102712138 | 0.99  | 0.13 | -2.97             | 0.00    | 0.00    |
| XLOC_041333 | UPB1                      | chr22:24270816-24528390  | 1.24  | 0.16 | -2.97             | 0.00    | 0.00    |
| XLOC_046069 | -                         | chr3:182371771-182412296 | 0.94  | 0.12 | -2.97             | 0.00    | 0.00    |
| XLOC_060089 | PDK4                      | chr7:95583498-95596491   | 7.31  | 0.92 | -2.98             | 0.00    | 0.00    |
| XLOC_030267 | BEST2                     | chr19:12750068-12758458  | 1.59  | 0.20 | -2.99             | 0.00    | 0.00    |
| XLOC_028092 | CHAD                      | chr17:50426157-50475211  | 2.21  | 0.28 | -2.99             | 0.00    | 0.00    |
| XLOC_004278 | -                         | chr1:81134408-81178197   | 1.79  | 0.22 | -3.00             | 0.00    | 0.00    |
| XLOC_015353 | TSPAN8                    | chr12:71124995-71586310  | 8.35  | 1.04 | -3.01             | 0.00    | 0.00    |
| XLOC_027692 | RP1-56K13.5               | chr17:39003247-39053210  | 1.10  | 0.13 | -3.04             | 0.00    | 0.00    |
| XLOC_048670 | UGT2A1,<br>UGT2A2         | chr4:69588256-69653281   | 1.69  | 0.21 | -3.04             | 0.00    | 0.00    |
| XLOC_052949 | PDE6A                     | chr5:149857938-149944845 | 0.93  | 0.11 | -3.04             | 0.00    | 0.00    |
| XLOC_049857 | ANKRD33B                  | chr5:10564098-10658001   | 9.65  | 1.16 | -3.06             | 0.00    | 0.00    |
| XLOC_031384 | ZNF135                    | chr19:58059238-58118427  | 1.75  | 0.21 | -3.06             | 0.00    | 0.00    |
| XLOC_038988 | CDH4                      | chr20:61252425-61940746  | 1.05  | 0.13 | -3.06             | 0.00    | 0.00    |
| XLOC_024761 | -                         | chr16:35315906-35336932  | 2.19  | 0.26 | -3.07             | 0.00    | 0.00    |
| XLOC_000627 | RNU11,<br>RP11-442N24_B.1 | chr1:28589322-28649253   | 19.34 | 2.26 | -3.10             | 0.00    | 0.00    |
| XLOC_066617 | CRAT                      | chr9:129092639-129149027 | 29.66 | 3.45 | -3.10             | 0.00    | 0.00    |
| XLOC_062575 | PHYHIP                    | chr8:22219581-22232341   | 20.28 | 2.35 | -3.11             | 0.00    | 0.00    |
| XLOC_062636 | SCARA5                    | chr8:27869759-27992727   | 32.28 | 3.74 | -3.11             | 0.00    | 0.00    |
| XLOC_061042 | AC068587.2                | chr8:12448012-12708364   | 4.60  | 0.53 | -3.12             | 0.00    | 0.00    |
| XLOC_049528 | HAND2                     | chr4:173524968-173591324 | 1.62  | 0.18 | -3.15             | 0.00    | 0.00    |
| XLOC_051078 | CTC-327F10.4              | chr5:147850533-147906556 | 9.27  | 1.04 | -3.15             | 0.00    | 0.00    |
| XLOC_058354 | TAC1                      | chr7:97731907-97740472   | 1.52  | 0.17 | -3.16             | 0.00    | 0.00    |
| XLOC_036915 | -                         | chr2:121118654-121133457 | 1.14  | 0.13 | -3.16             | 0.00    | 0.00    |

Circular RNAs and interior circular RNAs under psoriatic skin, X. Liu *et al.*

| gene_id     | gene                      | locus                     | NN     | PP    | log2(fold_change) | p_value | q_value |
|-------------|---------------------------|---------------------------|--------|-------|-------------------|---------|---------|
| XLOC_010075 | -                         | chr11:69639656-69640983   | 0.79   | 0.09  | -3.16             | 0.00    | 0.00    |
| XLOC_004794 | PDZK1                     | chr1:145607989-145708148  | 2.49   | 0.28  | -3.17             | 0.00    | 0.00    |
| XLOC_039699 | WFDC3                     | chr20:45747943-45811471   | 3.26   | 0.36  | -3.18             | 0.00    | 0.00    |
| XLOC_059928 | AC005077.9,<br>GTF2IP7    | chr7:76088172-76108864    | 0.95   | 0.10  | -3.19             | 0.00    | 0.00    |
| XLOC_008837 | SNRPGP6                   | chr10:116403890-116424625 | 0.88   | 0.10  | -3.20             | 0.00    | 0.00    |
| XLOC_013379 | AC107016.2                | chr12:52821256-52836899   | 116.97 | 12.57 | -3.22             | 0.00    | 0.01    |
| XLOC_051464 | TPPP                      | chr5:612271-784746        | 13.50  | 1.43  | -3.24             | 0.00    | 0.00    |
| XLOC_040702 | CLDN8                     | chr21:30214005-30216073   | 7.47   | 0.78  | -3.26             | 0.00    | 0.00    |
| XLOC_014682 | -                         | chr12:24191516-24562741   | 1.87   | 0.19  | -3.27             | 0.00    | 0.00    |
| XLOC_011341 | CHRM4                     | chr11:46380755-46391728   | 3.73   | 0.38  | -3.28             | 0.00    | 0.00    |
| XLOC_051587 | RP11-54F2.1               | chr5:10564098-10658001    | 4.78   | 0.48  | -3.30             | 0.00    | 0.00    |
| XLOC_065363 | GLDC                      | chr9:6532463-6645698      | 3.37   | 0.34  | -3.31             | 0.00    | 0.00    |
| XLOC_015119 | DCD                       | chr12:54644590-54648493   | 130.29 | 13.08 | -3.32             | 0.00    | 0.00    |
| XLOC_009850 | FADS2,<br>FEN1            | chr11:61680380-61867411   | 254.19 | 25.41 | -3.32             | 0.00    | 0.00    |
| XLOC_007262 | ACSM6                     | chr10:95194134-95231144   | 1.50   | 0.15  | -3.33             | 0.00    | 0.00    |
| XLOC_009866 | SCGB2A2                   | chr11:62270148-62273159   | 42.99  | 4.26  | -3.34             | 0.00    | 0.00    |
| XLOC_014534 | KLRF2                     | chr12:9852364-9932887     | 1.33   | 0.13  | -3.36             | 0.00    | 0.00    |
| XLOC_067741 | AWAT1                     | chrX:70234602-70240979    | 6.61   | 0.63  | -3.38             | 0.00    | 0.00    |
| XLOC_031835 | -                         | chr19:15594343-15608034   | 1.71   | 0.16  | -3.43             | 0.00    | 0.00    |
| XLOC_062401 | CTA-398F10.2              | chr8:8456908-8461382      | 3.38   | 0.31  | -3.44             | 0.00    | 0.00    |
| XLOC_060956 | CLDN23                    | chr8:8701937-8704106      | 20.04  | 1.83  | -3.45             | 0.00    | 0.00    |
| XLOC_048360 | PPARGC1A                  | chr4:23560922-23904089    | 3.04   | 0.28  | -3.45             | 0.00    | 0.00    |
| XLOC_058892 | PIP                       | chr7:143132076-143139746  | 12.63  | 1.15  | -3.46             | 0.00    | 0.00    |
| XLOC_002688 | HSD11B1                   | chr1:209661363-209806175  | 25.59  | 2.27  | -3.49             | 0.00    | 0.00    |
| XLOC_052908 | CTC-327F10.5              | chr5:147850533-147906556  | 1.53   | 0.14  | -3.50             | 0.00    | 0.00    |
| XLOC_033140 | AC011752.1,<br>AC067959.1 | chr2:21221122-22531105    | 2.60   | 0.23  | -3.50             | 0.00    | 0.00    |
| XLOC_006907 | AC022538.1                | chr10:65570284-65820595   | 0.78   | 0.07  | -3.55             | 0.00    | 0.00    |
| XLOC_045395 | HGD                       | chr3:120628172-120682788  | 1.29   | 0.11  | -3.57             | 0.00    | 0.00    |
| XLOC_006874 | RP11-252C24.3             | chr10:65110210-65145737   | 0.78   | 0.07  | -3.57             | 0.00    | 0.00    |
| XLOC_032818 | AC016629.3                | chr19:58559128-58599801   | 13.42  | 1.12  | -3.58             | 0.00    | 0.00    |
| XLOC_003331 | -                         | chr1:11304778-11307565    | 1.53   | 0.13  | -3.60             | 0.00    | 0.01    |
| XLOC_030568 | RP11-255H23.5             | chr19:23738976-23874701   | 1.70   | 0.14  | -3.61             | 0.00    | 0.00    |
| XLOC_031961 | CTD-2626G11.2             | chr19:20746859-20755250   | 0.84   | 0.07  | -3.62             | 0.00    | 0.00    |
| XLOC_010074 | -                         | chr11:69637578-69639538   | 0.95   | 0.08  | -3.63             | 0.00    | 0.00    |
| XLOC_006275 | RP11-464C19.3             | chr10:3911868-3949461     | 2.96   | 0.24  | -3.64             | 0.00    | 0.00    |
| XLOC_047811 | NPY5R                     | chr4:163323869-163352379  | 1.20   | 0.10  | -3.65             | 0.00    | 0.00    |
| XLOC_013313 | GPD1                      | chr12:50103621-50111443   | 6.53   | 0.52  | -3.65             | 0.00    | 0.00    |

| gene_id     | gene                                        | locus                     | NN     | PP   | log2(fold_change) | p_value | q_value |
|-------------|---------------------------------------------|---------------------------|--------|------|-------------------|---------|---------|
| XLOC_042395 | PNPLA5                                      | chr22:43879504-43892013   | 3.67   | 0.29 | -3.65             | 0.00    | 0.00    |
| XLOC_013387 | KRT18                                       | chr12:52897186-52952901   | 11.34  | 0.89 | -3.67             | 0.00    | 0.00    |
| XLOC_042157 | SEC14L6                                     | chr22:30522571-30546881   | 19.35  | 1.52 | -3.67             | 0.00    | 0.00    |
| XLOC_011595 | FADS1                                       | chr11:61680380-61867411   | 36.43  | 2.86 | -3.67             | 0.00    | 0.00    |
| XLOC_066391 | C9orf152                                    | chr9:110190047-110208189  | 0.73   | 0.06 | -3.68             | 0.00    | 0.00    |
| XLOC_065203 | RP11-98L5.5                                 | chr9:135613944-135622022  | 4.05   | 0.31 | -3.70             | 0.00    | 0.00    |
| XLOC_067740 | DGAT2L6                                     | chrX:70133448-70206924    | 10.74  | 0.81 | -3.73             | 0.00    | 0.00    |
| XLOC_039390 | RP5-1100I6.1                                | chr20:24085736-24148433   | 6.05   | 0.44 | -3.78             | 0.00    | 0.00    |
| XLOC_061852 | KB-1410C5.1,<br>KB-1410C5.2,<br>KB-1410C5.3 | chr8:101214128-101321611  | 4.60   | 0.33 | -3.79             | 0.00    | 0.00    |
| XLOC_054164 | RP1-27K12.4                                 | chr6:53497340-53617171    | 1.11   | 0.08 | -3.80             | 0.00    | 0.00    |
| XLOC_068352 | CDR1-AS                                     | chrX:140782404-140785393  | 19.87  | 1.42 | -3.81             | 0.00    | 0.00    |
| XLOC_020654 | RP11-1008C21.1                              | chr15:37968354-38084775   | 2.53   | 0.18 | -3.81             | 0.00    | 0.00    |
| XLOC_053125 | -                                           | chr5:169410461-169426978  | 1.49   | 0.11 | -3.82             | 0.00    | 0.00    |
| XLOC_023558 | MT4                                         | chr16:56565048-56569284   | 17.45  | 1.22 | -3.84             | 0.00    | 0.00    |
| XLOC_009865 | SCGB1D2                                     | chr11:62208667-62260549   | 19.96  | 1.38 | -3.85             | 0.00    | 0.00    |
| XLOC_047101 | OR7E94P,<br>RP11-234K19.1                   | chr4:79585149-79601820    | 1.18   | 0.08 | -3.87             | 0.00    | 0.00    |
| XLOC_062910 | -                                           | chr8:58701761-58752513    | 2.81   | 0.19 | -3.88             | 0.00    | 0.00    |
| XLOC_044935 | TNNC1                                       | chr3:52451101-52454704    | 5.11   | 0.34 | -3.89             | 0.00    | 0.00    |
| XLOC_051546 | C5orf49                                     | chr5:7830377-7906025      | 1.12   | 0.07 | -3.90             | 0.00    | 0.00    |
| XLOC_006176 | OR2T10,<br>OR2T11                           | chr1:248449167-248642818  | 1.16   | 0.08 | -3.91             | 0.00    | 0.00    |
| XLOC_007355 | ELOVL3                                      | chr10:102226327-102229589 | 33.73  | 2.14 | -3.98             | 0.00    | 0.00    |
| XLOC_001649 | HSD3B1                                      | chr1:119507143-119515054  | 4.46   | 0.28 | -3.98             | 0.00    | 0.00    |
| XLOC_004005 | RAB3B                                       | chr1:51907952-51990764    | 2.73   | 0.17 | -4.02             | 0.00    | 0.00    |
| XLOC_039678 | MATN4                                       | chr20:45293444-45317824   | 9.30   | 0.56 | -4.06             | 0.00    | 0.00    |
| XLOC_051807 | UGT3A2                                      | chr5:36025630-36071358    | 7.94   | 0.46 | -4.10             | 0.00    | 0.00    |
| XLOC_059888 | CLDN3                                       | chr7:73768996-73770270    | 1.61   | 0.09 | -4.15             | 0.00    | 0.00    |
| XLOC_010053 | GAL                                         | chr11:68683646-68691180   | 53.24  | 2.93 | -4.18             | 0.00    | 0.00    |
| XLOC_037845 | ERBB4                                       | chr2:211375637-212538841  | 1.20   | 0.07 | -4.19             | 0.00    | 0.00    |
| XLOC_061529 | TRIM55                                      | chr8:66126895-66175487    | 0.70   | 0.04 | -4.21             | 0.00    | 0.00    |
| XLOC_036835 | -                                           | chr2:112882045-112985723  | 1.27   | 0.07 | -4.22             | 0.00    | 0.00    |
| XLOC_010861 | H19,MIR675                                  | chr11:1995162-2001470     | 91.12  | 4.68 | -4.28             | 0.00    | 0.00    |
| XLOC_010190 | MOGAT2                                      | chr11:75716920-75734943   | 2.17   | 0.11 | -4.30             | 0.00    | 0.00    |
| XLOC_015064 | KRT77                                       | chr12:52689625-52703516   | 164.78 | 7.82 | -4.40             | 0.00    | 0.00    |
| XLOC_052903 | SPINK1                                      | chr5:147824567-147831786  | 2.12   | 0.10 | -4.42             | 0.00    | 0.01    |
| XLOC_017013 | GPR12                                       | chr13:26755001-26760816   | 1.26   | 0.06 | -4.43             | 0.00    | 0.00    |
| XLOC_069154 | AWAT2                                       | chrX:70040536-70050065    | 16.23  | 0.68 | -4.57             | 0.00    | 0.00    |
| XLOC_048705 | BTC                                         | chr4:74738626-74795004    | 33.74  | 1.42 | -4.58             | 0.00    | 0.00    |

Circular RNAs and interior circular RNAs under psoriatic skin, X. Liu *et al.*

| gene_id     | gene                                            | locus                    | NN    | PP   | log2(fold_change) | p_value | q_value |
|-------------|-------------------------------------------------|--------------------------|-------|------|-------------------|---------|---------|
| XLOC_051672 | CDH12                                           | chr5:21616261-22853622   | 2.11  | 0.09 | -4.58             | 0.00    | 0.00    |
| XLOC_001643 | HAO2                                            | chr1:119368778-119394251 | 3.73  | 0.15 | -4.59             | 0.00    | 0.00    |
| XLOC_050778 | RP11-257I8.2,<br>RP11-395P13.7,<br>RP11-508M8.1 | chr5:125036680-125416647 | 1.24  | 0.05 | -4.59             | 0.00    | 0.00    |
| XLOC_003874 | CFAP57                                          | chr1:43164174-43274002   | 0.73  | 0.03 | -4.60             | 0.00    | 0.00    |
| XLOC_010221 | THRSP                                           | chr11:78015714-78080219  | 42.51 | 1.69 | -4.65             | 0.00    | 0.00    |
| XLOC_015283 | WIF1                                            | chr12:65017467-65121566  | 11.56 | 0.44 | -4.72             | 0.00    | 0.00    |
| XLOC_024895 | RP11-26L20.3                                    | chr16:55258674-55346844  | 0.79  | 0.03 | -4.72             | 0.00    | 0.00    |
| XLOC_022796 | CACNA1H                                         | chr16:1153240-1225257    | 8.90  | 0.33 | -4.74             | 0.00    | 0.00    |
| XLOC_035356 | MOGAT1                                          | chr2:222671676-222718719 | 1.07  | 0.04 | -4.80             | 0.00    | 0.00    |
| XLOC_033544 | -                                               | chr2:64486258-64595483   | 0.77  | 0.03 | -4.80             | 0.00    | 0.00    |
| XLOC_061381 | RP11-350F16.1                                   | chr8:46915188-46934446   | 2.05  | 0.07 | -4.95             | 0.00    | 0.00    |
| XLOC_028701 | LINC01254                                       | chr18:10405132-10425411  | 2.98  | 0.09 | -5.02             | 0.00    | 0.00    |
| XLOC_047873 | LINC01612                                       | chr4:170226604-170310849 | 1.28  | 0.04 | -5.05             | 0.00    | 0.00    |
| XLOC_000213 | AADACL3                                         | chr1:12716003-12741606   | 23.51 | 0.70 | -5.07             | 0.00    | 0.00    |
| XLOC_005836 | -                                               | chr1:221488748-221504463 | 1.12  | 0.03 | -5.10             | 0.00    | 0.01    |
| XLOC_040915 | SLC37A1                                         | chr21:42472485-42581440  | 0.76  | 0.02 | -5.12             | 0.00    | 0.00    |
| XLOC_065396 | LINC00583,<br>PES1P2                            | chr9:13881866-14021613   | 0.80  | 0.02 | -5.15             | 0.00    | 0.00    |
| XLOC_070008 | ZNF736P6Y                                       | chrY:8299691-8352143     | 3.13  | 0.08 | -5.28             | 0.00    | 0.00    |
| XLOC_015076 | KRT8                                            | chr12:52897186-52952901  | 30.77 | 0.74 | -5.37             | 0.00    | 0.00    |
| XLOC_060356 | WNT2                                            | chr7:117275387-117324884 | 1.28  | 0.02 | -5.80             | 0.00    | 0.00    |
| XLOC_059277 | AGR3                                            | chr7:16846712-16881990   | 4.52  | 0.07 | -5.93             | 0.00    | 0.00    |
| XLOC_001965 | AC234582.1                                      | chr1:155169407-155192916 | 2.40  | 0.03 | -6.36             | 0.00    | 0.00    |
| XLOC_069153 | EDA                                             | chrX:69616066-70039743   | 1.55  | 0.02 | -6.41             | 0.00    | 0.00    |
| XLOC_014963 | RND1                                            | chr12:48857144-48865898  | 0.14  | 4.83 | 5.07              | 0.00    | 0.00    |
| XLOC_001402 | -                                               | chr1:95092489-95096479   | 2.04  | 0.02 | -6.61             | 0.00    | 0.00    |
| XLOC_030566 | RP11-255H23.2                                   | chr19:23738976-23874701  | 17.78 | 5.79 | -1.62             | 0.00    | 0.00    |

**Table S4. Divergent and convergent primers for the validation experiments**

|                                                       | <b>DIVERGENT Primers (5' – 3')</b>  |                         |
|-------------------------------------------------------|-------------------------------------|-------------------------|
| <b>circRNA name<br/>(circBase ID)</b>                 | <b>Forward</b>                      | <b>Reverse</b>          |
| <i>CDR1as</i><br>( <i>hsa_circ_0001946</i> )          | CATGTCTTCCAACGTCTCCA                | CTGGAAGACCCGGAGTTGT     |
| <i>hsa_skin_088763</i><br>( <i>hsa_circ_0109237</i> ) | AAATCATGCTGCTGAGAATCC               | AATCTTCCATGCCCTGCTCT    |
| <i>hsa_skin_052271</i>                                | CACCAGACATGCCCACTCT                 | TCCTGAGTACCCTTCACTGTCA  |
|                                                       | <b>CONVERGENT Primers (5' – 3')</b> |                         |
| <b>circRNA name<br/>(circBase ID)</b>                 | <b>Forward</b>                      | <b>Reverse</b>          |
| <i>CDR1as</i><br>( <i>hsa_circ_0001946</i> )          | CCTGGAGGCCATTGGAAGAT                | TCCAGTAACCTCCCAGTCTT    |
| <i>hsa_skin_088763</i><br>( <i>hsa_circ_0109237</i> ) | AAAGCATTTTGCCAGCCCTC                | TGCCACATGAGATTTGTTGGGTT |
| <i>hsa_skin_052271</i>                                | ACTGGAAGAAGGGGATCTGG                | GTGGGCATGTCTGGTGGTAT    |
| <i>GAPDH</i>                                          | GAGTCCACTGGCGTCTTCA                 | GGGGTGCTAAGCAGTTGTT     |

**Table S5. Associated genes of three validated circRNAs, *CDR1as*, *hsa\_skin\_088763* and *hsa\_skin\_052271***

r: Spearman correlation coefficient

p: p value

| Associated genes of CDR1as via hsa-miR-7-5p |       |       |          |       |       |        |       |       |         |       |       |
|---------------------------------------------|-------|-------|----------|-------|-------|--------|-------|-------|---------|-------|-------|
| gene                                        | r     | p     | gene     | r     | p     | gene   | r     | p     | gene    | r     | p     |
| HIP1                                        | 0.741 | 0.000 | SRGAP2   | 0.616 | 0.000 | IRS1   | 0.548 | 0.000 | KLHL28  | 0.455 | 0.000 |
| NFATC2                                      | 0.734 | 0.000 | IRS2     | 0.616 | 0.000 | GGT7   | 0.547 | 0.000 | SNCA    | 0.455 | 0.000 |
| NFIB                                        | 0.732 | 0.000 | RYBP     | 0.612 | 0.000 | PCGF5  | 0.546 | 0.000 | RSBN1L  | 0.453 | 0.000 |
| ERBB4                                       | 0.731 | 0.000 | MAP1B    | 0.611 | 0.000 | PRR13  | 0.541 | 0.000 | WDR47   | 0.452 | 0.000 |
| KMT2A                                       | 0.714 | 0.000 | ZNF805   | 0.610 | 0.000 | RYK    | 0.539 | 0.000 | TDRP    | 0.451 | 0.000 |
| ZBTB20                                      | 0.694 | 0.000 | CDH20    | 0.609 | 0.000 | PDE4D  | 0.538 | 0.000 | FAM208A | 0.444 | 0.000 |
| GLI3                                        | 0.693 | 0.000 | NFIA     | 0.608 | 0.000 | DACH1  | 0.536 | 0.000 | SEMA6D  | 0.439 | 0.000 |
| GATAD2B                                     | 0.680 | 0.000 | ARID2    | 0.606 | 0.000 | TNRC6A | 0.534 | 0.000 | OXR1    | 0.436 | 0.000 |
| GLG1                                        | 0.678 | 0.000 | PBX3     | 0.605 | 0.000 | COL1A2 | 0.533 | 0.000 | HERPUD2 | 0.431 | 0.000 |
| LIF                                         | 0.674 | 0.000 | SOX6     | 0.603 | 0.000 | PTAR1  | 0.533 | 0.000 | TTC16   | 0.430 | 0.000 |
| IDS                                         | 0.670 | 0.000 | NOTCH3   | 0.603 | 0.000 | PLCB1  | 0.529 | 0.000 | OGT     | 0.428 | 0.000 |
| ITGA9                                       | 0.667 | 0.000 | PLEC     | 0.602 | 0.000 | GRIN2A | 0.528 | 0.000 | ZMIZ1   | 0.425 | 0.000 |
| WWP1                                        | 0.666 | 0.000 | KIAA0430 | 0.600 | 0.000 | MEGF9  | 0.527 | 0.000 | FXR1    | 0.421 | 0.000 |
| WNT2B                                       | 0.665 | 0.000 | LIMD1    | 0.596 | 0.000 | ZNF395 | 0.525 | 0.000 | KIF16B  | 0.418 | 0.000 |
| ARIH1                                       | 0.661 | 0.000 | RBMS3    | 0.594 | 0.000 | ZFAND4 | 0.521 | 0.000 | KIF13A  | 0.417 | 0.000 |
| KDM3B                                       | 0.660 | 0.000 | CCDC80   | 0.593 | 0.000 | NCOR1  | 0.520 | 0.000 | FNDC4   | 0.413 | 0.000 |
| PHF21A                                      | 0.659 | 0.000 | SLC38A4  | 0.588 | 0.000 | FAM46C | 0.517 | 0.000 | MOB1B   | 0.401 | 0.000 |
| WDTC1                                       | 0.658 | 0.000 | FLRT2    | 0.588 | 0.000 | ATXN7  | 0.516 | 0.000 | CAMK2D  | 0.398 | 0.000 |
| TCF12                                       | 0.658 | 0.000 | GSE1     | 0.584 | 0.000 | FOXN3  | 0.513 | 0.000 | TCF4    | 0.396 | 0.000 |
| EGFR                                        | 0.657 | 0.000 | TSNARE1  | 0.584 | 0.000 | EGR3   | 0.508 | 0.000 | CUL5    | 0.370 | 0.000 |
| ZNF704                                      | 0.654 | 0.000 | INSIG2   | 0.581 | 0.000 | CTDSPL | 0.508 | 0.000 | KLF4    | 0.369 | 0.000 |
| RNF24                                       | 0.649 | 0.000 | COL4A3BP | 0.580 | 0.000 | WIPF2  | 0.507 | 0.000 | TRIM33  | 0.369 | 0.000 |
| NFIC                                        | 0.646 | 0.000 | ARID4A   | 0.579 | 0.000 | PIAS1  | 0.502 | 0.000 | NDFIP2  | 0.368 | 0.000 |
| RNF150                                      | 0.645 | 0.000 | POU6F1   | 0.578 | 0.000 | PPIL6  | 0.498 | 0.000 | SLC38A2 | 0.365 | 0.000 |
| IGF1R                                       | 0.645 | 0.000 | SATB1    | 0.574 | 0.000 | ORAI1  | 0.494 | 0.000 | SLC16A7 | 0.365 | 0.000 |
| LPP                                         | 0.645 | 0.000 | ZBTB38   | 0.572 | 0.000 | OSBPL5 | 0.493 | 0.000 | GOLGB1  | 0.362 | 0.000 |
| TGFBR2                                      | 0.636 | 0.000 | ZNF652   | 0.568 | 0.000 | RSBN1  | 0.493 | 0.000 | PSEN1   | 0.355 | 0.000 |
| PRKCB                                       | 0.636 | 0.000 | MED13L   | 0.567 | 0.000 | NLGN2  | 0.490 | 0.000 | BMPR2   | 0.354 | 0.001 |
| GATA6                                       | 0.635 | 0.000 | AGO1     | 0.567 | 0.000 | POGK   | 0.489 | 0.000 | SH3GLB1 | 0.347 | 0.001 |
| AKT3                                        | 0.635 | 0.000 | PLAG1    | 0.562 | 0.000 | KLF12  | 0.489 | 0.000 | WDFY2   | 0.346 | 0.001 |
| NFAT5                                       | 0.631 | 0.000 | CRY2     | 0.556 | 0.000 | ITGB8  | 0.489 | 0.000 | ITCH    | 0.326 | 0.001 |
| TAF1                                        | 0.626 | 0.000 | EIF4EBP2 | 0.554 | 0.000 | CHAMP1 | 0.485 | 0.000 | CYTH3   | 0.318 | 0.002 |
| ABI2                                        | 0.625 | 0.000 | CDKL1    | 0.553 | 0.000 | ZNF148 | 0.481 | 0.000 | RNF141  | 0.316 | 0.002 |
| SMG1                                        | 0.619 | 0.000 | DPYSL2   | 0.552 | 0.000 | ZBTB3  | 0.479 | 0.000 | HBP1    | 0.305 | 0.003 |
| SP1                                         | 0.619 | 0.000 | PIK3CB   | 0.550 | 0.000 | NKD1   | 0.469 | 0.000 | CCNT2   | 0.293 | 0.004 |
| NECAB1                                      | 0.618 | 0.000 | CTDSP2   | 0.550 | 0.000 | TAB2   | 0.468 | 0.000 |         |       |       |
| RAB5B                                       | 0.618 | 0.000 | PARVA    | 0.549 | 0.000 | CLASP2 | 0.468 | 0.000 |         |       |       |
| FAM168A                                     | 0.617 | 0.000 | ZNF75A   | 0.549 | 0.000 | GPBP1  | 0.456 | 0.000 |         |       |       |

| Associated genes of CDR1as via hsa-miR-135b-5p |       |       |              |       |       |           |       |       |          |       |       |
|------------------------------------------------|-------|-------|--------------|-------|-------|-----------|-------|-------|----------|-------|-------|
| gene                                           | r     | p     | gene         | r     | p     | gene      | r     | p     | gene     | r     | p     |
| ERBB4                                          | 0.731 | 0.000 | AKAP2        | 0.600 | 0.000 | ZNF292    | 0.534 | 0.000 | RSBN1L   | 0.453 | 0.000 |
| LMX1B                                          | 0.719 | 0.000 | PALM2-AKAP2  | 0.600 | 0.000 | DIAPH2    | 0.533 | 0.000 | SNRK     | 0.450 | 0.000 |
| NAALADL2                                       | 0.710 | 0.000 | ADNP         | 0.600 | 0.000 | SMAD5     | 0.533 | 0.000 | SV2B     | 0.440 | 0.000 |
| DENND2A                                        | 0.708 | 0.000 | PELI2        | 0.598 | 0.000 | ELMSAN1   | 0.531 | 0.000 | SEMA6D   | 0.439 | 0.000 |
| SORL1                                          | 0.707 | 0.000 | EBF1         | 0.598 | 0.000 | SLC8A1    | 0.530 | 0.000 | LMBRD2   | 0.438 | 0.000 |
| TCF7L2                                         | 0.698 | 0.000 | TXNIP        | 0.596 | 0.000 | PLCB1     | 0.529 | 0.000 | ZNF322   | 0.438 | 0.000 |
| ZNF302                                         | 0.695 | 0.000 | LIMD1        | 0.596 | 0.000 | ARHGEF6   | 0.528 | 0.000 | GAS7     | 0.437 | 0.000 |
| ZNF862                                         | 0.687 | 0.000 | DCLK1        | 0.595 | 0.000 | MEGF9     | 0.527 | 0.000 | NPTX1    | 0.436 | 0.000 |
| NR3C2                                          | 0.684 | 0.000 | KLF8         | 0.595 | 0.000 | TNPO2     | 0.527 | 0.000 | SUV420H2 | 0.435 | 0.000 |
| USP31                                          | 0.682 | 0.000 | THRA         | 0.594 | 0.000 | ATP8A1    | 0.526 | 0.000 | TLK1     | 0.434 | 0.000 |
| HMBX1                                          | 0.678 | 0.000 | MMP16        | 0.593 | 0.000 | FERMT2    | 0.525 | 0.000 | NCOA1    | 0.431 | 0.000 |
| TRPC1                                          | 0.676 | 0.000 | FBXL16       | 0.591 | 0.000 | FMN1      | 0.521 | 0.000 | HERPUD2  | 0.431 | 0.000 |
| TLN1                                           | 0.675 | 0.000 | ZNF70        | 0.590 | 0.000 | TRPC6     | 0.521 | 0.000 | ZNF304   | 0.426 | 0.000 |
| ZCCHC14                                        | 0.673 | 0.000 | PRUNE2       | 0.590 | 0.000 | LANCL1    | 0.520 | 0.000 | SNX18    | 0.421 | 0.000 |
| ZNF84                                          | 0.672 | 0.000 | GSK3B        | 0.587 | 0.000 | ARNT      | 0.518 | 0.000 | APMAP    | 0.416 | 0.000 |
| ZBTB44                                         | 0.670 | 0.000 | SMARCA2      | 0.585 | 0.000 | EFNB2     | 0.517 | 0.000 | ZNF225   | 0.414 | 0.000 |
| ARIH1                                          | 0.661 | 0.000 | HDAC4        | 0.584 | 0.000 | SNX16     | 0.516 | 0.000 | GPM6B    | 0.414 | 0.000 |
| SLC46A1                                        | 0.660 | 0.000 | DIP2C        | 0.584 | 0.000 | NCOA2     | 0.514 | 0.000 | PANK3    | 0.413 | 0.000 |
| KDM5A                                          | 0.659 | 0.000 | GSE1         | 0.584 | 0.000 | FOXN3     | 0.513 | 0.000 | SLC35A1  | 0.410 | 0.000 |
| ZNF135                                         | 0.657 | 0.000 | KAT6B        | 0.583 | 0.000 | REST      | 0.512 | 0.000 | SIRT1    | 0.407 | 0.000 |
| POU2F3                                         | 0.656 | 0.000 | BBX          | 0.582 | 0.000 | FANCF     | 0.511 | 0.000 | CCSAP    | 0.405 | 0.000 |
| TMEM136                                        | 0.656 | 0.000 | DIDO1        | 0.582 | 0.000 | RPS6KA6   | 0.511 | 0.000 | RORA     | 0.405 | 0.000 |
| DLG2                                           | 0.655 | 0.000 | RASAL2       | 0.582 | 0.000 | JDP2      | 0.511 | 0.000 | ZCCHC3   | 0.403 | 0.000 |
| ZNF704                                         | 0.654 | 0.000 | VCAN         | 0.580 | 0.000 | MDM4      | 0.510 | 0.000 | SHOC2    | 0.403 | 0.000 |
| RNF24                                          | 0.649 | 0.000 | CTC-432M15.3 | 0.579 | 0.000 | PSIP1     | 0.507 | 0.000 | MOB1B    | 0.401 | 0.000 |
| PTK2                                           | 0.646 | 0.000 | RAPGEF6      | 0.579 | 0.000 | CTTNBP2   | 0.507 | 0.000 | RAB3GAP2 | 0.398 | 0.000 |
| MSRB3                                          | 0.646 | 0.000 | NEGR1        | 0.579 | 0.000 | LONRF1    | 0.506 | 0.000 | CAMK2D   | 0.398 | 0.000 |
| MSL2                                           | 0.644 | 0.000 | UTRN         | 0.576 | 0.000 | RARA      | 0.504 | 0.000 | OTUD3    | 0.396 | 0.000 |
| IGSF10                                         | 0.642 | 0.000 | ARHGAP6      | 0.574 | 0.000 | LMLN      | 0.501 | 0.000 | ARNTL    | 0.390 | 0.000 |
| SKI                                            | 0.639 | 0.000 | TBC1D5       | 0.574 | 0.000 | CEP170    | 0.501 | 0.000 | MEF2C    | 0.385 | 0.000 |
| PTPRF                                          | 0.638 | 0.000 | ARHGEF7      | 0.572 | 0.000 | ZCCHC24   | 0.501 | 0.000 | LATS2    | 0.384 | 0.000 |
| GATA3                                          | 0.636 | 0.000 | GCNT2        | 0.571 | 0.000 | BMPR1A    | 0.498 | 0.000 | PDE8B    | 0.380 | 0.000 |
| TGFBR2                                         | 0.636 | 0.000 | RARB         | 0.570 | 0.000 | ADAMTS9   | 0.498 | 0.000 | INTS2    | 0.379 | 0.000 |
| AKT3                                           | 0.635 | 0.000 | PRLR         | 0.569 | 0.000 | ENTPD1    | 0.496 | 0.000 | MED13    | 0.379 | 0.000 |
| NF1                                            | 0.634 | 0.000 | NPAT         | 0.569 | 0.000 | BCL9L     | 0.494 | 0.000 | AHSA2    | 0.377 | 0.000 |
| PDGFA                                          | 0.631 | 0.000 | ZNF652       | 0.568 | 0.000 | PTPN3     | 0.493 | 0.000 | TMEM106B | 0.374 | 0.000 |
| NFAT5                                          | 0.631 | 0.000 | RBFOX2       | 0.567 | 0.000 | CCDC50    | 0.493 | 0.000 | ZBTB34   | 0.372 | 0.000 |
| TBC1D4                                         | 0.628 | 0.000 | AGO1         | 0.567 | 0.000 | KIAA1324L | 0.493 | 0.000 | KLF4     | 0.369 | 0.000 |
| ABAT                                           | 0.627 | 0.000 | AGO3         | 0.567 | 0.000 | CBLB      | 0.492 | 0.000 | NDFIP2   | 0.368 | 0.000 |
| ZKSCAN1                                        | 0.626 | 0.000 | FAM110B      | 0.558 | 0.000 | VAMP2     | 0.490 | 0.000 | JAK2     | 0.362 | 0.000 |
| ATP2B4                                         | 0.626 | 0.000 | PHLPP2       | 0.556 | 0.000 | POGK      | 0.489 | 0.000 | ANGPTL2  | 0.357 | 0.000 |
| SP8                                            | 0.626 | 0.000 | C16orf52     | 0.556 | 0.000 | FTO       | 0.487 | 0.000 | SDCBP    | 0.355 | 0.000 |
| ABI2                                           | 0.625 | 0.000 | LDLRAD4      | 0.555 | 0.000 | FOXK1     | 0.486 | 0.000 | BMPR2    | 0.354 | 0.001 |
| LRRN1                                          | 0.624 | 0.000 | ANK3         | 0.554 | 0.000 | SLC12A6   | 0.486 | 0.000 | CPD      | 0.351 | 0.001 |
| DTNA                                           | 0.622 | 0.000 | ACVR1B       | 0.554 | 0.000 | ASPH      | 0.485 | 0.000 | ELK4     | 0.344 | 0.001 |

| Associated genes of CDR1as via hsa-miR-135b-5p |       |       |         |       |       |         |       |       |        |       |       |
|------------------------------------------------|-------|-------|---------|-------|-------|---------|-------|-------|--------|-------|-------|
| gene                                           | r     | p     | gene    | r     | p     | gene    | r     | p     | gene   | r     | p     |
| SP1                                            | 0.619 | 0.000 | DAG1    | 0.553 | 0.000 | TMEM237 | 0.484 | 0.000 | GPR155 | 0.343 | 0.001 |
| RAB5B                                          | 0.618 | 0.000 | SLITRK6 | 0.552 | 0.000 | TFAP2A  | 0.481 | 0.000 | RASSF8 | 0.343 | 0.001 |
| CCDC171                                        | 0.616 | 0.000 | RNF217  | 0.551 | 0.000 | KLHL15  | 0.481 | 0.000 | MAN2A1 | 0.341 | 0.001 |
| IRS2                                           | 0.616 | 0.000 | APLF    | 0.550 | 0.000 | SPOCK1  | 0.481 | 0.000 | MRAS   | 0.340 | 0.001 |
| RYBP                                           | 0.612 | 0.000 | CTDSP2  | 0.550 | 0.000 | KLF13   | 0.479 | 0.000 | MID2   | 0.336 | 0.001 |
| MYO9A                                          | 0.612 | 0.000 | YBX2    | 0.549 | 0.000 | BTBD2   | 0.475 | 0.000 | ATG14  | 0.328 | 0.001 |
| USP13                                          | 0.611 | 0.000 | DCUN1D4 | 0.548 | 0.000 | FZD1    | 0.474 | 0.000 | CADM4  | 0.327 | 0.001 |
| CEP85L                                         | 0.610 | 0.000 | ALCAM   | 0.542 | 0.000 | GDPD1   | 0.469 | 0.000 | ERMP1  | 0.317 | 0.002 |
| FOXO1                                          | 0.609 | 0.000 | EVI5    | 0.542 | 0.000 | MEF2A   | 0.462 | 0.000 | SPRED1 | 0.310 | 0.002 |
| FRMD4A                                         | 0.607 | 0.000 | HIC2    | 0.539 | 0.000 | KCTD12  | 0.462 | 0.000 | ELOVL6 | 0.300 | 0.003 |
| COL5A1                                         | 0.605 | 0.000 | TET3    | 0.539 | 0.000 | DST     | 0.461 | 0.000 | PCMTD2 | 0.293 | 0.004 |
| SERTAD2                                        | 0.604 | 0.000 | CXCL12  | 0.539 | 0.000 | TMEM168 | 0.460 | 0.000 | MEGF11 | 0.289 | 0.005 |
| CLASP1                                         | 0.603 | 0.000 | C2CD2   | 0.539 | 0.000 | TET2    | 0.459 | 0.000 | GTF2A1 | 0.284 | 0.006 |
| PLAGL1                                         | 0.603 | 0.000 | TAF4    | 0.538 | 0.000 | ETV3    | 0.459 | 0.000 | CHSY1  | 0.277 | 0.007 |
| RSF1                                           | 0.601 | 0.000 | ANKRD40 | 0.538 | 0.000 | MAPKBP1 | 0.457 | 0.000 |        |       |       |
| PSD3                                           | 0.600 | 0.000 | BAG4    | 0.534 | 0.000 | KLHL28  | 0.455 | 0.000 |        |       |       |

| Associated genes of hsa_skin_088763 via hsa-miR-338-3p |       |       |           |       |       |         |       |       |         |       |       |
|--------------------------------------------------------|-------|-------|-----------|-------|-------|---------|-------|-------|---------|-------|-------|
| gene                                                   | r     | p     | gene      | r     | p     | gene    | r     | p     | gene    | r     | p     |
| SOX5                                                   | 0.602 | 0.000 | SLCO3A1   | 0.454 | 0.000 | RBMS3   | 0.389 | 0.000 | SS18L1  | 0.337 | 0.001 |
| ATXN7L3B                                               | 0.531 | 0.000 | CACNA2D1  | 0.445 | 0.000 | FBXW7   | 0.387 | 0.000 | CHL1    | 0.337 | 0.001 |
| MACROD2                                                | 0.529 | 0.000 | HELZ      | 0.445 | 0.000 | TACC1   | 0.381 | 0.000 | MAN2A1  | 0.333 | 0.001 |
| MSL2                                                   | 0.527 | 0.000 | GATS      | 0.445 | 0.000 | SOX4    | 0.379 | 0.000 | ZSCAN12 | 0.331 | 0.001 |
| WNT2B                                                  | 0.518 | 0.000 | ANAPC16   | 0.440 | 0.000 | ARMCX3  | 0.379 | 0.000 | TBC1D15 | 0.329 | 0.001 |
| SOX6                                                   | 0.515 | 0.000 | SP6       | 0.440 | 0.000 | KLHL12  | 0.378 | 0.000 | SEMA6D  | 0.324 | 0.002 |
| FOXP2                                                  | 0.510 | 0.000 | TMEM164   | 0.439 | 0.000 | LMBRD2  | 0.377 | 0.000 | FBXL3   | 0.321 | 0.002 |
| TAF1                                                   | 0.509 | 0.000 | ZNF436    | 0.438 | 0.000 | LGALS1  | 0.375 | 0.000 | ERC1    | 0.321 | 0.002 |
| NR3C2                                                  | 0.507 | 0.000 | JDP2      | 0.437 | 0.000 | ATF2    | 0.374 | 0.000 | NDFIP1  | 0.317 | 0.002 |
| BRD3                                                   | 0.506 | 0.000 | EFNA5     | 0.435 | 0.000 | SKIDA1  | 0.373 | 0.000 | FAM168A | 0.315 | 0.002 |
| ZNF607                                                 | 0.506 | 0.000 | PCDHB16   | 0.433 | 0.000 | LAMC1   | 0.372 | 0.000 | DAB2IP  | 0.314 | 0.002 |
| TMEM255A                                               | 0.505 | 0.000 | NIPAL1    | 0.430 | 0.000 | HUNK    | 0.370 | 0.000 | TSHZ2   | 0.313 | 0.002 |
| SIK2                                                   | 0.501 | 0.000 | KIAA1549L | 0.426 | 0.000 | PTN     | 0.368 | 0.000 | PLD1    | 0.310 | 0.002 |
| NHS                                                    | 0.495 | 0.000 | KIAA1429  | 0.426 | 0.000 | SEPSECS | 0.365 | 0.000 | TRIM33  | 0.307 | 0.003 |
| CDON                                                   | 0.492 | 0.000 | ZBTB10    | 0.425 | 0.000 | CRELD1  | 0.365 | 0.000 | DES     | 0.305 | 0.003 |
| ZFP36L1                                                | 0.477 | 0.000 | AKAP12    | 0.423 | 0.000 | FRMD3   | 0.362 | 0.000 | HPSE2   | 0.300 | 0.004 |
| ZNF652                                                 | 0.476 | 0.000 | NOVA1     | 0.423 | 0.000 | MAPT    | 0.362 | 0.000 | HSPA12A | 0.299 | 0.004 |
| FBXO32                                                 | 0.476 | 0.000 | WNK1      | 0.419 | 0.000 | NFIA    | 0.362 | 0.000 | FGFR2   | 0.298 | 0.004 |
| BBX                                                    | 0.473 | 0.000 | RNF150    | 0.415 | 0.000 | VAV3    | 0.361 | 0.000 | ESR2    | 0.293 | 0.004 |
| ZBTB20                                                 | 0.471 | 0.000 | ABI2      | 0.413 | 0.000 | SON     | 0.361 | 0.000 | TANC1   | 0.290 | 0.005 |
| DLG2                                                   | 0.468 | 0.000 | GATA6     | 0.411 | 0.000 | AKT3    | 0.361 | 0.000 | TBL1XR1 | 0.285 | 0.006 |
| DMTN                                                   | 0.462 | 0.000 | TGOLN2    | 0.405 | 0.000 | ZBTB18  | 0.354 | 0.001 | GNG12   | 0.282 | 0.006 |
| EIF4E3                                                 | 0.462 | 0.000 | JMJD1C    | 0.402 | 0.000 | TIMP4   | 0.351 | 0.001 | MAF     | 0.280 | 0.006 |
| RAB30                                                  | 0.460 | 0.000 | ESYT2     | 0.395 | 0.000 | SNX18   | 0.348 | 0.001 | SEPT4   | 0.273 | 0.008 |
| SLC35F5                                                | 0.459 | 0.000 | TSPYL4    | 0.393 | 0.000 | RNF141  | 0.346 | 0.001 | TCF4    | 0.268 | 0.009 |
| RNF217                                                 | 0.456 | 0.000 | GPD2      | 0.393 | 0.000 | XRN1    | 0.343 | 0.001 |         |       |       |
| N4BP2L1                                                | 0.456 | 0.000 | ABCA9     | 0.391 | 0.000 | F10     | 0.343 | 0.001 |         |       |       |
| PEAK1                                                  | 0.455 | 0.000 | TSPYL5    | 0.390 | 0.000 | MACC1   | 0.341 | 0.001 |         |       |       |



| Associated genes of hsa_skin_088763 via hsa-miR-12a/b-3p |       |       |          |       |       |          |       |       |            |       |       |
|----------------------------------------------------------|-------|-------|----------|-------|-------|----------|-------|-------|------------|-------|-------|
| gene                                                     | r     | p     | gene     | r     | p     | gene     | r     | p     | gene       | r     | p     |
| SOX5                                                     | 0.602 | 0.000 | UBN2     | 0.459 | 0.000 | SEPT11   | 0.411 | 0.000 | TET2       | 0.360 | 0.000 |
| ERBB4                                                    | 0.597 | 0.000 | WDR31    | 0.459 | 0.000 | NDFIP2   | 0.410 | 0.000 | EGR3       | 0.356 | 0.000 |
| PTPN14                                                   | 0.583 | 0.000 | C3orf52  | 0.458 | 0.000 | LPAR1    | 0.410 | 0.000 | ZBTB18     | 0.354 | 0.001 |
| MAML2                                                    | 0.553 | 0.000 | BMPR1A   | 0.458 | 0.000 | SMAD5    | 0.409 | 0.000 | MGAT3      | 0.353 | 0.001 |
| ZC3H6                                                    | 0.545 | 0.000 | SMURF2   | 0.457 | 0.000 | CEP85L   | 0.408 | 0.000 | MACF1      | 0.353 | 0.001 |
| ZNF395                                                   | 0.544 | 0.000 | N4BP2L1  | 0.456 | 0.000 | GCNT2    | 0.408 | 0.000 | CASD1      | 0.352 | 0.001 |
| NFIB                                                     | 0.541 | 0.000 | SALL2    | 0.454 | 0.000 | DMXL1    | 0.407 | 0.000 | MEIS1      | 0.351 | 0.001 |
| ACSS3                                                    | 0.540 | 0.000 | SPRY1    | 0.453 | 0.000 | ATXN7    | 0.407 | 0.000 | MDFIC      | 0.350 | 0.001 |
| BCL2                                                     | 0.538 | 0.000 | CYBRD1   | 0.452 | 0.000 | ZCCHC2   | 0.404 | 0.000 | DTNA       | 0.350 | 0.001 |
| SATB1                                                    | 0.536 | 0.000 | TET3     | 0.450 | 0.000 | PLAG1    | 0.404 | 0.000 | CYB561D1   | 0.348 | 0.001 |
| SSBP2                                                    | 0.534 | 0.000 | MAGI1    | 0.450 | 0.000 | PARD6G   | 0.404 | 0.000 | LASP1      | 0.347 | 0.001 |
| USP31                                                    | 0.534 | 0.000 | SETD2    | 0.448 | 0.000 | NCOA2    | 0.403 | 0.000 | RNF141     | 0.346 | 0.001 |
| ATXN7L3B                                                 | 0.531 | 0.000 | TGFBR2   | 0.448 | 0.000 | NISCH    | 0.403 | 0.000 | CSGALNACT2 | 0.345 | 0.001 |
| RYBP                                                     | 0.531 | 0.000 | RNF38    | 0.446 | 0.000 | AMER1    | 0.403 | 0.000 | DIP2C      | 0.344 | 0.001 |
| MTMR10                                                   | 0.530 | 0.000 | EPC1     | 0.446 | 0.000 | NUAK1    | 0.403 | 0.000 | AUTS2      | 0.343 | 0.001 |
| MSL2                                                     | 0.527 | 0.000 | SLC2A4RG | 0.445 | 0.000 | MITF     | 0.402 | 0.000 | CRISPLD1   | 0.343 | 0.001 |
| SOX6                                                     | 0.515 | 0.000 | HE LZ    | 0.445 | 0.000 | TRIM24   | 0.402 | 0.000 | MADD       | 0.342 | 0.001 |
| MARCH6                                                   | 0.514 | 0.000 | CREBBP   | 0.443 | 0.000 | JMJD1C   | 0.402 | 0.000 | BTBD7      | 0.341 | 0.001 |
| LPP                                                      | 0.513 | 0.000 | VCPIP1   | 0.443 | 0.000 | POGZ     | 0.402 | 0.000 | ARNT       | 0.341 | 0.001 |
| JAZF1                                                    | 0.512 | 0.000 | ZNF292   | 0.441 | 0.000 | KIAA1109 | 0.400 | 0.000 | RBM12B     | 0.340 | 0.001 |
| INPP5A                                                   | 0.510 | 0.000 | MET      | 0.440 | 0.000 | IGSF10   | 0.398 | 0.000 | PBRM1      | 0.340 | 0.001 |
| FOXP2                                                    | 0.510 | 0.000 | ERBB2IP  | 0.440 | 0.000 | FNIP1    | 0.397 | 0.000 | TTLL7      | 0.340 | 0.001 |
| RAI14                                                    | 0.506 | 0.000 | GABRB3   | 0.439 | 0.000 | CHST15   | 0.397 | 0.000 | MAP1B      | 0.339 | 0.001 |
| PTK2B                                                    | 0.506 | 0.000 | ZNRF2    | 0.439 | 0.000 | FAM73A   | 0.395 | 0.000 | MPP2       | 0.339 | 0.001 |
| AFF1                                                     | 0.505 | 0.000 | ARHGEF5  | 0.439 | 0.000 | DACH1    | 0.394 | 0.000 | TMEM168    | 0.339 | 0.001 |
| TRDMT1                                                   | 0.504 | 0.000 | FGD4     | 0.437 | 0.000 | SATB2    | 0.394 | 0.000 | PRR13      | 0.338 | 0.001 |
| NRXN3                                                    | 0.504 | 0.000 | TEAD1    | 0.435 | 0.000 | NKAP     | 0.394 | 0.000 | SS18L1     | 0.337 | 0.001 |
| PDK4                                                     | 0.502 | 0.000 | EFNA5    | 0.435 | 0.000 | GPBP1    | 0.394 | 0.000 | CHL1       | 0.337 | 0.001 |
| SIK2                                                     | 0.501 | 0.000 | PCDHA1   | 0.435 | 0.000 | TSPYL4   | 0.393 | 0.000 | AFF3       | 0.336 | 0.001 |
| VKORC1L1                                                 | 0.500 | 0.000 | PCDHA10  | 0.435 | 0.000 | INTU     | 0.393 | 0.000 | FUCA1      | 0.336 | 0.001 |
| WEE1                                                     | 0.496 | 0.000 | PCDHA11  | 0.435 | 0.000 | GLCE     | 0.393 | 0.000 | DAPK1      | 0.335 | 0.001 |
| BACH2                                                    | 0.496 | 0.000 | PCDHA12  | 0.435 | 0.000 | MAML1    | 0.393 | 0.000 | ARNT2      | 0.335 | 0.001 |
| TGFBR3                                                   | 0.493 | 0.000 | PCDHA13  | 0.435 | 0.000 | EIF4EBP2 | 0.392 | 0.000 | USP24      | 0.334 | 0.001 |
| ZNF329                                                   | 0.490 | 0.000 | PCDHA2   | 0.435 | 0.000 | SLC25A36 | 0.392 | 0.000 | RSBN1L     | 0.334 | 0.001 |
| PDGFA                                                    | 0.490 | 0.000 | PCDHA3   | 0.435 | 0.000 | TRRAP    | 0.391 | 0.000 | CELF2      | 0.330 | 0.001 |
| LZTFL1                                                   | 0.490 | 0.000 | PCDHA4   | 0.435 | 0.000 | RTF1     | 0.391 | 0.000 | TBC1D15    | 0.329 | 0.001 |
| ST7L                                                     | 0.489 | 0.000 | PCDHA5   | 0.435 | 0.000 | HIC1     | 0.389 | 0.000 | NUAK2      | 0.328 | 0.001 |
| ELF2                                                     | 0.489 | 0.000 | PCDHA6   | 0.435 | 0.000 | NEGR1    | 0.389 | 0.000 | C5orf42    | 0.327 | 0.001 |
| PNMA1                                                    | 0.489 | 0.000 | PCDHA7   | 0.435 | 0.000 | CNOT2    | 0.388 | 0.000 | CBFA2T3    | 0.327 | 0.001 |
| ID4                                                      | 0.487 | 0.000 | PCDHA8   | 0.435 | 0.000 | RUNX1T1  | 0.387 | 0.000 | EBF1       | 0.326 | 0.001 |
| CCND1                                                    | 0.487 | 0.000 | PCDHA9   | 0.435 | 0.000 | PPM1K    | 0.387 | 0.000 | FOXO4      | 0.324 | 0.002 |
| PDCD4                                                    | 0.486 | 0.000 | PCDHAC1  | 0.435 | 0.000 | FO XK1   | 0.385 | 0.000 | SEMA6D     | 0.324 | 0.002 |

| Associated genes of hsa_skin_088763 via hsa-miR-12a/b-3p |       |       |          |       |       |          |       |       |          |       |       |
|----------------------------------------------------------|-------|-------|----------|-------|-------|----------|-------|-------|----------|-------|-------|
| gene                                                     | r     | p     | gene     | r     | p     | gene     | r     | p     | gene     | r     | p     |
| PNRC1                                                    | 0.485 | 0.000 | PCDHAC2  | 0.435 | 0.000 | FKBP7    | 0.385 | 0.000 | PIK3CB   | 0.324 | 0.002 |
| PPARGC1A                                                 | 0.484 | 0.000 | DCBLD2   | 0.435 | 0.000 | ZMYM2    | 0.384 | 0.000 | ELOVL3   | 0.323 | 0.002 |
| RBL2                                                     | 0.484 | 0.000 | MICU3    | 0.435 | 0.000 | CRTAP    | 0.383 | 0.000 | LRP5     | 0.323 | 0.002 |
| DNAJB4                                                   | 0.484 | 0.000 | VGLL3    | 0.433 | 0.000 | FGF14    | 0.383 | 0.000 | CTNND2   | 0.322 | 0.002 |
| SP1                                                      | 0.483 | 0.000 | ZNF280C  | 0.433 | 0.000 | TMOD2    | 0.381 | 0.000 | VCAN     | 0.320 | 0.002 |
| STXBP6                                                   | 0.482 | 0.000 | PGRMC2   | 0.433 | 0.000 | ZC3H13   | 0.381 | 0.000 | ARID3B   | 0.318 | 0.002 |
| ISM1                                                     | 0.482 | 0.000 | JAK1     | 0.433 | 0.000 | AGO3     | 0.380 | 0.000 | GXYLT1   | 0.317 | 0.002 |
| REPS2                                                    | 0.480 | 0.000 | SNX27    | 0.432 | 0.000 | C8orf58  | 0.379 | 0.000 | RXRG     | 0.317 | 0.002 |
| KPNA5                                                    | 0.480 | 0.000 | FAM46A   | 0.430 | 0.000 | CCSAP    | 0.378 | 0.000 | AZIN1    | 0.317 | 0.002 |
| ZKSCAN1                                                  | 0.479 | 0.000 | PIP4K2B  | 0.429 | 0.000 | SPIN1    | 0.378 | 0.000 | RBM27    | 0.316 | 0.002 |
| ZNF420                                                   | 0.476 | 0.000 | USP30    | 0.429 | 0.000 | SOGA3    | 0.377 | 0.000 | DAB2IP   | 0.314 | 0.002 |
| ZNF652                                                   | 0.476 | 0.000 | COL4A3BP | 0.429 | 0.000 | SPOCK1   | 0.376 | 0.000 | TPST1    | 0.314 | 0.002 |
| FBXO32                                                   | 0.476 | 0.000 | MAP3K1   | 0.428 | 0.000 | CA2      | 0.376 | 0.000 | SWT1     | 0.313 | 0.002 |
| CBFA2T2                                                  | 0.475 | 0.000 | SPRY2    | 0.428 | 0.000 | FAS      | 0.376 | 0.000 | RAB8B    | 0.311 | 0.002 |
| GREM2                                                    | 0.475 | 0.000 | TNRC6A   | 0.428 | 0.000 | NT5DC3   | 0.376 | 0.000 | SETX     | 0.311 | 0.002 |
| ANKRD50                                                  | 0.474 | 0.000 | RPRD2    | 0.428 | 0.000 | UBE2R2   | 0.376 | 0.000 | HAS2     | 0.311 | 0.002 |
| ZNF274                                                   | 0.474 | 0.000 | STAT5B   | 0.426 | 0.000 | EPS15    | 0.375 | 0.000 | CCDC82   | 0.306 | 0.003 |
| EPN2                                                     | 0.473 | 0.000 | FAM46C   | 0.426 | 0.000 | RORA     | 0.375 | 0.000 | ZBTB2    | 0.306 | 0.003 |
| BBX                                                      | 0.473 | 0.000 | VPS37D   | 0.425 | 0.000 | FAM117B  | 0.375 | 0.000 | PRKRIR   | 0.305 | 0.003 |
| PAK3                                                     | 0.472 | 0.000 | MBTD1    | 0.424 | 0.000 | LRCH1    | 0.373 | 0.000 | SERINC3  | 0.300 | 0.003 |
| ZNF667                                                   | 0.470 | 0.000 | ZBTB37   | 0.424 | 0.000 | PURA     | 0.373 | 0.000 | HSPA12A  | 0.299 | 0.004 |
| MYO9A                                                    | 0.470 | 0.000 | PLA2R1   | 0.423 | 0.000 | LSAMP    | 0.373 | 0.000 | ZBTB34   | 0.297 | 0.004 |
| CCDC171                                                  | 0.470 | 0.000 | AKAP12   | 0.423 | 0.000 | SLC39A10 | 0.373 | 0.000 | TGFB2    | 0.297 | 0.004 |
| DOCK7                                                    | 0.470 | 0.000 | ZBED3    | 0.421 | 0.000 | FTO      | 0.373 | 0.000 | SRPK2    | 0.296 | 0.004 |
| OSBPL8                                                   | 0.469 | 0.000 | GPC4     | 0.421 | 0.000 | RSBN1    | 0.371 | 0.000 | FKBP5    | 0.296 | 0.004 |
| DLG2                                                     | 0.468 | 0.000 | WNK1     | 0.419 | 0.000 | SLC7A6OS | 0.371 | 0.000 | PTGFR    | 0.295 | 0.004 |
| KLHL28                                                   | 0.468 | 0.000 | PRELID2  | 0.419 | 0.000 | CREBZF   | 0.371 | 0.000 | SETD1B   | 0.293 | 0.004 |
| FRA10AC1                                                 | 0.468 | 0.000 | KDM4A    | 0.419 | 0.000 | ZNF423   | 0.371 | 0.000 | USP46    | 0.292 | 0.004 |
| GSK3B                                                    | 0.467 | 0.000 | XYLT1    | 0.419 | 0.000 | CAMK2N1  | 0.371 | 0.000 | ZEB1     | 0.291 | 0.005 |
| PPP1R12A                                                 | 0.466 | 0.000 | MEF2A    | 0.417 | 0.000 | PSD3     | 0.371 | 0.000 | NCOA1    | 0.289 | 0.005 |
| NFIX                                                     | 0.466 | 0.000 | RAPGEF2  | 0.417 | 0.000 | TNRC6C   | 0.371 | 0.000 | ORMDL1   | 0.289 | 0.005 |
| KLHL15                                                   | 0.465 | 0.000 | ZFH3     | 0.416 | 0.000 | WASF2    | 0.370 | 0.000 | CCDC6    | 0.288 | 0.005 |
| FAM107B                                                  | 0.464 | 0.000 | EXOC8    | 0.416 | 0.000 | ZNF225   | 0.370 | 0.000 | TAX1BP1  | 0.283 | 0.006 |
| EML5                                                     | 0.463 | 0.000 | FREM1    | 0.416 | 0.000 | TMEM144  | 0.370 | 0.000 | CFL2     | 0.281 | 0.006 |
| EIF4E3                                                   | 0.462 | 0.000 | WIPF2    | 0.416 | 0.000 | FZD4     | 0.368 | 0.000 | TAB2     | 0.280 | 0.006 |
| ZNF793                                                   | 0.462 | 0.000 | SLC8A1   | 0.415 | 0.000 | SMAD3    | 0.368 | 0.000 | MAF      | 0.280 | 0.006 |
| TMEM136                                                  | 0.462 | 0.000 | ACVR2B   | 0.415 | 0.000 | CEP128   | 0.367 | 0.000 | SDCBP    | 0.277 | 0.007 |
| ZBTB44                                                   | 0.461 | 0.000 | ADNP     | 0.415 | 0.000 | LIPH     | 0.366 | 0.000 | PKDCC    | 0.274 | 0.008 |
| PRRC2B                                                   | 0.461 | 0.000 | RNF150   | 0.415 | 0.000 | SEPSECS  | 0.365 | 0.000 | ZBTB11   | 0.273 | 0.008 |
| CNOT6L                                                   | 0.460 | 0.000 | PAPOLG   | 0.415 | 0.000 | BAZ2B    | 0.365 | 0.000 | SLC25A40 | 0.270 | 0.009 |
| FNBP1L                                                   | 0.460 | 0.000 | TENM4    | 0.414 | 0.000 | NFIA     | 0.362 | 0.000 | ADAMTS5  | 0.270 | 0.009 |
| LRIG1                                                    | 0.460 | 0.000 | GPC6     | 0.414 | 0.000 | PLXNC1   | 0.361 | 0.000 | IL17RD   | 0.269 | 0.009 |
| MED13L                                                   | 0.459 | 0.000 | MRC2     | 0.414 | 0.000 | TK2      | 0.361 | 0.000 | MMGT1    | 0.266 | 0.010 |

| Associated genes of hsa_skin_052271 via hsa-miR-135b-5p |       |        |          |       |       |         |       |       |      |       |            |
|---------------------------------------------------------|-------|--------|----------|-------|-------|---------|-------|-------|------|-------|------------|
| gene                                                    | r     | p      | gene     | r     | p     | gene    | r     | p     | gene | r     | p          |
| ALCAM                                                   | 0.292 | 0.005  | NAALADL2 | 0.280 | 0.007 | SLC44A5 | 0.271 | 0.009 |      |       |            |
| Associated genes of hsa_skin_052271 via hsa-miR-205-5p  |       |        |          |       |       |         |       |       |      |       |            |
| gene                                                    | r     | p      | gene     | r     | p     | gene    | r     | p     | gene | r     | p          |
| MAGI2                                                   | 0.288 | 0.0052 | CEP128   | 0.283 | 0.01  |         |       |       |      |       |            |
| Associated genes of hsa_skin_052271 via hsa-miR-27a-3p  |       |        |          |       |       |         |       |       |      |       |            |
| gene                                                    | r     | p      | gene     | r     | p     | gene    | r     | p     | gene | r     | p          |
| GATA6                                                   | 0.294 | 0.0042 | CEP128   | 0.283 | 0.01  | FOXP2   | 0.272 | 0.01  | WNK1 | 0.269 | 0.00904118 |
| CDR2                                                    | 0.293 | 0.0044 | KIAA1147 | 0.278 | 0.01  | SLC38A4 | 0.271 | 0.01  | PAN3 | 0.266 | 0.00994808 |
| MAGI2                                                   | 0.288 | 0.0052 |          |       |       |         |       |       |      |       |            |

**Table S6. CircRNAs significantly differentially expressed between PP and NN (p-value < 0.01)**

Avg PP: average expression level in PP

Avg NN: average expression level in NN

log2(PP/NN): log2 fold change of PP vs. NN

p-value: p value

| name            | Avg PP | Avg NN | log2(PP/NN) | p-value |
|-----------------|--------|--------|-------------|---------|
| hsa_skin_176158 | 20.63  | 59.07  | -1.52       | 0.005   |
| hsa_skin_017868 | 24.75  | 84.19  | -1.77       | 0.005   |
| hsa_skin_173421 | 15.71  | 42.25  | -1.43       | 0.004   |
| hsa_skin_102568 | 1.83   | 7.55   | -2.05       | 0.005   |
| hsa_skin_137810 | 2.98   | 21.99  | -2.88       | 0.000   |
| hsa_skin_028220 | 4.05   | 23.72  | -2.55       | 0.002   |
| hsa_skin_050166 | 15.69  | 42.72  | -1.44       | 0.006   |
| hsa_skin_039030 | 13.12  | 103.15 | -2.97       | 0.000   |
| hsa_skin_032293 | 9.80   | 14.89  | -0.60       | 0.000   |
| hsa_skin_006010 | 7.48   | 30.19  | -2.01       | 0.001   |
| hsa_skin_112375 | 3.54   | 16.56  | -2.22       | 0.001   |
| hsa_skin_150608 | 3.26   | 14.96  | -2.20       | 0.000   |
| hsa_skin_189139 | 4.05   | 17.35  | -2.10       | 0.005   |
| hsa_skin_192510 | 92.49  | 275.52 | -1.57       | 0.005   |
| hsa_skin_223866 | 3.17   | 34.37  | -3.44       | 0.000   |
| hsa_skin_059513 | 4.13   | 12.13  | -1.56       | 0.003   |
| hsa_skin_013327 | 17.45  | 44.27  | -1.34       | 0.005   |
| hsa_skin_130995 | 16.07  | 54.42  | -1.76       | 0.008   |
| hsa_skin_194732 | 2.47   | 20.78  | -3.07       | 0.000   |
| hsa_skin_194345 | 23.57  | 310.97 | -3.72       | 0.000   |
| hsa_skin_052271 | 1.43   | 9.92   | -2.79       | 0.000   |
| hsa_skin_194228 | 6.83   | 26.73  | -1.97       | 0.000   |
| hsa_skin_093700 | 1.43   | 11.77  | -3.04       | 0.000   |
| hsa_skin_098241 | 15.60  | 25.64  | -0.72       | 0.000   |
| hsa_skin_017093 | 2.85   | 14.16  | -2.31       | 0.004   |
| hsa_skin_088763 | 21.83  | 129.55 | -2.57       | 0.000   |
| hsa_skin_143837 | 1.46   | 14.89  | -3.35       | 0.001   |
| hsa_skin_142248 | 100.02 | 50.76  | 0.98        | 0.000   |
| hsa_skin_169953 | 30.30  | 37.90  | -0.32       | 0.010   |
| hsa_skin_146560 | 27.17  | 12.48  | 1.12        | 0.000   |
| hsa_skin_214394 | 29.05  | 20.63  | 0.49        | 0.003   |
| hsa_skin_232176 | 36.79  | 14.87  | 1.31        | 0.000   |
| hsa_skin_026246 | 40.16  | 30.11  | 0.42        | 0.001   |
| hsa_skin_153897 | 77.69  | 33.06  | 1.23        | 0.000   |
| hsa_skin_183503 | 181.70 | 141.33 | 0.36        | 0.005   |
| hsa_skin_216799 | 37.60  | 6.77   | 2.47        | 0.000   |

| name            | Avg PP | Avg NN | log2(PP/NN) | p-value |
|-----------------|--------|--------|-------------|---------|
| hsa_skin_199788 | 53.33  | 14.32  | 1.90        | 0.000   |
| hsa_skin_213436 | 25.78  | 12.18  | 1.08        | 0.000   |
| hsa_skin_192421 | 71.48  | 28.28  | 1.34        | 0.000   |
| hsa_skin_203265 | 61.75  | 24.55  | 1.33        | 0.000   |
| hsa_skin_083378 | 27.21  | 17.12  | 0.67        | 0.000   |
| hsa_skin_050529 | 204.16 | 144.49 | 0.50        | 0.006   |
| hsa_skin_083065 | 680.04 | 415.55 | 0.71        | 0.001   |
| hsa_skin_189369 | 18.41  | 11.27  | 0.71        | 0.002   |
| hsa_skin_171562 | 37.36  | 17.79  | 1.07        | 0.000   |
| hsa_skin_156445 | 8.79   | 2.43   | 1.85        | 0.000   |
| hsa_skin_228653 | 5.71   | 1.82   | 1.65        | 0.000   |
| hsa_skin_006690 | 13.62  | 11.38  | 0.26        | 0.008   |
| hsa_skin_228518 | 10.72  | 5.15   | 1.06        | 0.002   |
| hsa_skin_060631 | 12.85  | 4.19   | 1.62        | 0.002   |
| hsa_skin_130118 | 12.98  | 9.89   | 0.39        | 0.001   |
